# Supplementary material for: Garcimultiflins A–C, unusual polycyclic polyprenylated acylphloroglucinols from the pericarps of Garcinia multiflora as interleukin-1β and pyroptosis inhibitors
Source: Royal Society of Chemistry journal article supplement (doi:10.1039/d3qo00752a), 2023-01-01
Supplement: d3qo00752a1.pdf [file d3qo00752a1.pdf]

## Supporting information

### **Garcimultiflins A–C, unusual polycyclic polyprenylated acylphloroglucinols from the pericarps of *Garcinia multiflora* as interleukin-1 $\beta$ and pyroptosis inhibitors**

Jun Cao,<sup>‡a</sup> Jiali Chen,<sup>‡a</sup> Rongrong Du,<sup>b</sup> Qingwen Zhang,<sup>a</sup> Lishe Gan<sup>c</sup>, Peicheng Zhang<sup>\*b</sup> and Ligen Lin<sup>\*a</sup>

<sup>a</sup>*State Key Laboratory of Quality Research in Chinese Medicine, Institute of Chinese Medical Sciences, University of Macau, Avenida da Universidade, Taipa, Macao 999078, China*

<sup>b</sup>*State Key Laboratory of Bioactive Substance and Function of Natural Medicines, Institute of Materia Medica, Chinese Academy of Medical Sciences and Peking Union Medical College, Beijing 100050, China*

<sup>c</sup>*School of Biotechnology and Health Sciences, Wuyi University, Jiangmen, Guangdong 529020, China*

\* Corresponding authors:

Peicheng Zhang, E-mail: pczhang@imm.ac.cn

Ligen Lin, E-mail: ligenl@um.edu.mo

## Table of Contents

|                                                                                                 |    |
|-------------------------------------------------------------------------------------------------|----|
| Table S1. Crystal data and structure refinement for garcimultiflin A.....                       | 5  |
| Fig. S1. The $^1\text{H}$ NMR spectrum of 1 (600 MHz, DMSO- $d_6$ ). .....                      | 6  |
| Fig. S2. The $^{13}\text{C}$ NMR spectrum of 1 (150 MHz, DMSO- $d_6$ ). .....                   | 6  |
| Fig. S3. The DEPT135 spectrum of 1 (600 MHz, DMSO- $d_6$ ). .....                               | 7  |
| Fig. S4. The HSQC spectrum of 1 (600 MHz, DMSO- $d_6$ ). .....                                  | 7  |
| Fig. S5. The HMBC spectrum of 1 (600 MHz, DMSO- $d_6$ ). .....                                  | 8  |
| Fig. S6. The $^1\text{H}$ - $^1\text{H}$ COSY spectrum of 1 (600 MHz, DMSO- $d_6$ ). .....      | 8  |
| Fig. S7. The ROESY spectrum of 1 (600 MHz, DMSO- $d_6$ ). .....                                 | 9  |
| Fig. S8. The HR-ESI-MS spectrum of 1. ....                                                      | 10 |
| Fig. S9. The IR spectrum of 1. ....                                                             | 11 |
| Fig. S10. The UV spectrum of 1. ....                                                            | 11 |
| Fig. S11. The experimental ECD spectrum of 1 in $\text{CH}_3\text{OH}$ . .....                  | 12 |
| Fig. S12. The $^1\text{H}$ NMR spectrum of 2 (600 MHz, $\text{CDCl}_3$ ). .....                 | 12 |
| Fig. S13. The $^{13}\text{C}$ NMR spectrum of 2 (150 MHz, $\text{CDCl}_3$ ). .....              | 13 |
| Fig. S14. The DEPT135 spectrum of 2 (600 MHz, $\text{CDCl}_3$ ). .....                          | 13 |
| Fig. S15. The HSQC spectrum of 2 (600 MHz, $\text{CDCl}_3$ ). .....                             | 14 |
| Fig. S16. The HMBC spectrum of 2 (600 MHz, $\text{CDCl}_3$ ). .....                             | 14 |
| Fig. S17. The $^1\text{H}$ - $^1\text{H}$ COSY spectrum of 2 (600 MHz, $\text{CDCl}_3$ ). ..... | 15 |
| Fig. S18. The ROESY spectrum of 2 (600 MHz, $\text{CDCl}_3$ ). .....                            | 15 |
| Fig. S19. The HR-ESI-MS spectrum of 2. ....                                                     | 16 |
| Fig. S20. The IR spectrum of 2. ....                                                            | 17 |
| Fig. S21. The UV spectrum of 2. ....                                                            | 17 |
| Fig. S22. The experimental ECD spectrum of 2 in $\text{CH}_3\text{OH}$ . .....                  | 18 |
| Fig. S23. The $^1\text{H}$ NMR spectrum of 3 (600 MHz, DMSO- $d_6$ ). .....                     | 18 |
| Fig. S24. The $^{13}\text{C}$ NMR spectrum of 3 (150 MHz, DMSO- $d_6$ ). .....                  | 19 |
| Fig. S25. The DEPT135 spectrum of 3 (600 MHz, DMSO- $d_6$ ). .....                              | 19 |
| Fig. S26. The HSQC spectrum of 3 (600 MHz, DMSO- $d_6$ ). .....                                 | 20 |

|                                                                                                                                                                                                                                                                                                                      |    |
|----------------------------------------------------------------------------------------------------------------------------------------------------------------------------------------------------------------------------------------------------------------------------------------------------------------------|----|
| Fig. S27. The HMBC spectrum of 3 (600 MHz, DMSO- <i>d</i> <sub>6</sub> ).....                                                                                                                                                                                                                                        | 20 |
| Fig. S28. The <sup>1</sup> H- <sup>1</sup> H COSY spectrum of 3 (600 MHz, DMSO- <i>d</i> <sub>6</sub> ).....                                                                                                                                                                                                         | 21 |
| Fig. S29. The ROESY spectrum of 3 (600 MHz, DMSO- <i>d</i> <sub>6</sub> ).....                                                                                                                                                                                                                                       | 21 |
| Fig. S30. The ROESY spectrum (OH-18/H <sub>2</sub> -16) of 3 (600 MHz, DMSO- <i>d</i> <sub>6</sub> ).....                                                                                                                                                                                                            | 22 |
| Fig. S31. The HR-ESI-MS spectrum of 3. ....                                                                                                                                                                                                                                                                          | 23 |
| Fig. S32. The IR spectrum of 3.....                                                                                                                                                                                                                                                                                  | 24 |
| Fig. S33. The UV spectrum of 3.....                                                                                                                                                                                                                                                                                  | 24 |
| Fig. S34. The experimental ECD spectrum of 3 in CH <sub>3</sub> OH.....                                                                                                                                                                                                                                              | 25 |
| Fig. S35. Space distance measurement in ChemBio 3D.....                                                                                                                                                                                                                                                              | 25 |
| ECD calculation method .....                                                                                                                                                                                                                                                                                         | 25 |
| Fig. S36. Simplification of calculation structures. ....                                                                                                                                                                                                                                                             | 27 |
| Fig. S37. DFT-optimized structures for low-energy conformers and Boltzmann distributions of compound (1 <i>S</i> ,2 <i>S</i> ,5 <i>S</i> ,6 <i>R</i> ,10 <i>R</i> )-1a [(1 <i>S</i> ,2 <i>S</i> ,5 <i>S</i> ,6 <i>R</i> ,10 <i>R</i> )-1a1-(1 <i>S</i> ,2 <i>S</i> ,5 <i>S</i> ,6 <i>R</i> ,10 <i>R</i> )-1a2].....  | 27 |
| Table S2. The Cartesian coordinates for the lowest-energy conformer of (1 <i>S</i> ,2 <i>S</i> ,5 <i>S</i> ,6 <i>R</i> ,10 <i>R</i> )-1a1 in the ECD calculations.....                                                                                                                                               | 27 |
| Table S3. The Cartesian coordinates for the lowest-energy conformer of (1 <i>S</i> ,2 <i>S</i> ,5 <i>S</i> ,6 <i>R</i> ,10 <i>R</i> )-1a2 in the ECD calculations.....                                                                                                                                               | 29 |
| Fig. S38. DFT-optimized structures for low-energy conformers and Boltzmann distributions of compound (1 <i>R</i> ,2 <i>S</i> ,5 <i>S</i> ,6 <i>R</i> ,10 <i>R</i> )-1a [(1 <i>R</i> ,2 <i>S</i> ,5 <i>S</i> ,6 <i>R</i> ,10 <i>R</i> )-1a1]. ....                                                                    | 30 |
| Table S4. The Cartesian coordinates for the lowest-energy conformer of (1 <i>R</i> ,2 <i>S</i> ,5 <i>S</i> ,6 <i>R</i> ,10 <i>R</i> )-1a1 in the ECD calculations. ....                                                                                                                                              | 30 |
| Conformers and energy analysis of (3 <i>S</i> , 5 <i>S</i> )-2 .....                                                                                                                                                                                                                                                 | 32 |
| Figure S39. B3LYP/6-31G(d) optimized lowest energy conformers for (3 <i>S</i> , 5 <i>S</i> )-2. ....                                                                                                                                                                                                                 | 32 |
| Table S5. Energy (298.15 K) analysis for (3 <i>S</i> , 5 <i>S</i> )-2.....                                                                                                                                                                                                                                           | 32 |
| Table S6. Calculated ECD Data for (3 <i>S</i> , 5 <i>S</i> )-2 in methanol. ....                                                                                                                                                                                                                                     | 33 |
| Fig. S40. DFT-optimized structures for low-energy conformers and Boltzmann distributions of compound (1 <i>R</i> ,3 <i>S</i> ,5 <i>R</i> ,6 <i>S</i> ,17 <i>R</i> )-3a [(1 <i>R</i> ,3 <i>S</i> ,5 <i>R</i> ,6 <i>S</i> ,17 <i>R</i> )-3a1-(1 <i>R</i> ,3 <i>S</i> ,5 <i>R</i> ,6 <i>S</i> ,17 <i>R</i> )-3a8]. .... | 40 |

|                                                                                                                                                                       |           |
|-----------------------------------------------------------------------------------------------------------------------------------------------------------------------|-----------|
| <b>Table S7. The Cartesian coordinates for the lowest-energy conformer of (1<i>R</i>,3<i>S</i>,5<i>R</i>,6<i>S</i>,17<i>R</i>)-3a1 in the ECD calculations. ....</b>  | <b>40</b> |
| <b>Table S8. The Cartesian coordinates for the lowest-energy conformer of (1<i>R</i>,3<i>S</i>,5<i>R</i>,6<i>S</i>,17<i>R</i>)-3a2 in the ECD calculations. ....</b>  | <b>41</b> |
| <b>Table S9. The Cartesian coordinates for the lowest-energy conformer of (1<i>R</i>,3<i>S</i>,5<i>R</i>,6<i>S</i>,17<i>R</i>)-3a3 in the ECD calculations. ....</b>  | <b>43</b> |
| <b>Table S10. The Cartesian coordinates for the lowest-energy conformer of (1<i>R</i>,3<i>S</i>,5<i>R</i>,6<i>S</i>,17<i>R</i>)-3a4 in the ECD calculations. ....</b> | <b>44</b> |
| <b>Table S11. The Cartesian coordinates for the lowest-energy conformer of (1<i>R</i>,3<i>S</i>,5<i>R</i>,6<i>S</i>,17<i>R</i>)-3a5 in the ECD calculations. ....</b> | <b>45</b> |
| <b>Table S12. The Cartesian coordinates for the lowest-energy conformer of (1<i>R</i>,3<i>S</i>,5<i>R</i>,6<i>S</i>,17<i>R</i>)-3a6 in the ECD calculations. ....</b> | <b>46</b> |
| <b>Table S13. The Cartesian coordinates for the lowest-energy conformer of (1<i>R</i>,3<i>S</i>,5<i>R</i>,6<i>S</i>,17<i>R</i>)-3a7 in the ECD calculations. ....</b> | <b>47</b> |
| <b>Table S14. The Cartesian coordinates for the lowest-energy conformer of (1<i>R</i>,3<i>S</i>,5<i>R</i>,6<i>S</i>,17<i>R</i>)-3a8 in the ECD calculations. ....</b> | <b>48</b> |
| <b>Table S15. The NO inhibitory effects of compounds 1–3 at the maximum safe concentrations on LPS-induced RAW264.7 macrophages. ....</b>                             | <b>49</b> |
| <b>Fig. S41. Uncropped blots. ....</b>                                                                                                                                | <b>50</b> |

**Table S1. Crystal data and structure refinement for garcimultiflin A.**

|                                             |                                                               |
|---------------------------------------------|---------------------------------------------------------------|
| Empirical formula                           | C <sub>34</sub> H <sub>48</sub> O <sub>10</sub>               |
| Formula weight                              | 616.72                                                        |
| Temperature/K                               | 150.00                                                        |
| Crystal system                              | monoclinic                                                    |
| Space group                                 | P2 <sub>1</sub>                                               |
| a/Å                                         | 8.3050(2)                                                     |
| b/Å                                         | 18.9835(5)                                                    |
| c/Å                                         | 10.5728(2)                                                    |
| $\alpha$ /°                                 | 90                                                            |
| $\beta$ /°                                  | 102.7180(10)                                                  |
| $\gamma$ /°                                 | 90                                                            |
| Volume/Å <sup>3</sup>                       | 1625.99(7)                                                    |
| Z                                           | 2                                                             |
| $\rho_{\text{calc}}$ /cm <sup>3</sup>       | 1.260                                                         |
| $\mu$ /mm <sup>-1</sup>                     | 0.754                                                         |
| F(000)                                      | 664.0                                                         |
| Crystal size/mm <sup>3</sup>                | 0.2 × 0.15 × 0.1                                              |
| Radiation                                   | CuK $\alpha$ ( $\lambda$ = 1.54178)                           |
| 2 $\theta$ range for data collection/°      | 8.574 to 149.642                                              |
| Index ranges                                | -10 ≤ h ≤ 10, -22 ≤ k ≤ 23, -13 ≤ l ≤ 11                      |
| Reflections collected                       | 15933                                                         |
| Independent reflections                     | 6226 [R <sub>int</sub> = 0.0365, R <sub>sigma</sub> = 0.0366] |
| Data/restraints/parameters                  | 6226/1/410                                                    |
| Goodness-of-fit on F <sup>2</sup>           | 1.086                                                         |
| Final R indexes [I >= 2 $\sigma$ (I)]       | R <sub>1</sub> = 0.0666, wR <sub>2</sub> = 0.1554             |
| Final R indexes [all data]                  | R <sub>1</sub> = 0.0686, wR <sub>2</sub> = 0.1582             |
| Largest diff. peak/hole / e Å <sup>-3</sup> | 0.42/-0.19                                                    |
| Flack parameter                             | 0.06(9)                                                       |

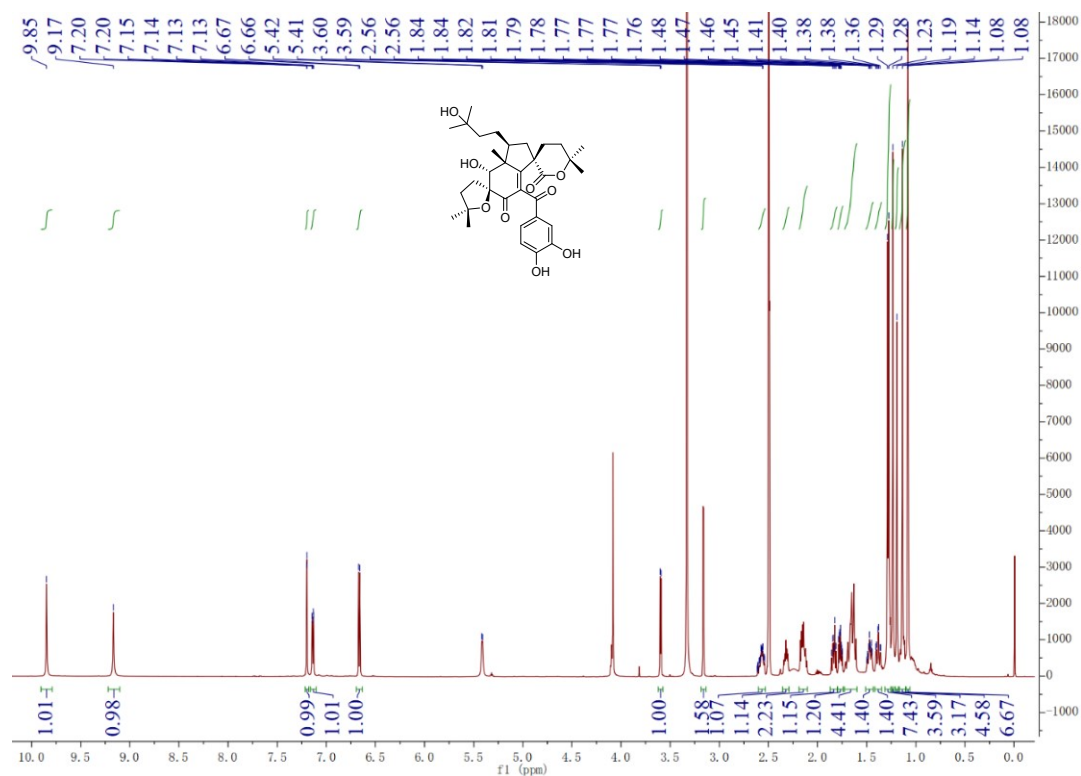

Fig. S1. The  $^1\text{H}$  NMR spectrum of 1 (600 MHz,  $\text{DMSO-}d_6$ ).

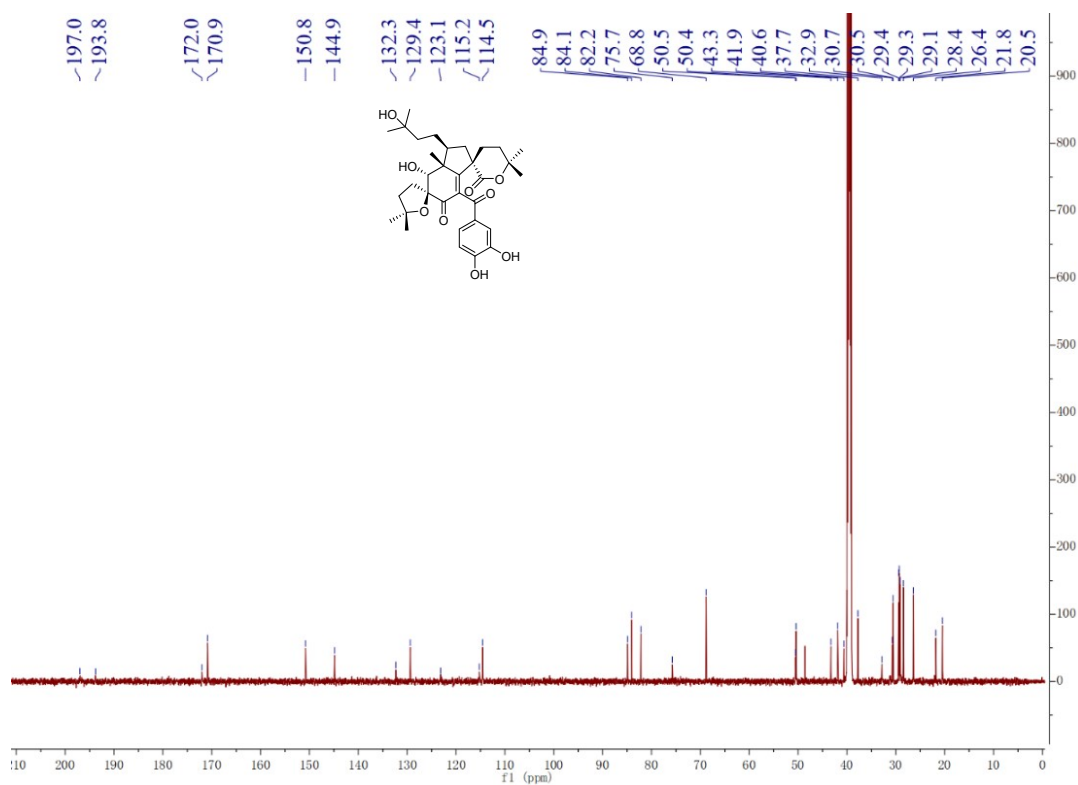

Fig. S2. The  $^{13}\text{C}$  NMR spectrum of 1 (150 MHz,  $\text{DMSO-}d_6$ ).

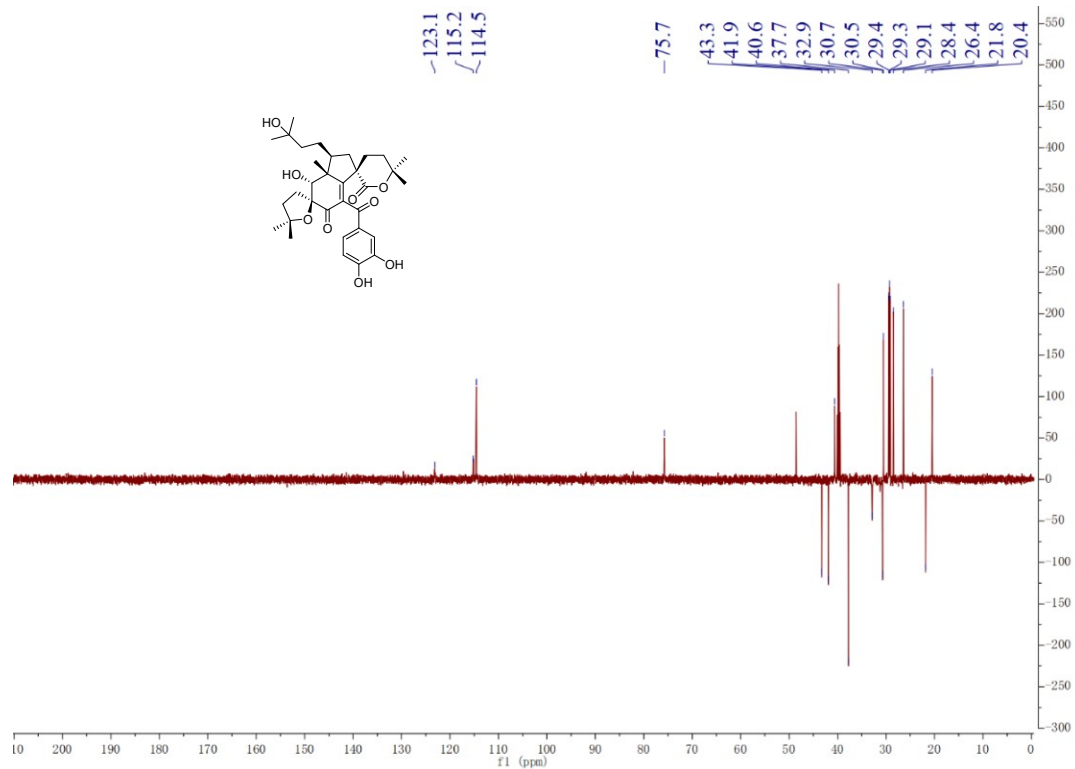

Fig. S3. The DEPT135 spectrum of 1 (600 MHz, DMSO- $d_6$ ).

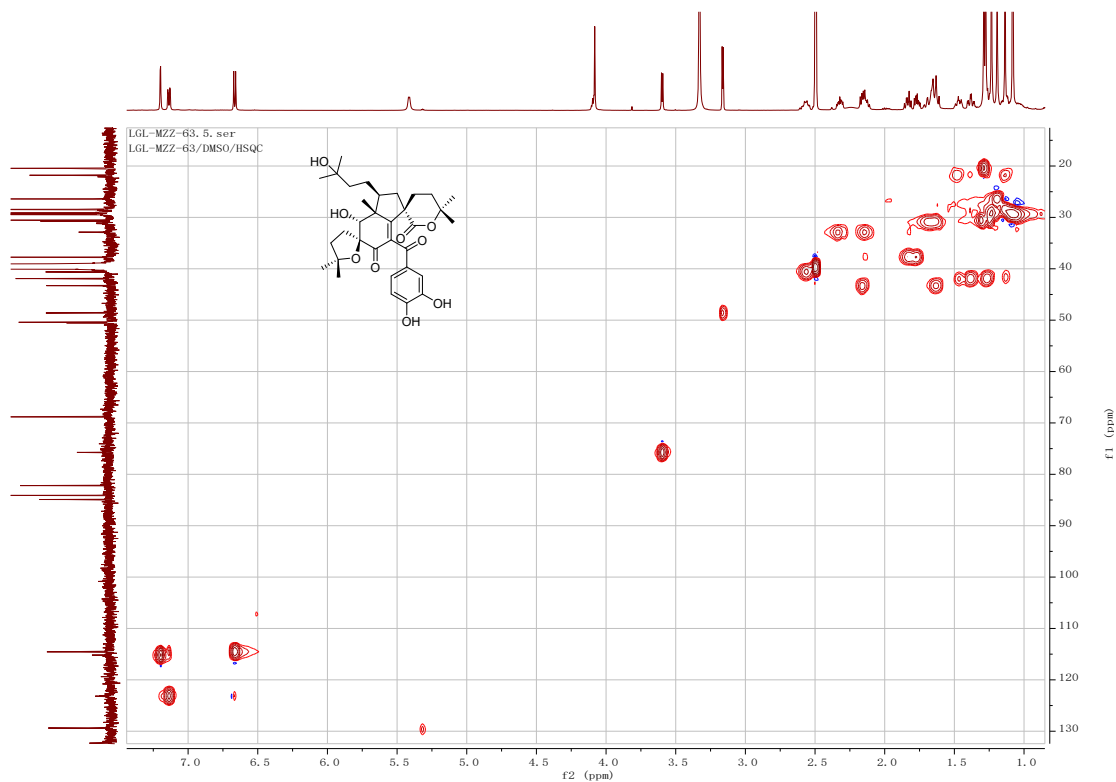

Fig. S4. The HSQC spectrum of 1 (600 MHz, DMSO- $d_6$ ).

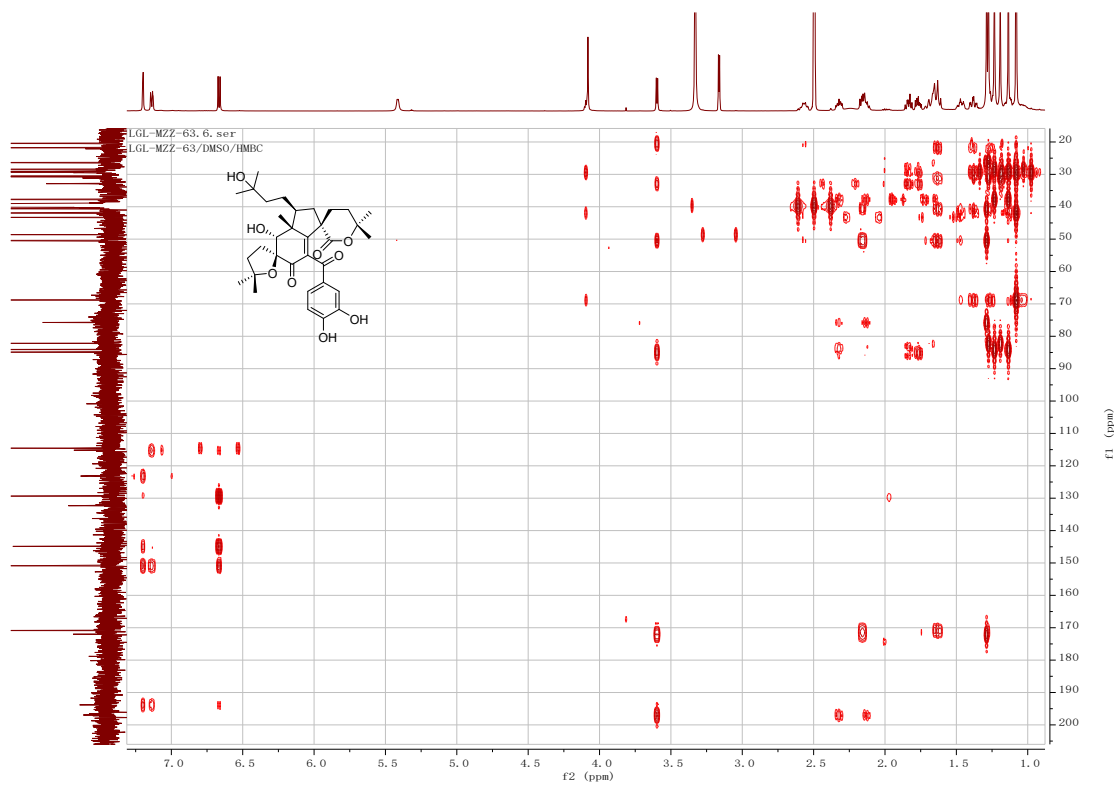

**Fig. S5. The HMBC spectrum of 1 (600 MHz, DMSO- $d_6$ ).**

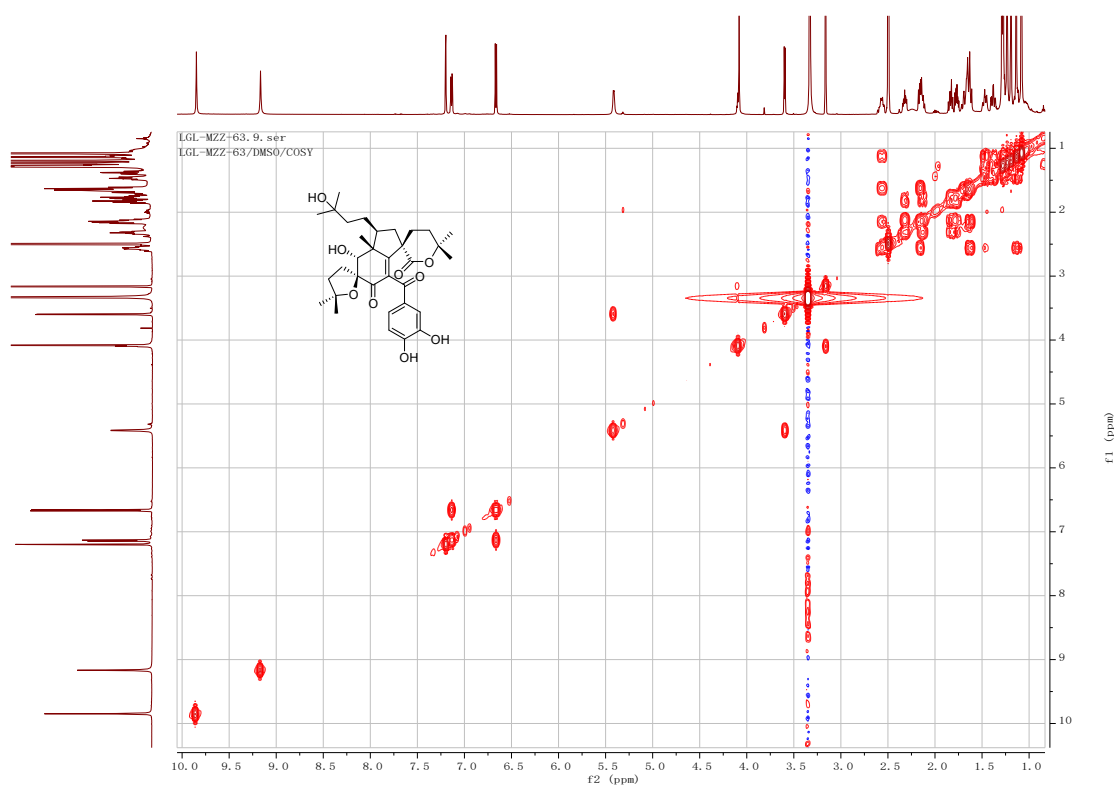

**Fig. S6. The  $^1\text{H}$ - $^1\text{H}$  COSY spectrum of 1 (600 MHz, DMSO- $d_6$ ).**



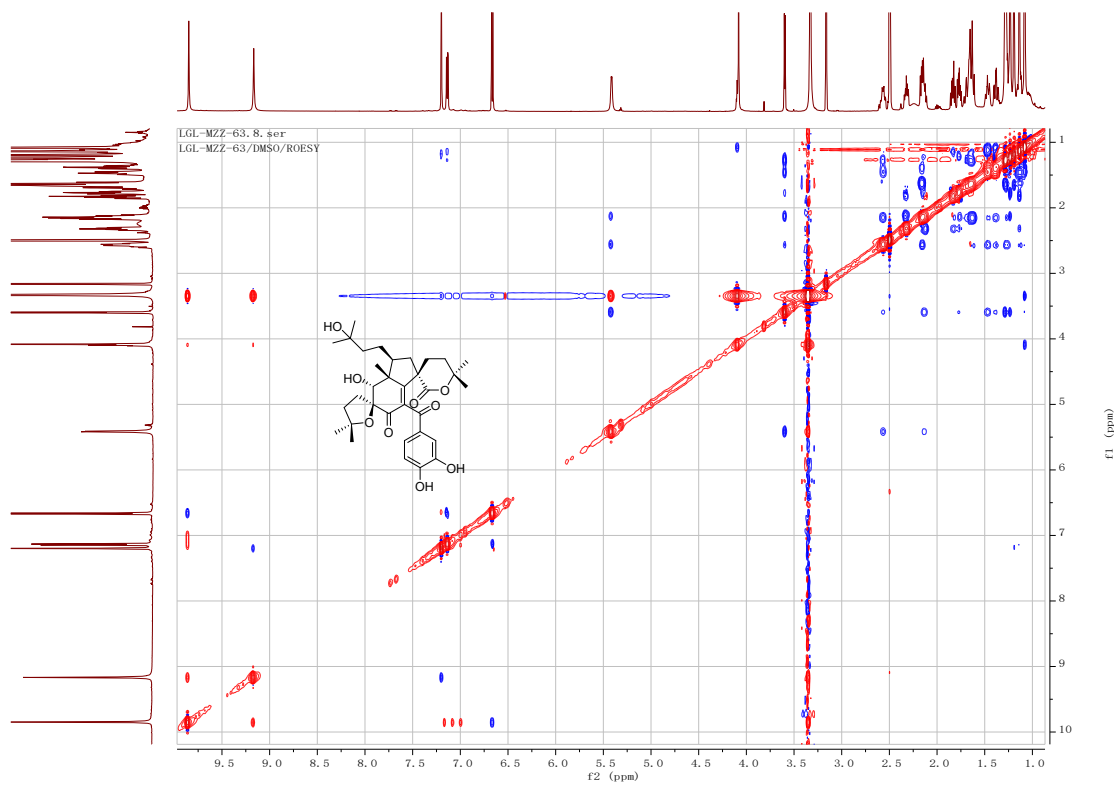

**Fig. S7. The ROESY spectrum of 1 (600 MHz, DMSO- $d_6$ ).**

Thermo Qexactive Focus Report

compound NO. : MII-63  
 Method : LCMS(compound)-low

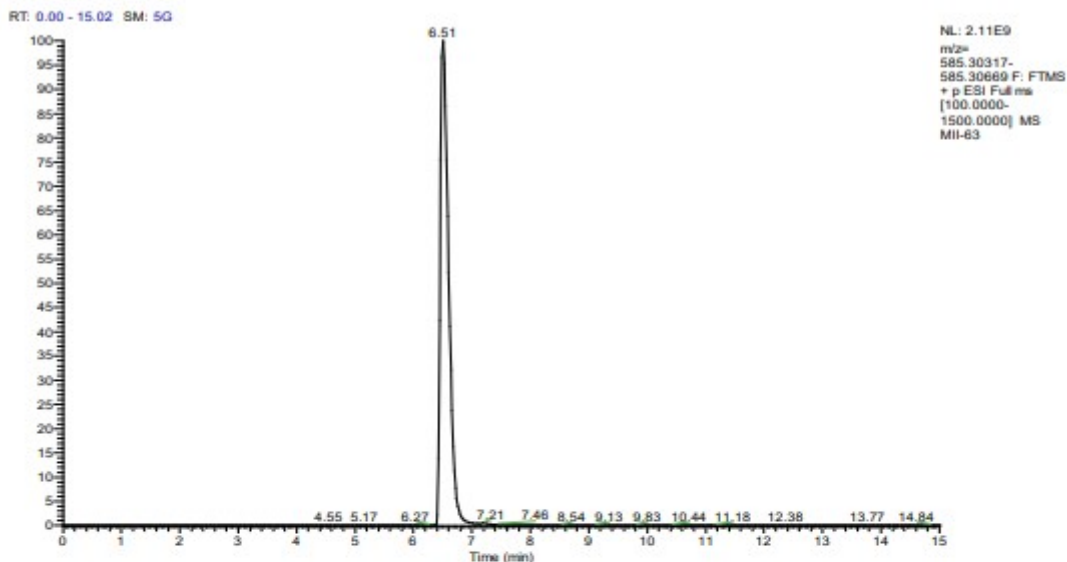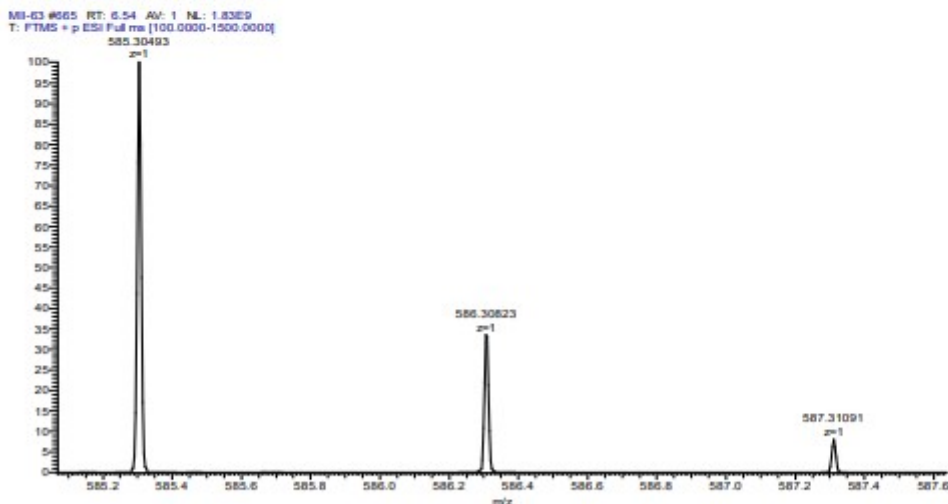

| m/z       | Theo. Mass | Delta (ppm) | RDB equiv. | Composition |     |
|-----------|------------|-------------|------------|-------------|-----|
| 585.30493 | 585.30581  | -1.5        | 11.5       | C33 H45 O9  | M+H |

Fig. S8. The HR-ESI-MS spectrum of 1.

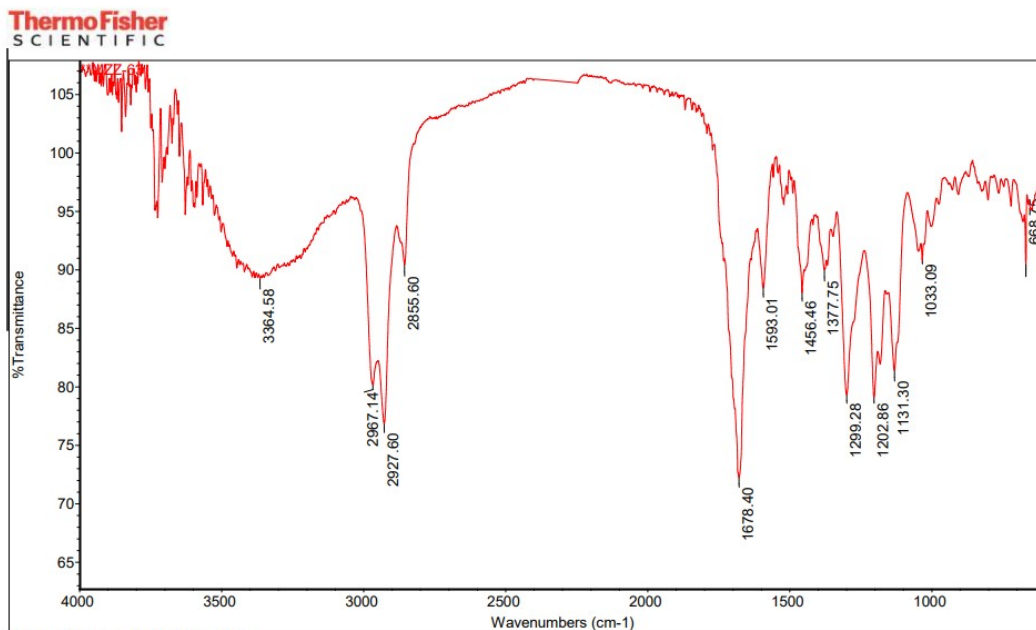

Thermo Nicolet is50 FT-IR ATR  
 \*\*MZZ-63  
 Number of sample scans: 16  
 Number of background scans: 16  
 Resolution: 4.000  
 Sample gain: 1.0  
 Optical velocity: 0.4747  
 Aperture: 150.00

Fig. S9. The IR spectrum of 1.

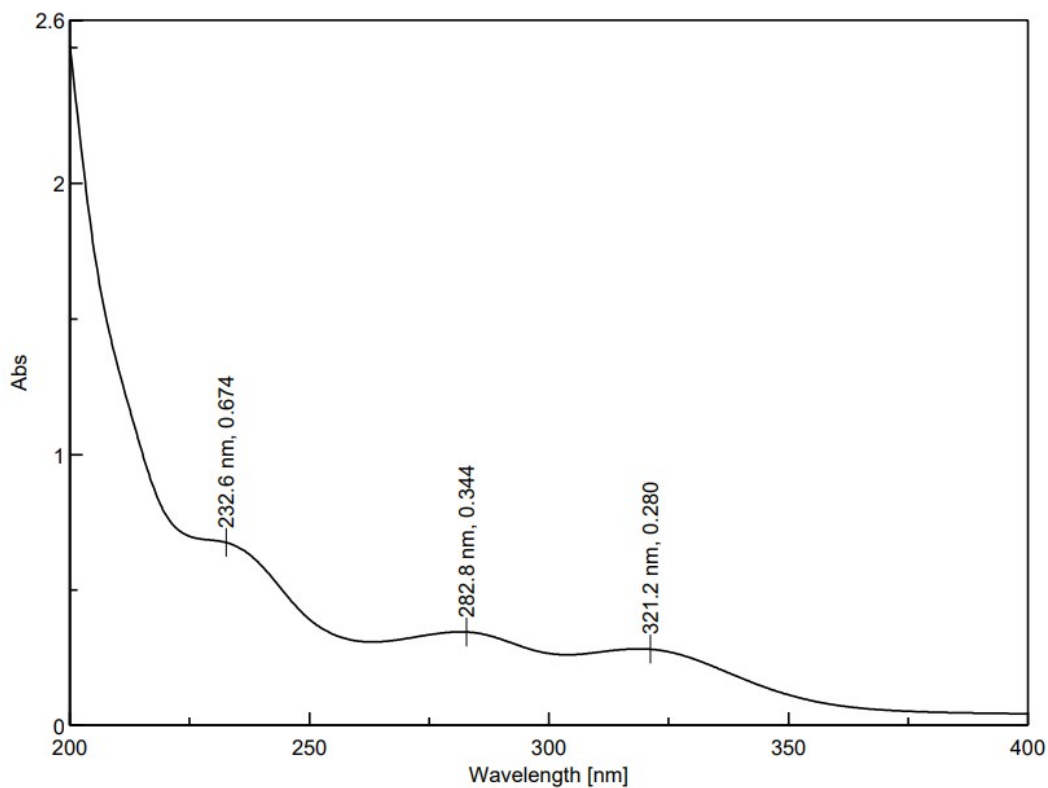

Fig. S10. The UV spectrum of 1.

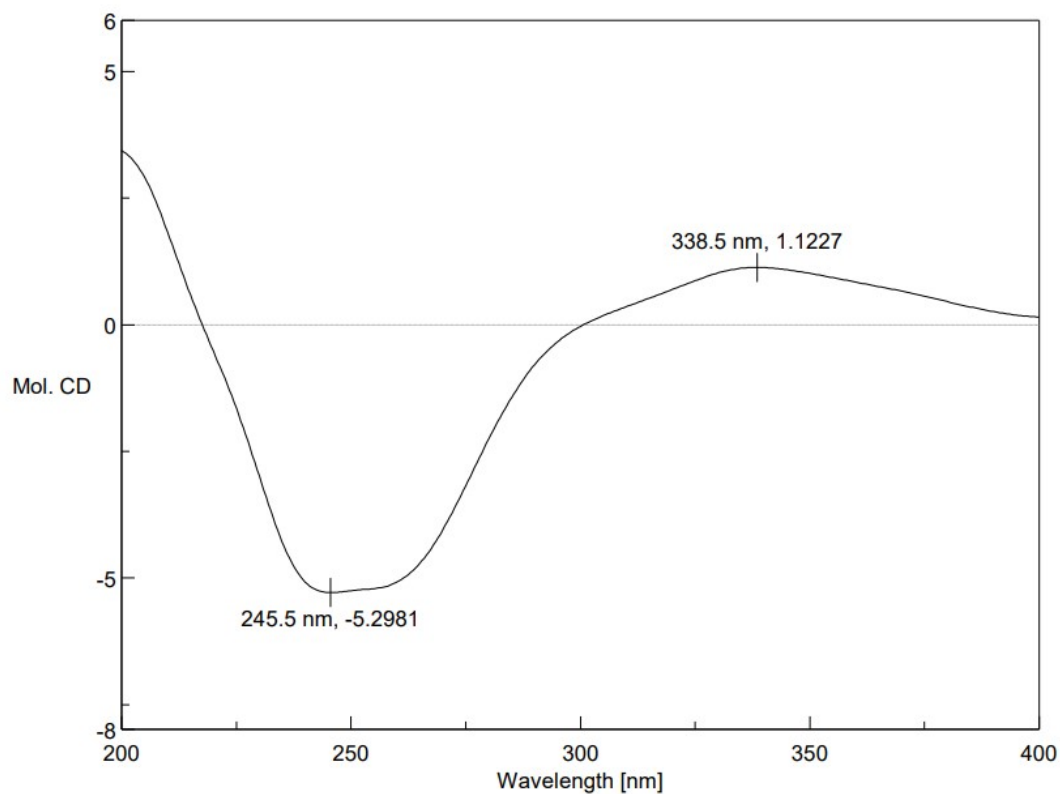

Fig. S11. The experimental ECD spectrum of 1 in CH<sub>3</sub>OH.

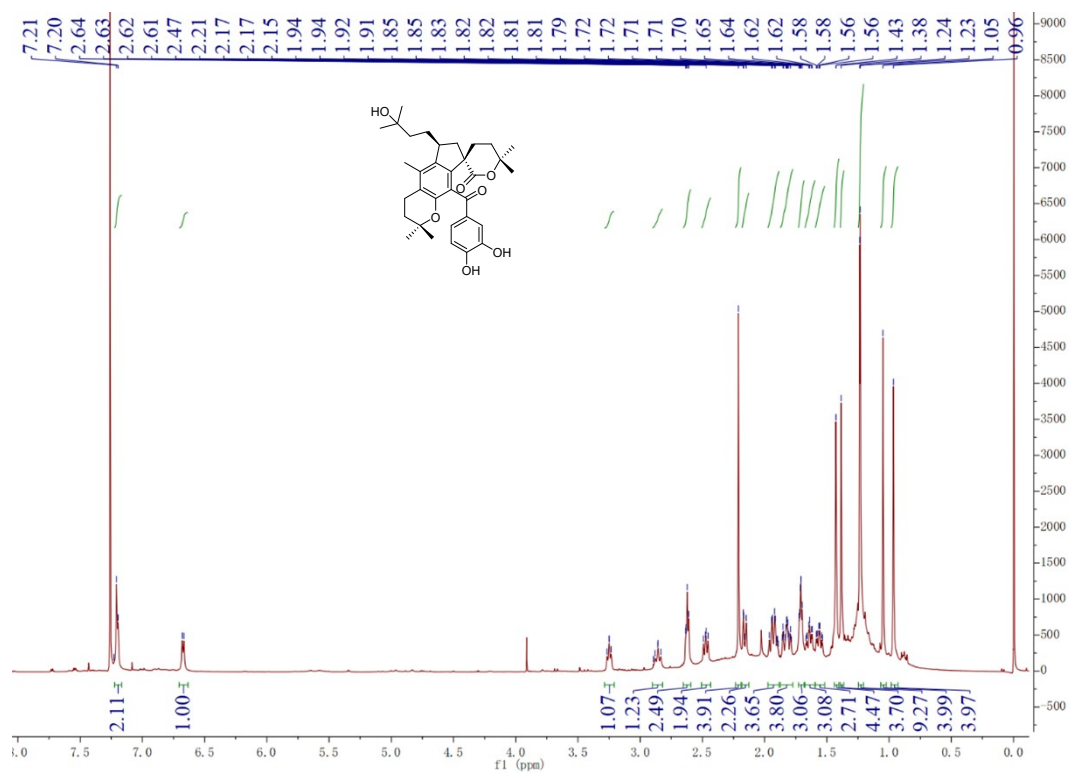

Fig. S12. The <sup>1</sup>H NMR spectrum of 2 (600 MHz, CDCl<sub>3</sub>).

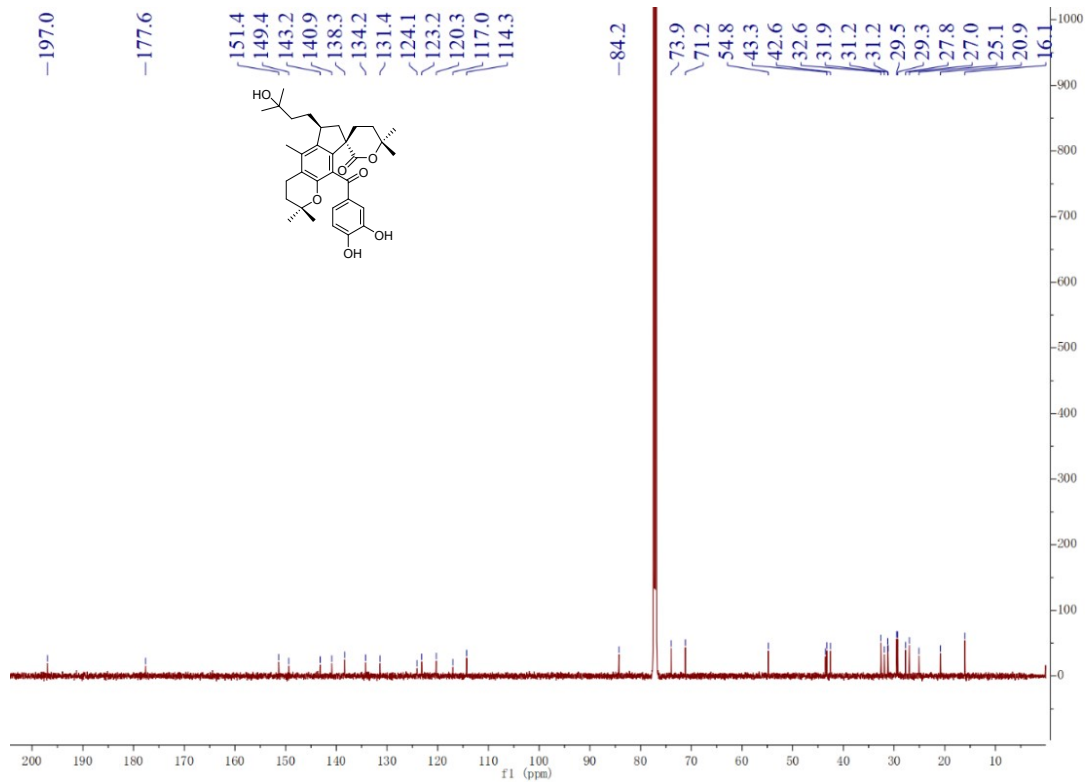

Fig. S13. The  $^{13}\text{C}$  NMR spectrum of 2 (150 MHz,  $\text{CDCl}_3$ ).

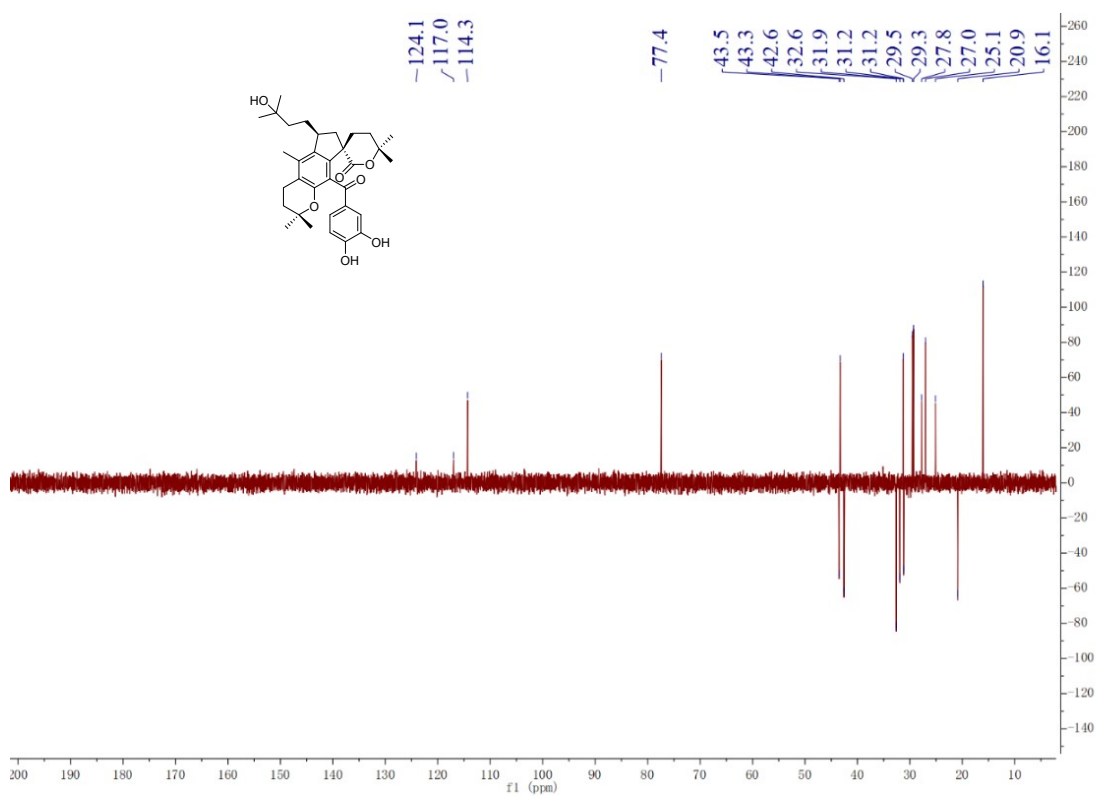

Fig. S14. The DEPT135 spectrum of 2 (600 MHz,  $\text{CDCl}_3$ ).

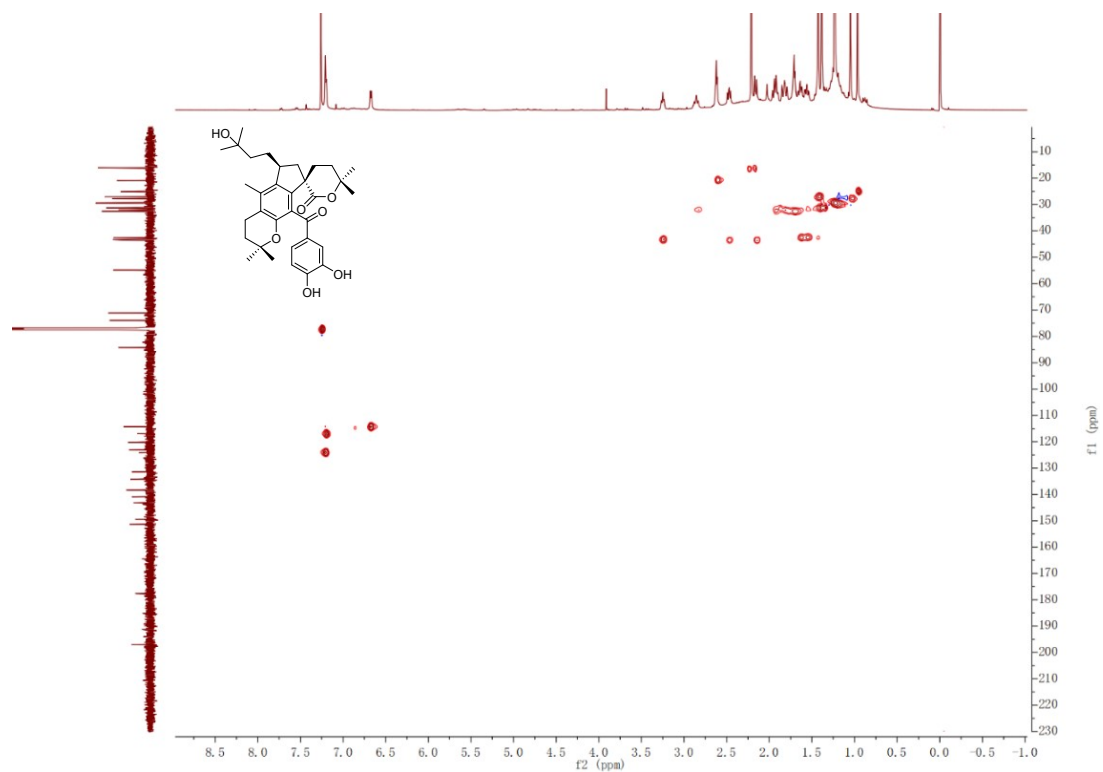

**Fig. S15. The HSQC spectrum of 2 (600 MHz, CDCl<sub>3</sub>).**

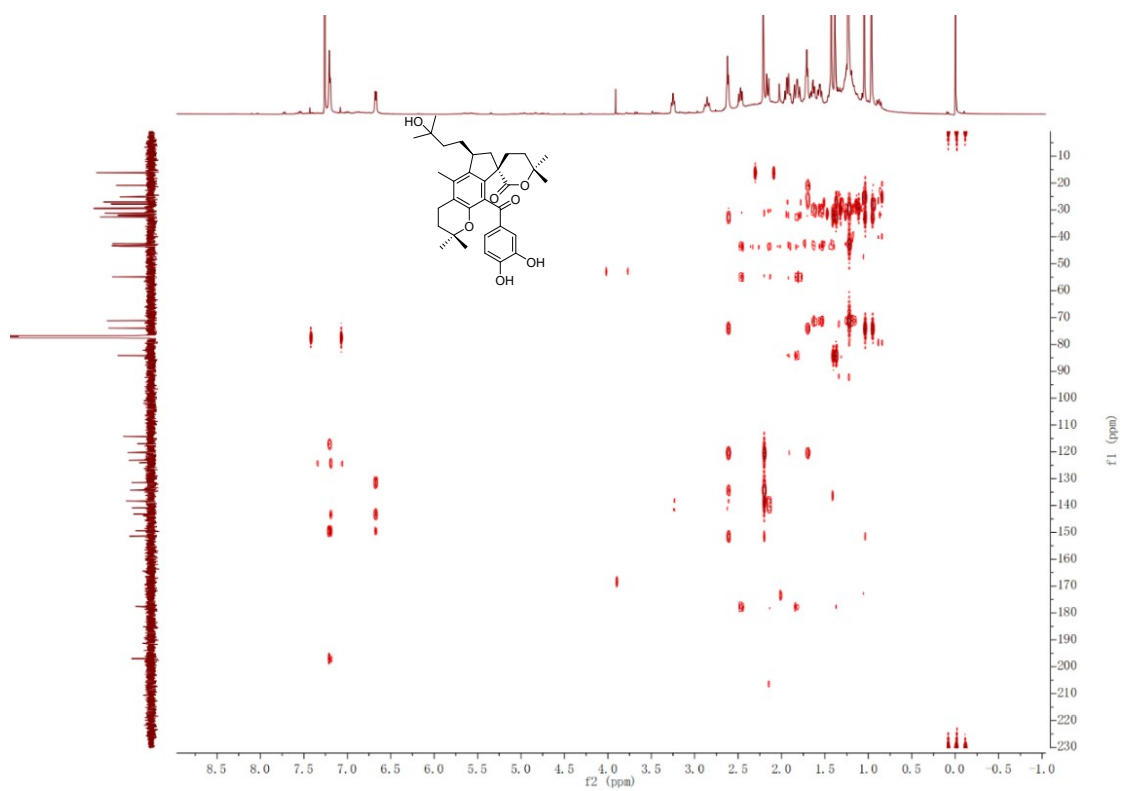

**Fig. S16. The HMBC spectrum of 2 (600 MHz, CDCl<sub>3</sub>).**

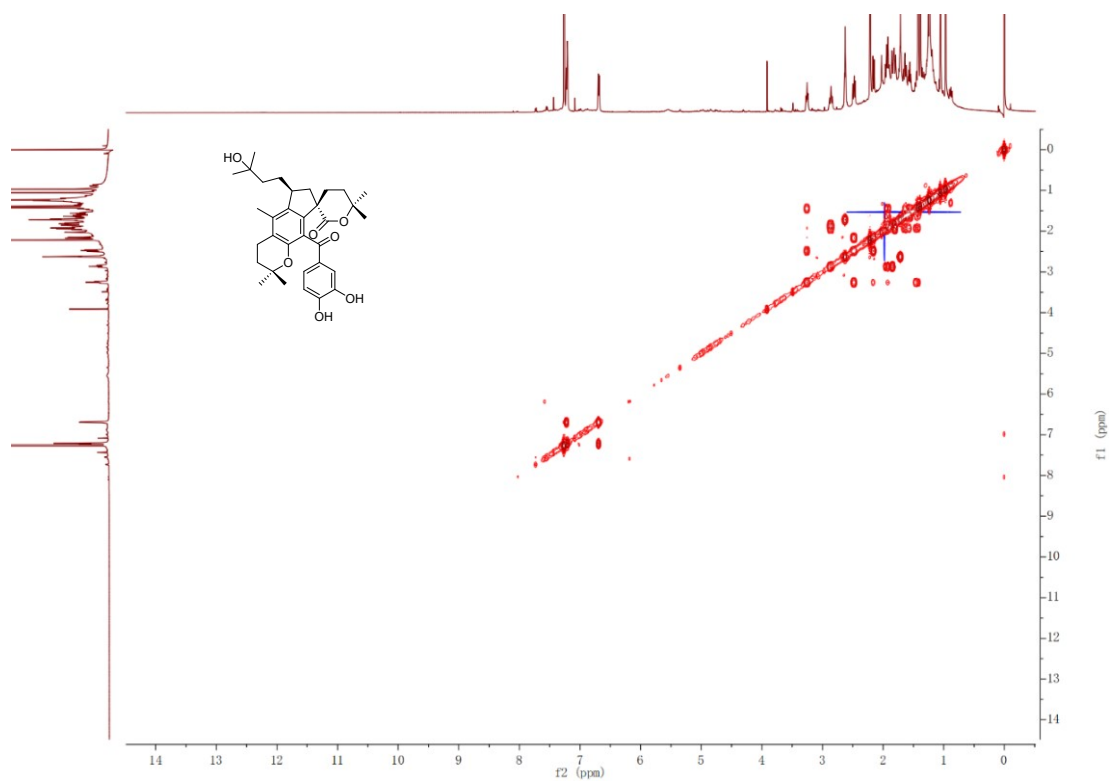

**Fig. S17.** The  $^1\text{H}$ - $^1\text{H}$  COSY spectrum of 2 (600 MHz,  $\text{CDCl}_3$ ).

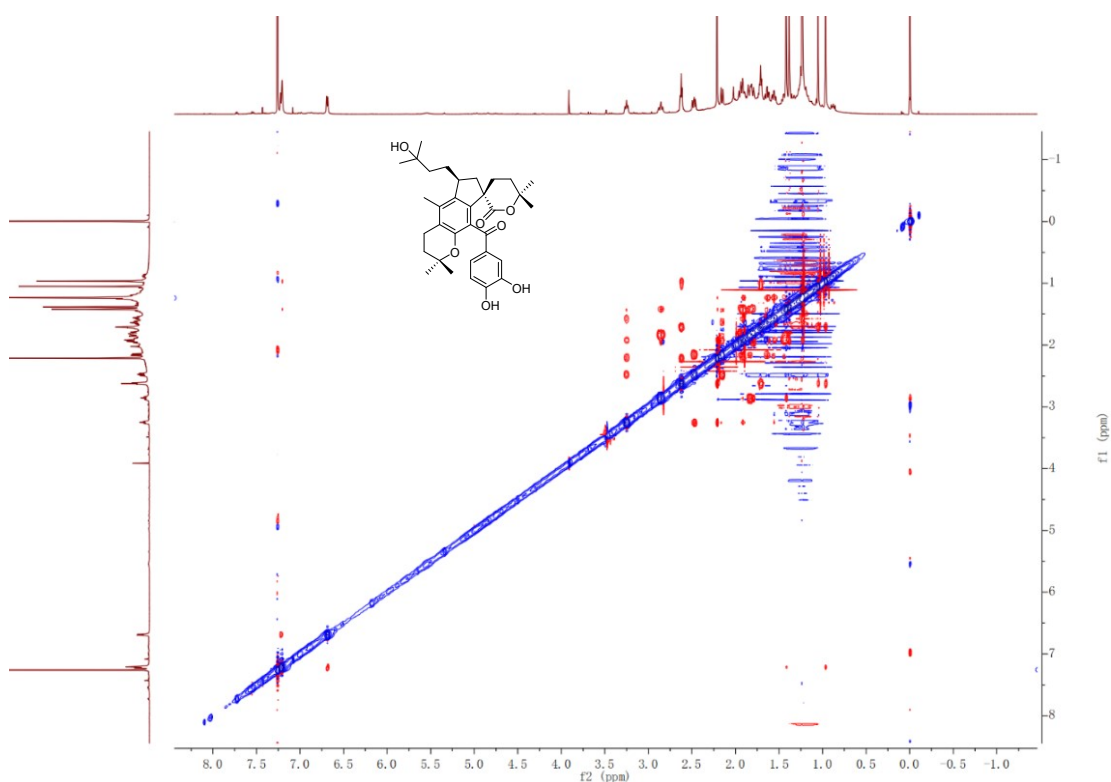

**Fig. S18.** The ROESY spectrum of 2 (600 MHz,  $\text{CDCl}_3$ ).

Thermo Qexactive Focus Report

compound NO. : MZZ-64  
 Method : LCMS(compound)-low

RT: 0.00 - 15.01 SM: 7G

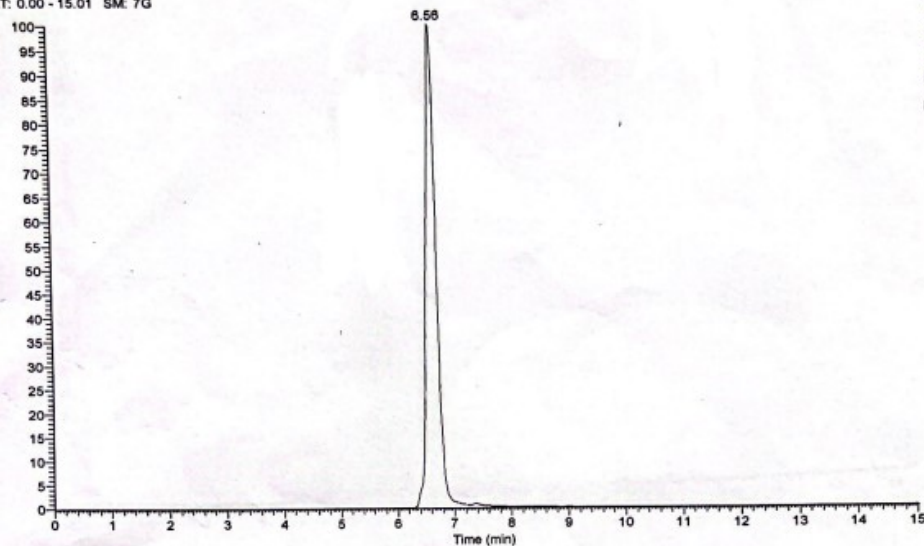

NL: 2.41E9  
 m/z= 551.29625-  
 551.30177 F: FTMS  
 + p ESI Full ms  
 [100.0000-  
 1500.0000] MS  
 MZZ-64

MZZ-64 #661 RT: 6.58 AV: 1 NL: 2.52E9  
 T: FTMS + p ESI Full ms [100.0000-1500.0000]  
 551.29901

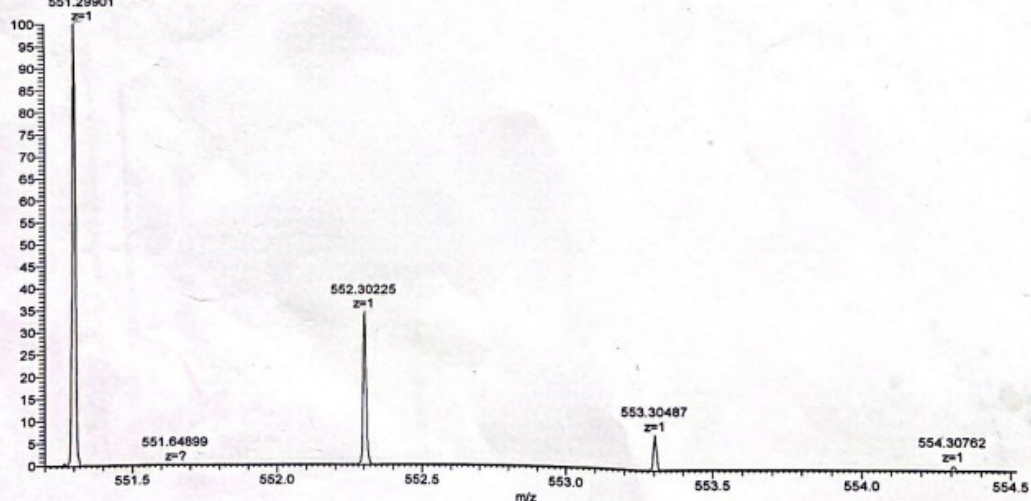

| m/z       | Theo. Mass | Delta (ppm) | RDB equiv. | Composition |     |
|-----------|------------|-------------|------------|-------------|-----|
| 551.29901 | 551.30033  | -2.39       | 12.5       | C33 H43 O7  | M+H |

Fig. S19. The HR-ESI-MS spectrum of 2.



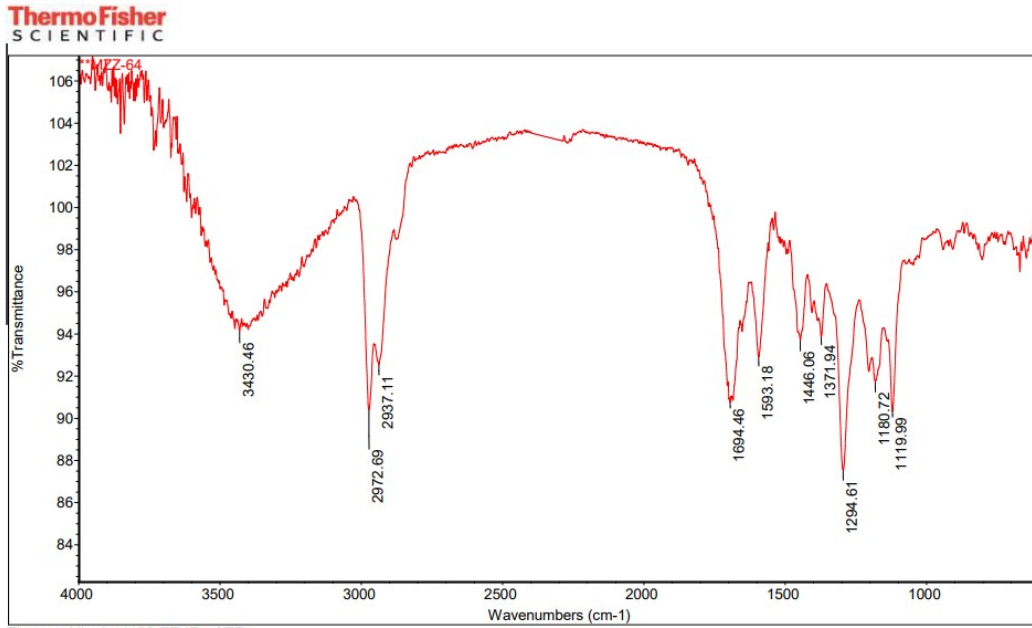

Fig. S20. The IR spectrum of 2.

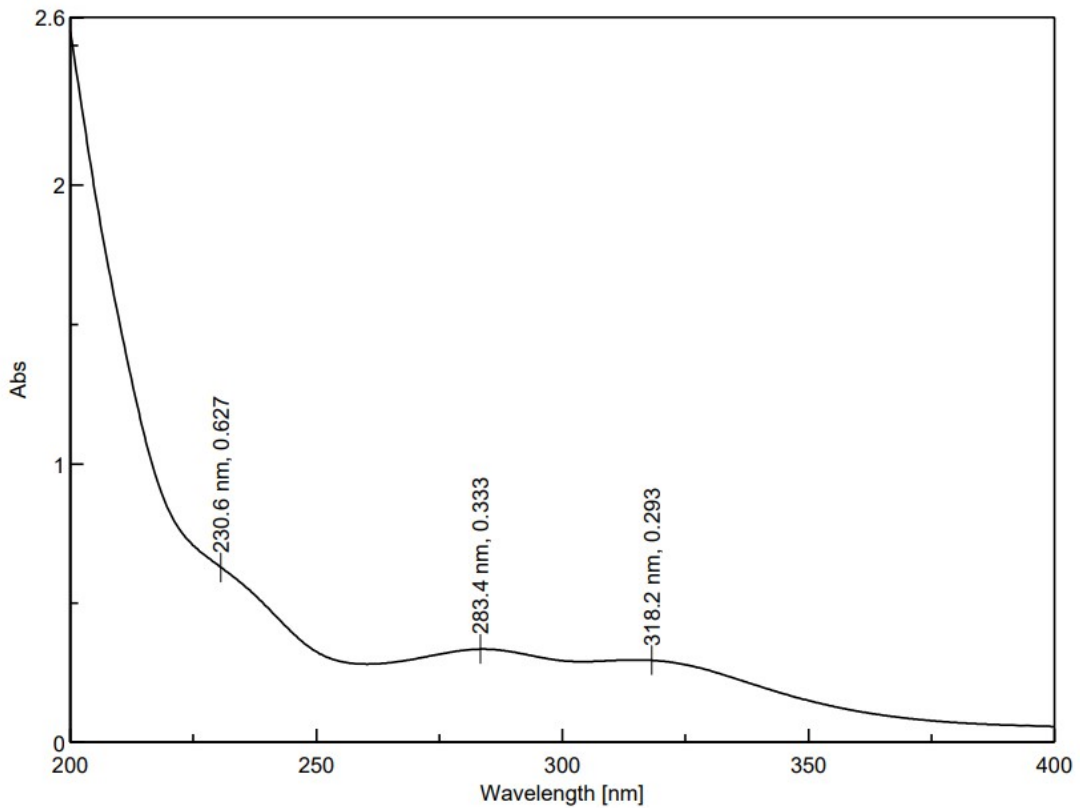

Fig. S21. The UV spectrum of 2.

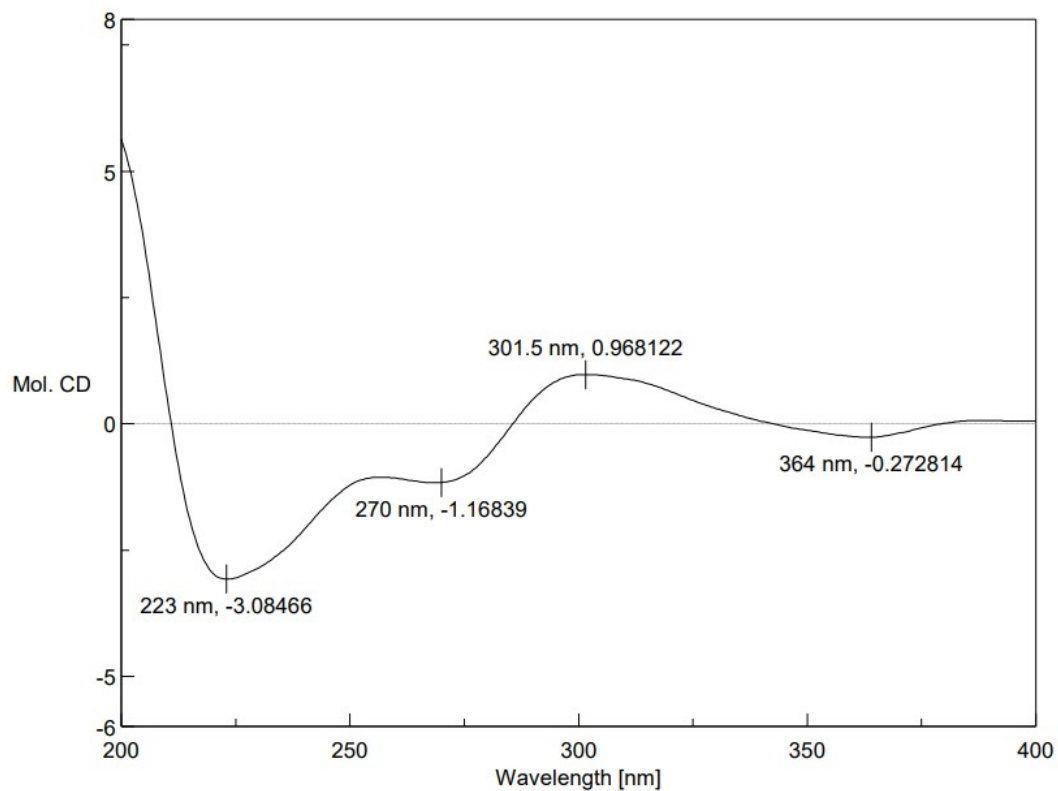

Fig. S22. The experimental ECD spectrum of 2 in CH<sub>3</sub>OH.

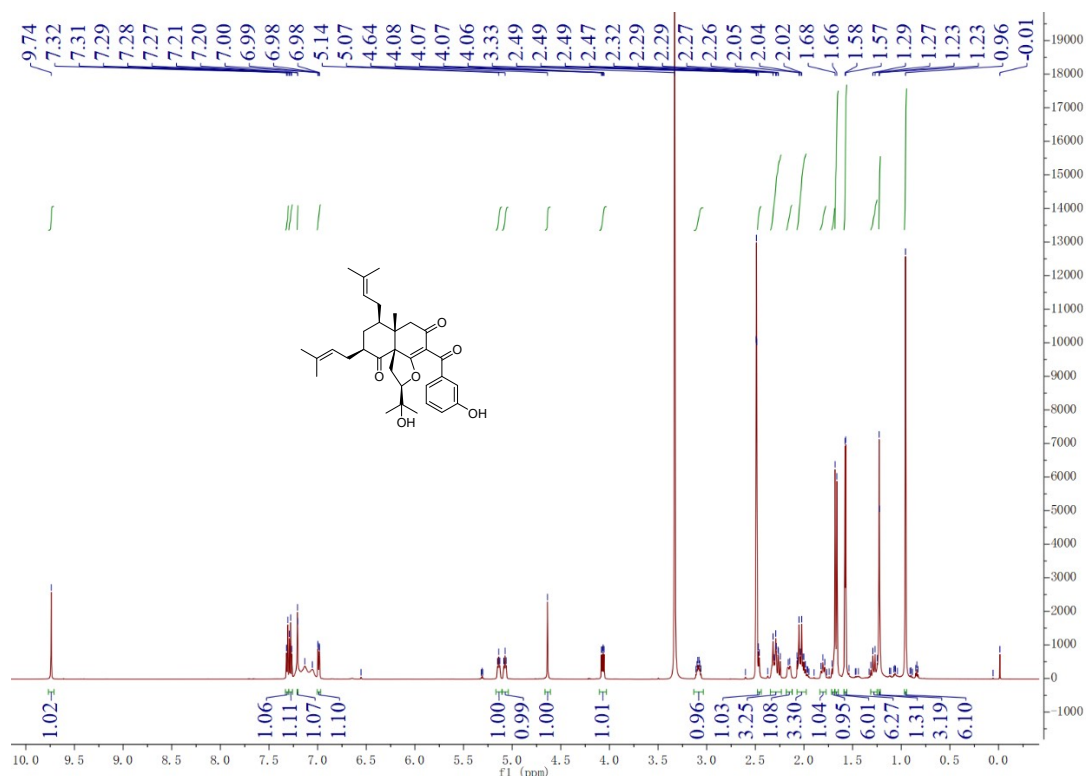

Fig. S23. The <sup>1</sup>H NMR spectrum of 3 (600 MHz, DMSO-*d*<sub>6</sub>).

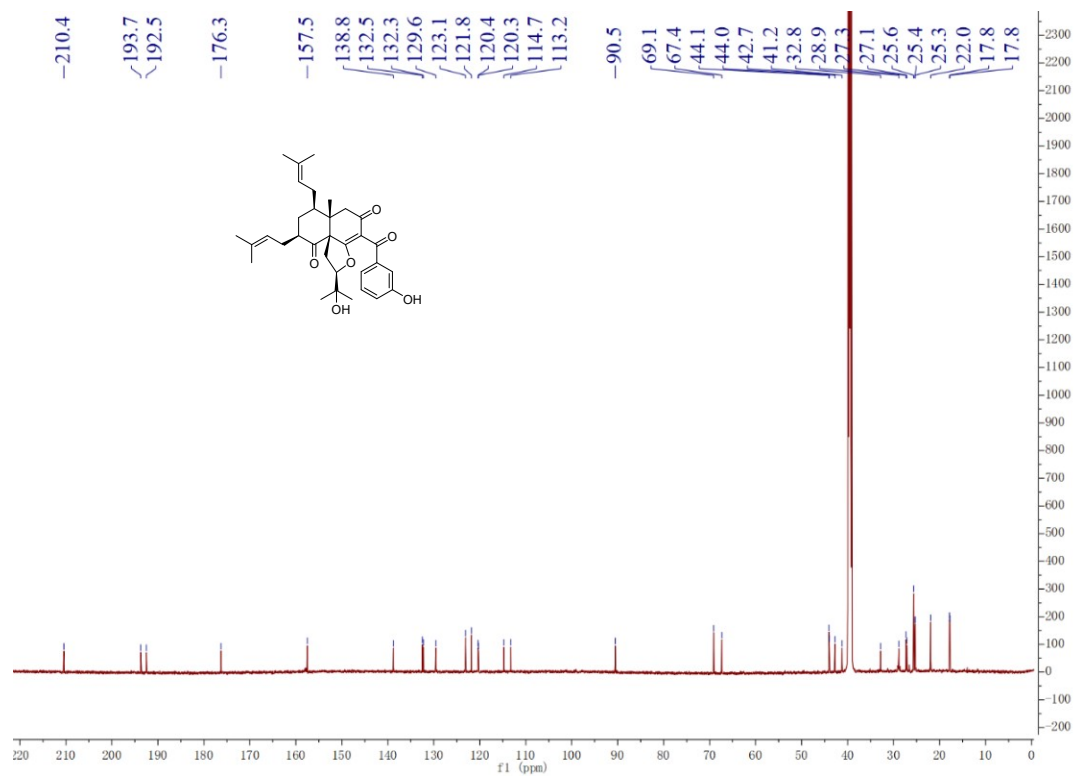

Fig. S24. The  $^{13}\text{C}$  NMR spectrum of 3 (150 MHz,  $\text{DMSO}-d_6$ ).

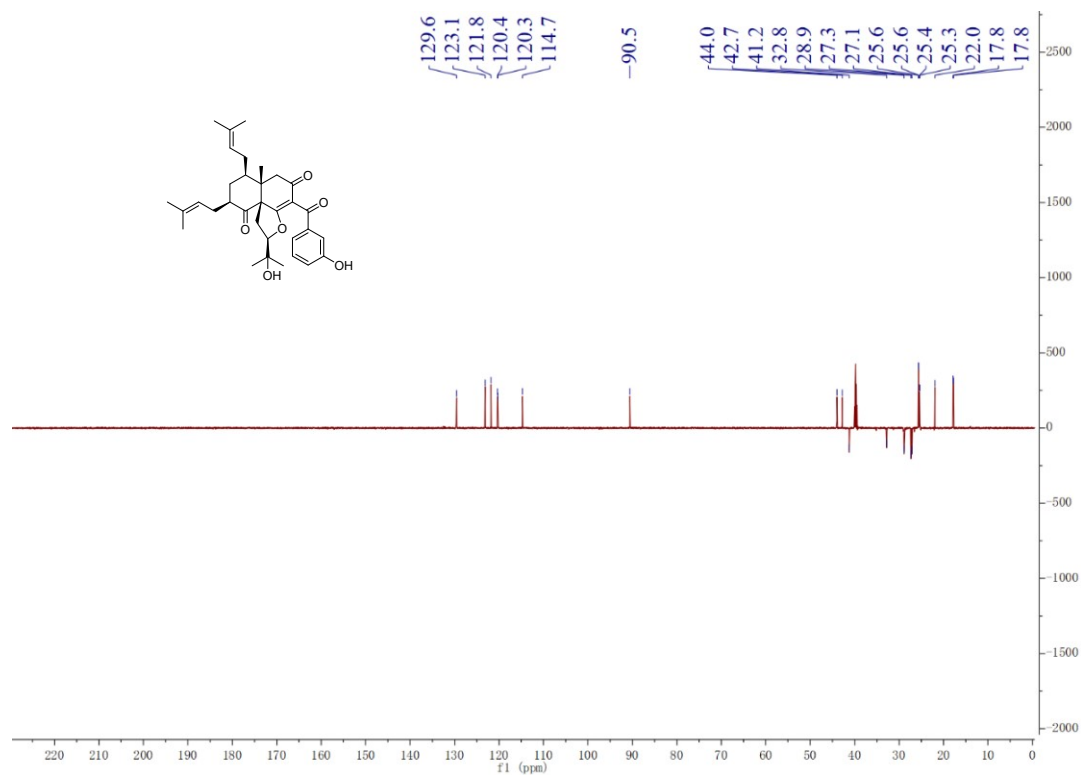

Fig. S25. The DEPT135 spectrum of 3 (600 MHz,  $\text{DMSO}-d_6$ ).

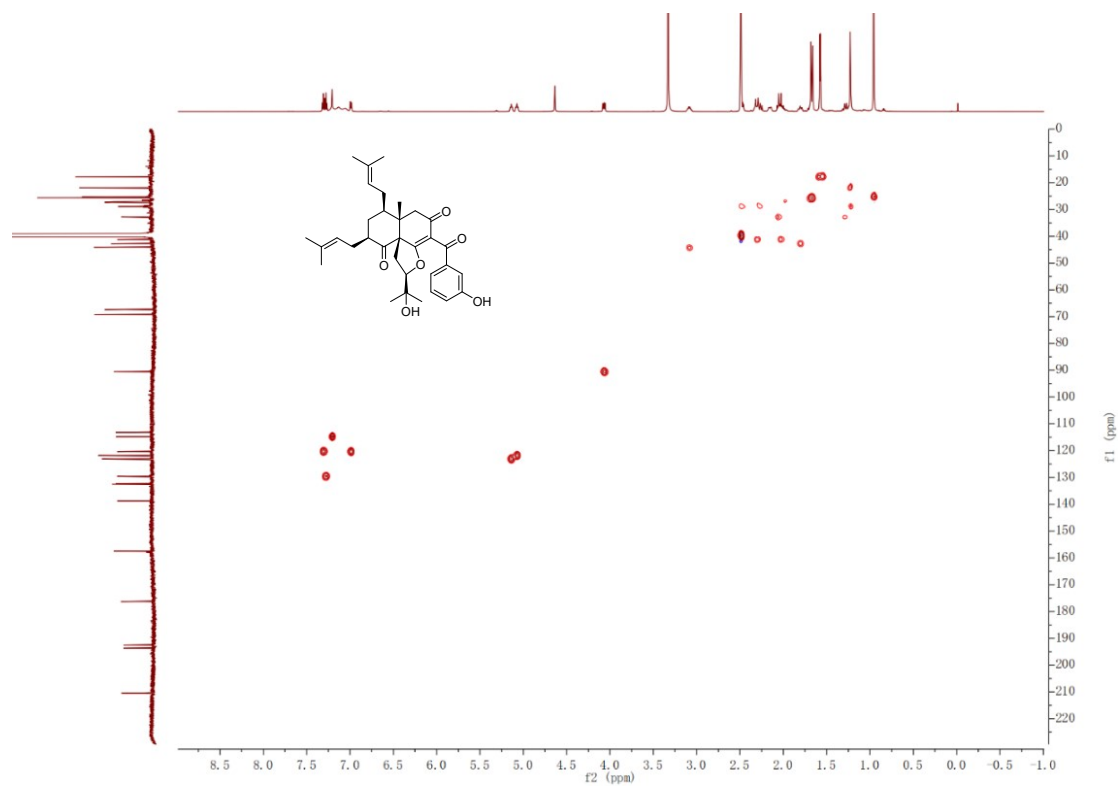

**Fig. S26.** The HSQC spectrum of **3** (600 MHz, DMSO-*d*<sub>6</sub>).

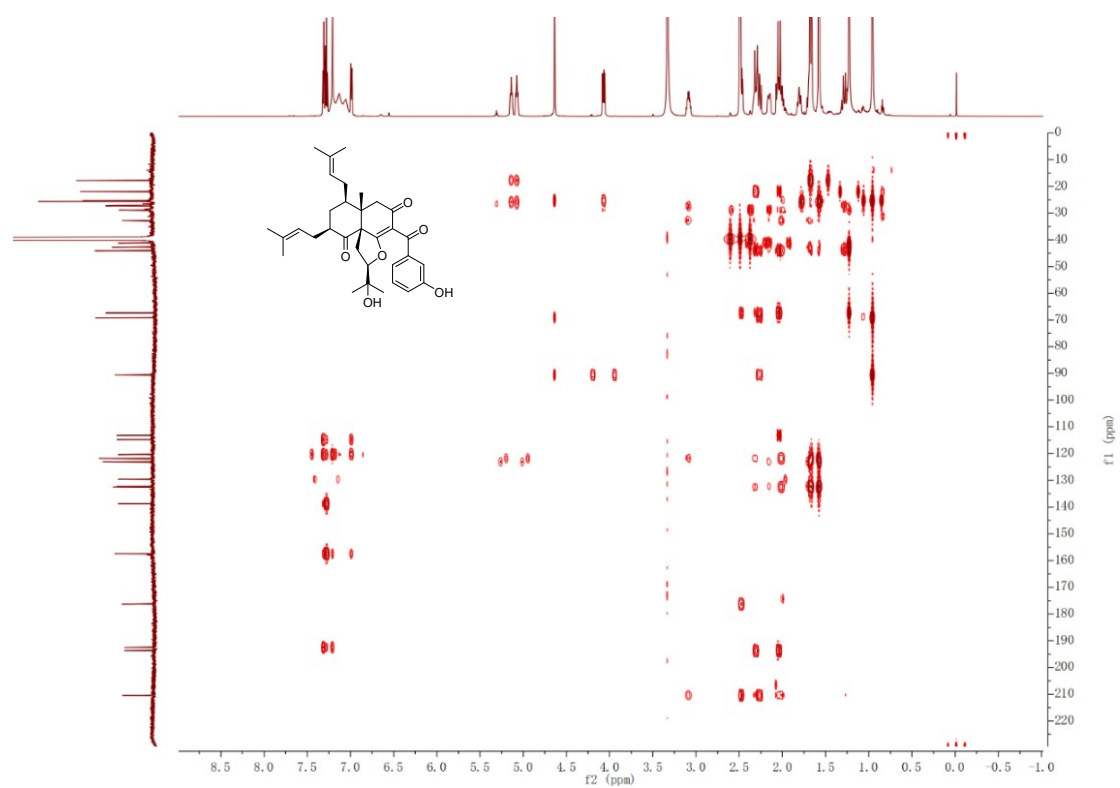

**Fig. S27.** The HMBC spectrum of **3** (600 MHz, DMSO-*d*<sub>6</sub>).

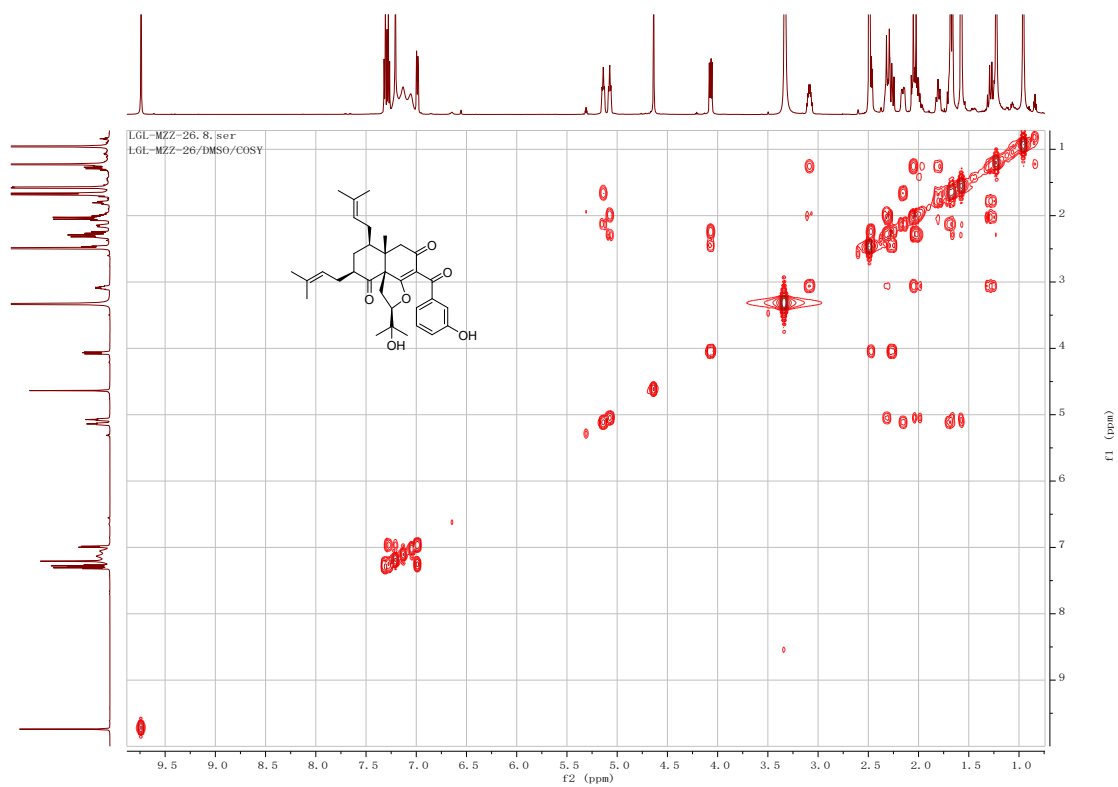

**Fig. S28.** The  $^1\text{H}$ - $^1\text{H}$  COSY spectrum of **3** (600 MHz,  $\text{DMSO-}d_6$ ).

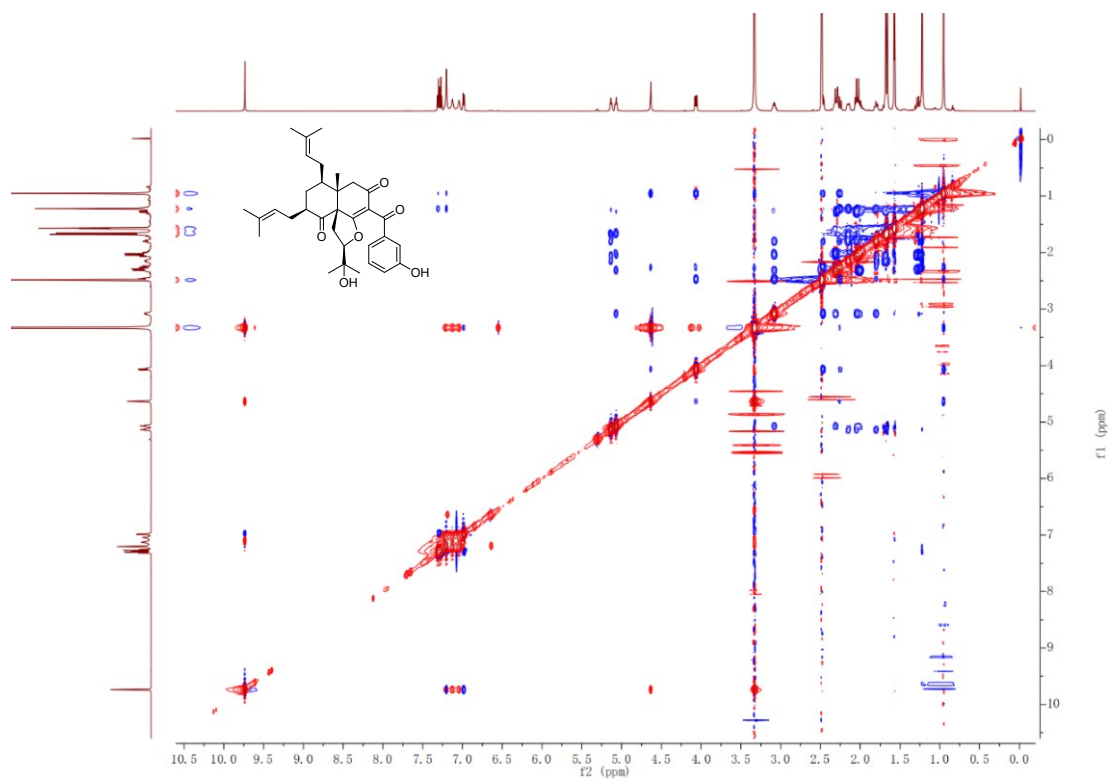

**Fig. S29.** The ROESY spectrum of **3** (600 MHz,  $\text{DMSO-}d_6$ ).

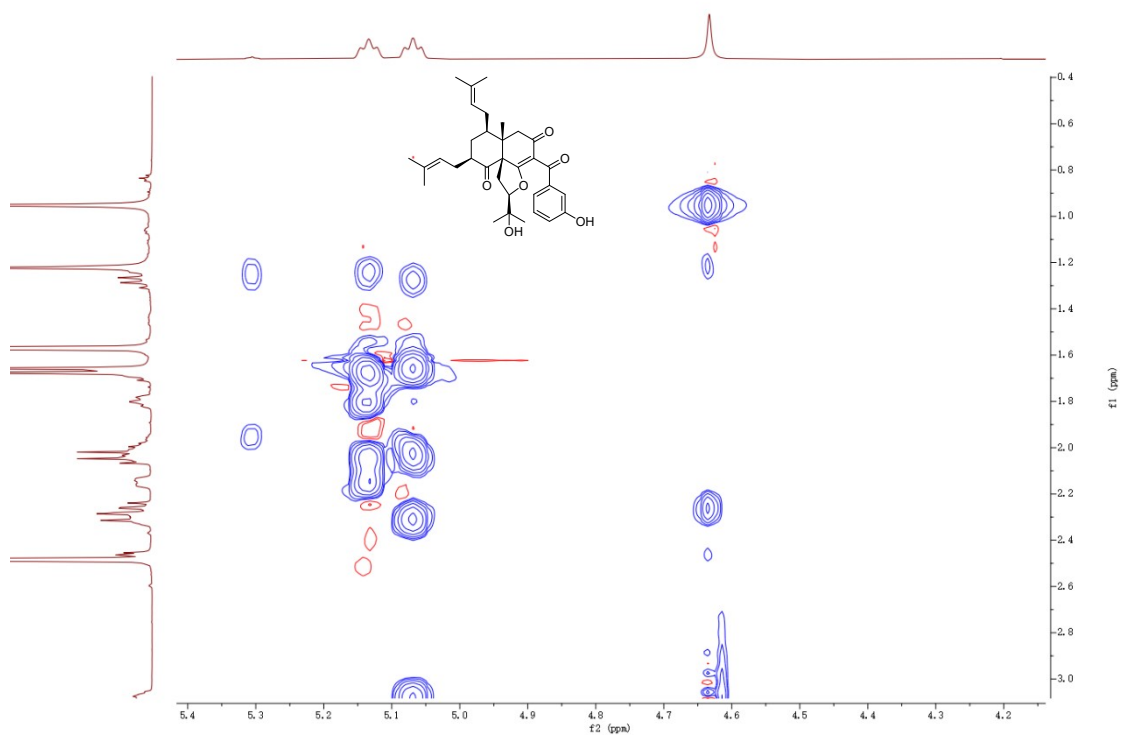

**Fig. S30.** The ROESY spectrum (OH-18/H<sub>2</sub>-16) of 3 (600 MHz, DMSO-*d*<sub>6</sub>).

Thermo Qexactive Focus Report

compound NO. : MII-26  
 Method : LCMS(compound)-low

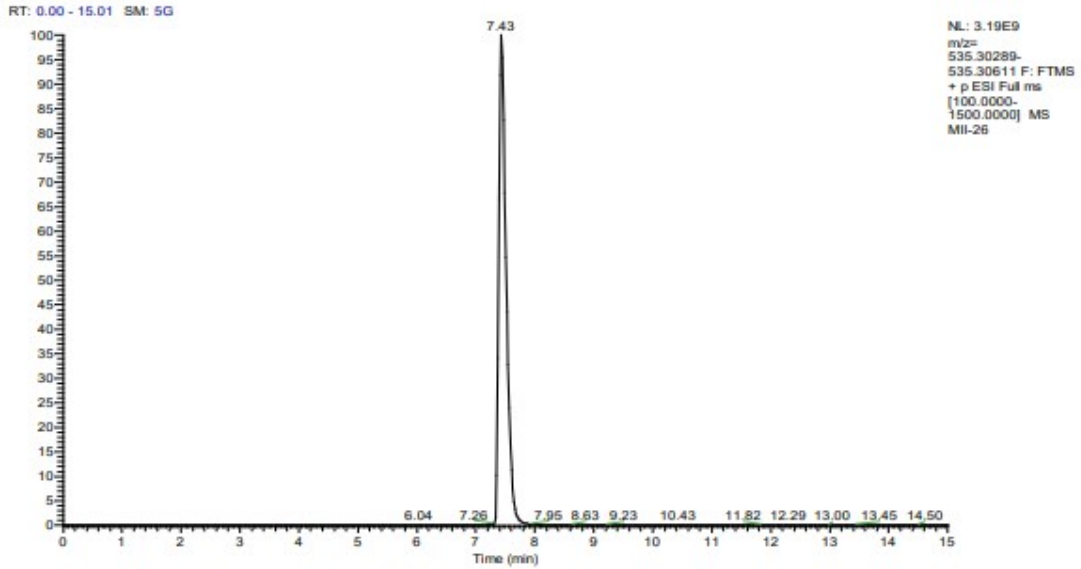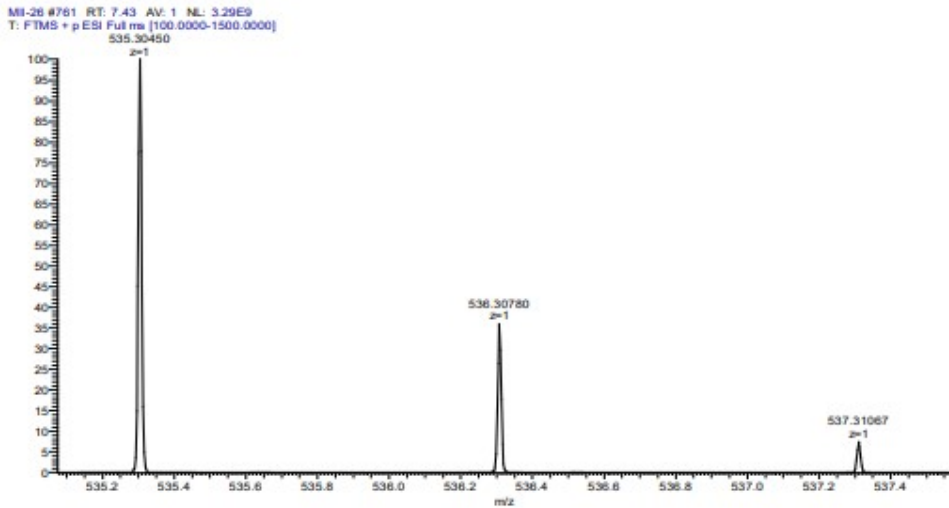

| m/z       | Theo. Mass | Delta (ppm) | RDB equiv. | Composition |     |
|-----------|------------|-------------|------------|-------------|-----|
| 535.30450 | 535.30542  | -1.71       | 12.5       | C33 H43 O6  | M+H |

Fig. S31. The HR-ESI-MS spectrum of 3.

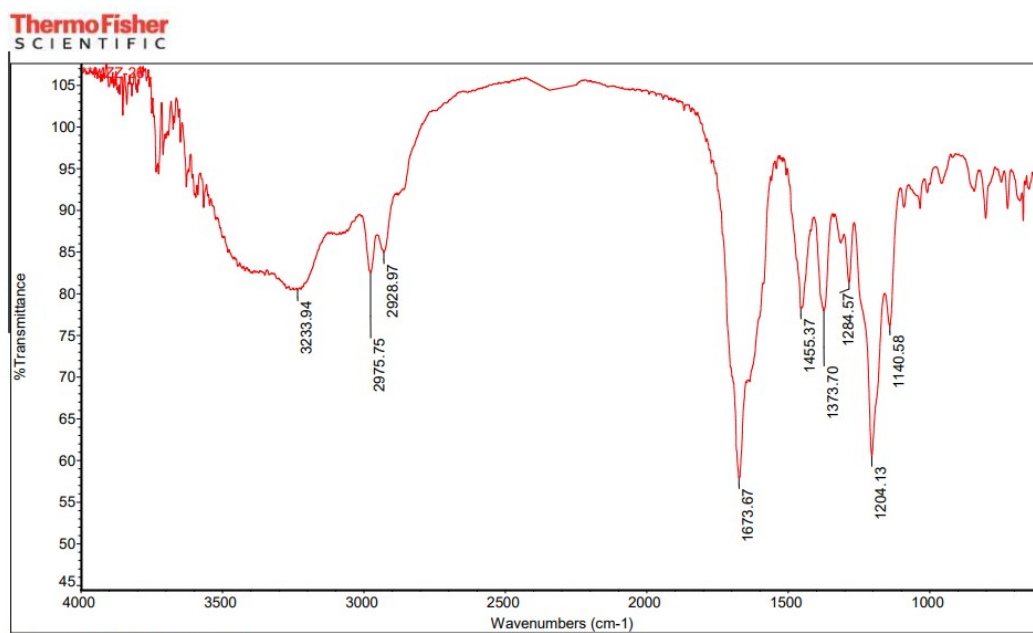

Fig. S32. The IR spectrum of 3.

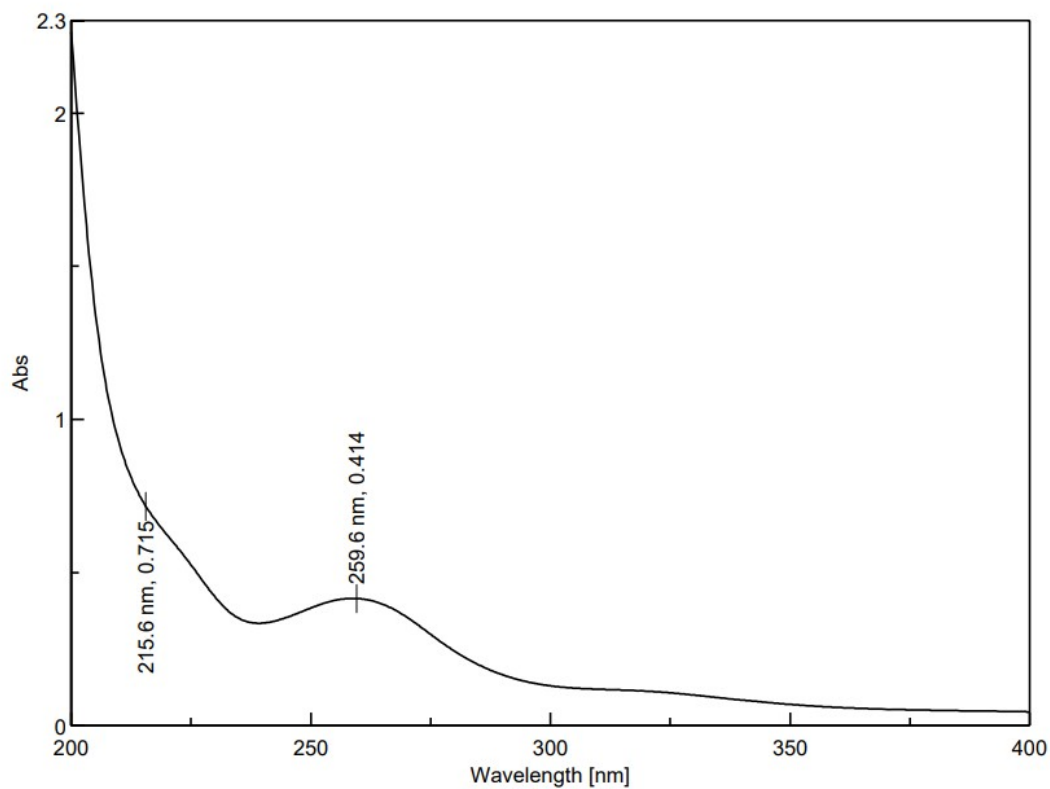

Fig. S33. The UV spectrum of 3.



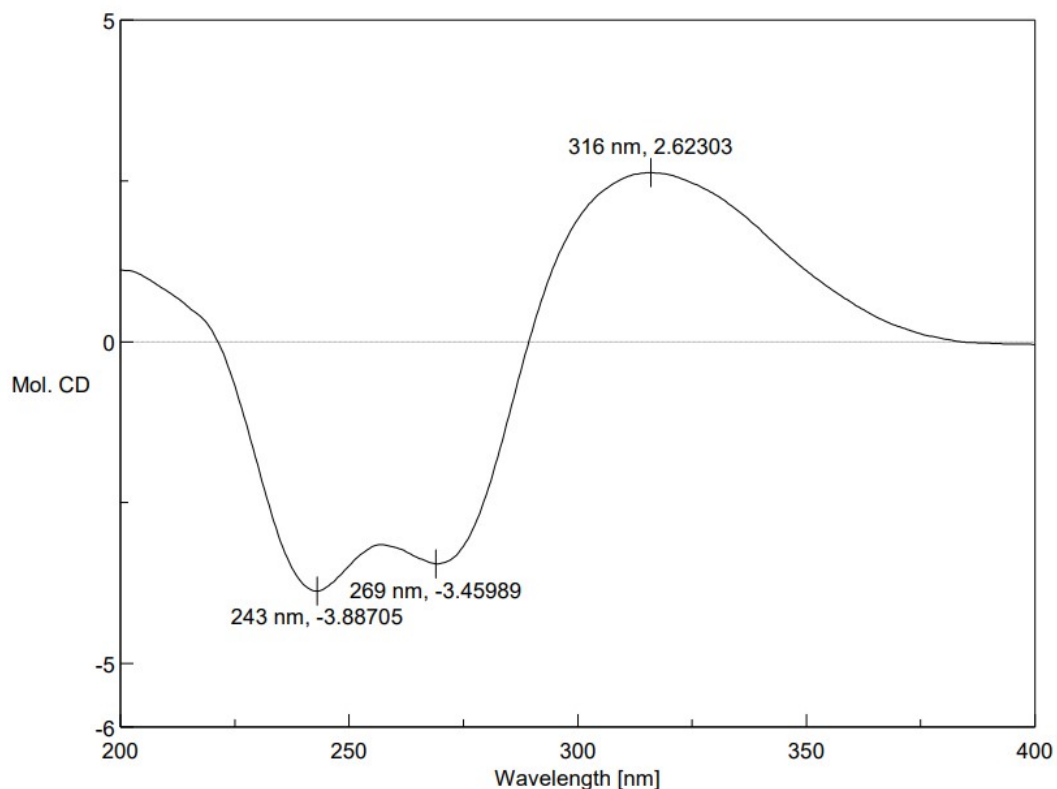

**Fig. S34.** The experimental ECD spectrum of **3** in CH<sub>3</sub>OH.

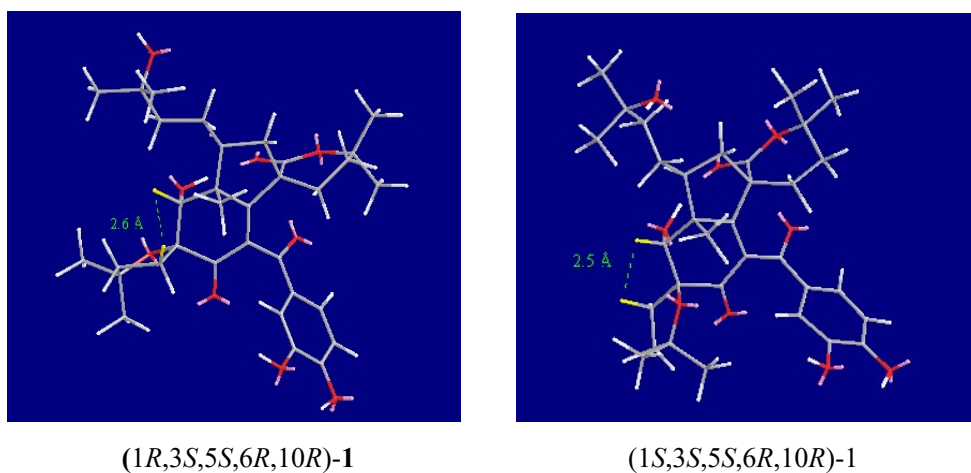

**Fig. S35.** Space distance measurement in ChemBio 3D.

#### ECD calculation method

In consideration of the nature of the structure, the structures of compounds **1** and **3** were simplified (**Fig. S36**). The CONFLEX searches based on molecular mechanics with MMFF94S force fields were performed for compounds **1a** and **3a**, which gave a series of stable conformers.<sup>1</sup> The conformers with Boltzmann-population of over 1% were further optimized by the DFT (density

functional theory) method at the B3LYP/6-31g (d) level in Gaussian 16 program package.<sup>2</sup> The ECD of the conformer of selected conformers was then calculated by the TD-DFT (time-dependent density functional theory) method at the M062X/6-31+g(d,p) level for compound **1a** and the PBE1PBE/6-31+g(d,p) level for compound **3a** with the SMD model in methanol solution, respectively. The calculated ECD curve was generated using SpecDis 1.71.<sup>3</sup>

(3*S*, 5*S*)-**2** was chosen for theoretical study. Conformational analyses were firstly carried out via Monte Carlo searching using molecular mechanism with MMFF force field in the *Spartan 18* program.<sup>4</sup> Within an energy window of 2 Kcal/mol, the result showed 17 lowest energy conformers for (3*S*, 5*S*)-**2**, those conformers were then reoptimized using DFT at the B3LYP/6-31G(d) level in the *Gaussian 09* program.<sup>5</sup> The B3LYP/6-31G(d) harmonic vibrational frequencies were further calculated to confirm their stability, 10 conformers for (3*S*, 5*S*)-**2**, whose relative Gibbs free energies ranged within 0-2 Kcal/mol, were harvested and subjected to next steps.

The electronic excitation energies and rotatory strengths (velocity) of the first 60 excited states of these conformers were calculated using the TDDFT methodology at the M062X/TZVP level in methanol. The ECD spectra were simulated by the overlapping Gaussian function ( $\sigma = 0.3$  eV,  $-15$  nm shifted in wavelength),<sup>6</sup> in which velocity rotatory strengths of the first 8 excited states was adopted. To get the final ECD spectra, the simulated spectra of the lowest energy conformers were averaged according to the Boltzmann distribution theory and their relative Gibbs free energy ( $\Delta G$ ). The theoretical ECD curves of (3*R*, 5*R*)-**2** obtained by directly reversing that of (3*S*, 5*S*)-**2**. Compared to the experimental ECD curve of **2** in the 200–400 nm region, the calculated ECD curve for (3*S*, 5*S*)-**2** showed similar trends.

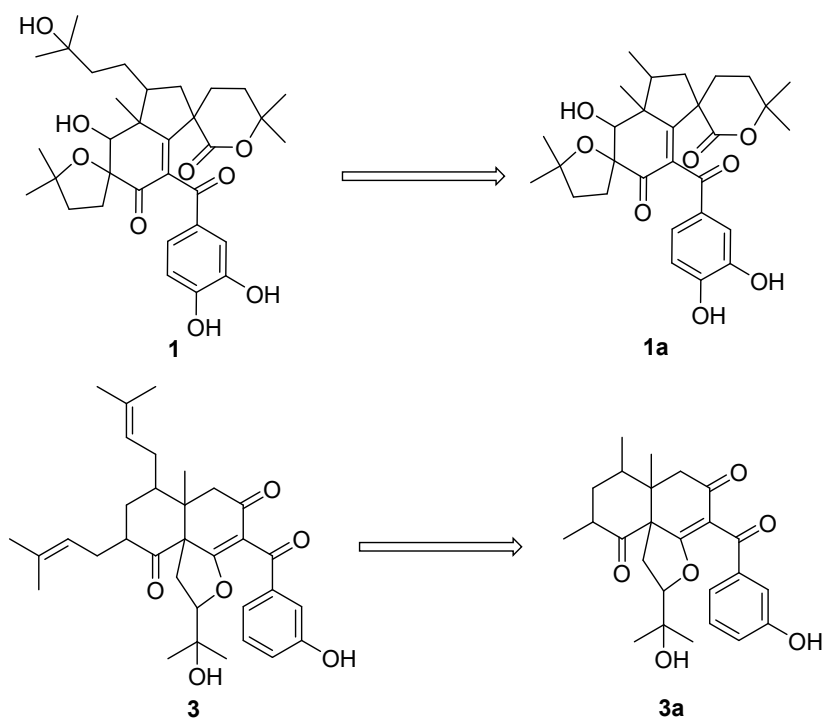

Fig. S36. Simplification of calculation structures.

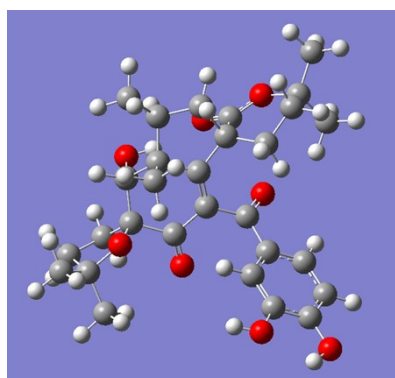

Conf (1S,2S,5S,6R,10R)-1a1 (50.02%)

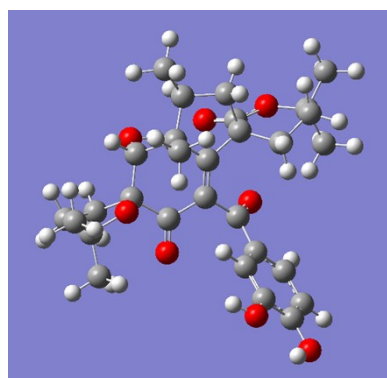

Conf (1S,2S,5S,6R,10R)-1a2 (49.98%)

Fig. S37. DFT-optimized structures for low-energy conformers and Boltzmann distributions of compound (1S,2S,5S,6R,10R)-1a [(1S,2S,5S,6R,10R)-1a1–(1S,2S,5S,6R,10R)-1a2].

Table S2. The Cartesian coordinates for the lowest-energy conformer of (1S,2S,5S,6R,10R)-1a1 in the ECD calculations.

| Number | Atom | X           | Y           | Z           |
|--------|------|-------------|-------------|-------------|
| 1      | C    | 1.38180000  | -2.51662200 | -0.30582800 |
| 2      | C    | 2.30706500  | -1.33260300 | -0.70657000 |
| 3      | C    | 1.50969500  | -0.02050100 | -0.93351000 |
| 4      | C    | 0.11492900  | 0.08687400  | -0.42397600 |
| 5      | C    | -0.46309400 | -0.92864900 | 0.26137500  |
| 6      | C    | 0.34304700  | -2.11907500 | 0.77541900  |
| 7      | C    | -0.67233000 | 1.29028800  | -0.90373700 |
| 8      | C    | -0.26965800 | 2.64962900  | -0.46954000 |
| 9      | O    | 2.01671700  | 0.90805700  | -1.54931600 |

|    |   |             |             |             |
|----|---|-------------|-------------|-------------|
| 10 | O | 3.21102400  | -1.04768500 | 0.38632800  |
| 11 | C | 4.60531400  | -1.16108100 | -0.02218900 |
| 12 | C | 4.54228000  | -2.05159800 | -1.27510400 |
| 13 | C | 3.20154500  | -1.67325900 | -1.91771700 |
| 14 | C | 5.35268700  | -1.80376200 | 1.14594200  |
| 15 | C | 5.15255200  | 0.24106000  | -0.32229600 |
| 16 | O | -1.66661200 | 1.11395700  | -1.60451400 |
| 17 | C | -0.96107800 | 3.75432200  | -0.99167200 |
| 18 | C | -0.64682000 | 5.04755300  | -0.59039400 |
| 19 | C | 0.36615400  | 5.25720700  | 0.34661000  |
| 20 | C | 1.06098900  | 4.15279900  | 0.87815500  |
| 21 | C | 0.74725200  | 2.86559800  | 0.47977700  |
| 22 | C | -1.95683500 | -1.11812000 | 0.55757400  |
| 23 | C | -1.98240600 | -2.42974000 | 1.41653700  |
| 24 | C | -0.73677900 | -3.22545000 | 1.00227000  |
| 25 | C | -2.63235900 | -1.49511500 | -0.77695600 |
| 26 | O | -3.94918500 | -1.29214800 | -0.92246000 |
| 27 | C | -4.77933200 | -0.39730800 | -0.09516900 |
| 28 | C | -4.18185500 | -0.22568400 | 1.30944500  |
| 29 | C | -2.67518000 | 0.04054300  | 1.27596000  |
| 30 | C | 1.00524200  | -1.72530200 | 2.12124600  |
| 31 | C | -0.37034600 | -4.35346800 | 1.96939500  |
| 32 | O | -2.04022400 | -2.11311900 | -1.64335500 |
| 33 | O | 0.68234600  | 6.51528200  | 0.74074800  |
| 34 | O | 0.75056100  | -3.05633200 | -1.45788100 |
| 35 | O | 2.03296800  | 4.47658100  | 1.80057500  |
| 36 | C | -6.13412800 | -1.10387500 | -0.03139700 |
| 37 | C | -4.89042500 | 0.92485900  | -0.86176800 |
| 38 | H | 2.02950900  | -3.30999800 | 0.08805400  |
| 39 | H | 4.54749200  | -3.10829600 | -0.98097100 |
| 40 | H | 5.39265700  | -1.88926500 | -1.94511600 |
| 41 | H | 2.75979300  | -2.47275800 | -2.51348400 |
| 42 | H | 3.30788500  | -0.78821700 | -2.54916700 |
| 43 | H | 5.28963900  | -1.17432600 | 2.04045000  |
| 44 | H | 4.92651900  | -2.78368300 | 1.38435700  |
| 45 | H | 6.41197500  | -1.93642900 | 0.89775300  |
| 46 | H | 4.58598500  | 0.72223500  | -1.12390500 |
| 47 | H | 5.07429300  | 0.87102700  | 0.57119200  |
| 48 | H | 6.20875300  | 0.19177800  | -0.61264500 |
| 49 | H | -1.74131400 | 3.57681400  | -1.72347800 |
| 50 | H | -1.16624300 | 5.91033400  | -0.99498400 |
| 51 | H | 1.29509300  | 2.02706200  | 0.89965000  |
| 52 | H | -1.93551800 | -2.15502900 | 2.47905500  |
| 53 | H | -2.90327900 | -3.00495900 | 1.27670900  |
| 54 | H | -0.93679300 | -3.68029300 | 0.02948300  |
| 55 | H | -4.70239200 | 0.60175700  | 1.80537200  |
| 56 | H | -4.38656200 | -1.12553000 | 1.90257000  |
| 57 | H | -2.47943900 | 0.99400400  | 0.78261700  |
| 58 | H | -2.28375800 | 0.12457800  | 2.29657000  |
| 59 | H | 1.63660100  | -2.54069400 | 2.48811400  |
| 60 | H | 1.63727000  | -0.84513600 | 2.01376900  |
| 61 | H | 0.24473500  | -1.51816700 | 2.88292100  |
| 62 | H | -1.16762700 | -5.10563500 | 1.98759000  |
| 63 | H | 0.54872200  | -4.86250900 | 1.65681500  |
| 64 | H | -0.22892900 | -3.99759600 | 2.99590900  |
| 65 | H | 1.42806600  | 6.44825900  | 1.36338500  |
| 66 | H | -0.09908600 | -2.59858800 | -1.62677800 |
| 67 | H | 2.58167500  | 3.69885500  | 1.98268800  |
| 68 | H | -6.53521800 | -1.25397700 | -1.03821900 |
| 69 | H | -6.04072200 | -2.08175700 | 0.45221800  |

|    |   |             |             |             |
|----|---|-------------|-------------|-------------|
| 70 | H | -6.84742800 | -0.50010200 | 0.54045700  |
| 71 | H | -5.56509200 | 1.60902400  | -0.33424600 |
| 72 | H | -3.91725700 | 1.40483100  | -0.98705300 |
| 73 | H | -5.29831500 | 0.73850500  | -1.85992200 |

**Table S3. The Cartesian coordinates for the lowest-energy conformer of (1*S*,2*S*,5*S*,6*R*,10*R*)-1a2 in the ECD calculations.**

| Number | Atom | X           | Y           | Z           |
|--------|------|-------------|-------------|-------------|
| 1      | C    | 1.37942900  | -2.51808900 | -0.30511200 |
| 2      | C    | 2.30562700  | -1.33499700 | -0.70661200 |
| 3      | C    | 1.50935700  | -0.02245800 | -0.93443800 |
| 4      | C    | 0.11498200  | 0.08660300  | -0.42432300 |
| 5      | C    | -0.46397300 | -0.92807900 | 0.26147900  |
| 6      | C    | 0.34096000  | -2.11916600 | 0.77593800  |
| 7      | C    | -0.67091200 | 1.29084600  | -0.90439400 |
| 8      | C    | -0.26702600 | 2.64967500  | -0.46965200 |
| 9      | O    | 2.01679000  | 0.90512800  | -1.55138300 |
| 10     | O    | 3.20971700  | -1.05006000 | 0.38622900  |
| 11     | C    | 4.60396800  | -1.16412800 | -0.02233600 |
| 12     | C    | 4.54050600  | -2.05568000 | -1.27448900 |
| 13     | C    | 3.19995500  | -1.67725500 | -1.91744100 |
| 14     | C    | 5.35123900  | -1.80599600 | 1.14631600  |
| 15     | C    | 5.15161400  | 0.23758500  | -0.32367600 |
| 16     | O    | -1.66500700 | 1.11564000  | -1.60568500 |
| 17     | C    | -0.95787000 | 3.75515200  | -0.99086700 |
| 18     | C    | -0.64236400 | 5.04797000  | -0.58920200 |
| 19     | C    | 0.37139600  | 5.25643500  | 0.34721200  |
| 20     | C    | 1.06573700  | 4.15123800  | 0.87777800  |
| 21     | C    | 0.75069900  | 2.86444200  | 0.47910400  |
| 22     | C    | -1.95788400 | -1.11600900 | 0.55766100  |
| 23     | C    | -1.98480000 | -2.42723200 | 1.41711500  |
| 24     | C    | -0.74003900 | -3.22435800 | 1.00301300  |
| 25     | C    | -2.63367600 | -1.49298700 | -0.77674600 |
| 26     | O    | -3.95072900 | -1.29016900 | -0.92160100 |
| 27     | C    | -4.77979800 | -0.39336200 | -0.09534700 |
| 28     | C    | -4.18216700 | -0.22111000 | 1.30910800  |
| 29     | C    | -2.67524400 | 0.04367300  | 1.27538500  |
| 30     | C    | 1.00349100  | -1.72565200 | 2.12168700  |
| 31     | C    | -0.37479400 | -4.35258200 | 1.97035400  |
| 32     | O    | -2.04194800 | -2.11106500 | -1.64332100 |
| 33     | O    | 0.68879600  | 6.51407200  | 0.74173100  |
| 34     | O    | 0.74766300  | -3.05814100 | -1.45669300 |
| 35     | O    | 2.03864400  | 4.47390100  | 1.79960000  |
| 36     | C    | -6.13548800 | -1.09815800 | -0.03100600 |
| 37     | C    | -4.88923900 | 0.92818100  | -0.86330100 |
| 38     | H    | 2.02664600  | -3.31168800 | 0.08909900  |
| 39     | H    | 4.54516900  | -3.11212000 | -0.97942300 |
| 40     | H    | 5.39096100  | -1.89432600 | -1.94463000 |
| 41     | H    | 2.75781000  | -2.47712600 | -2.51242300 |
| 42     | H    | 3.30671500  | -0.79289400 | -2.54977100 |
| 43     | H    | 6.41044400  | -1.93925100 | 0.89813700  |
| 44     | H    | 5.28847800  | -1.17571000 | 2.04024300  |
| 45     | H    | 4.92474000  | -2.78553600 | 1.38568300  |
| 46     | H    | 5.07349400  | 0.86837400  | 0.56924300  |
| 47     | H    | 6.20781300  | 0.18765800  | -0.61389200 |
| 48     | H    | 4.58530300  | 0.71826600  | -1.12575600 |
| 49     | H    | -1.73867900 | 3.57856900  | -1.72228500 |
| 50     | H    | -1.16145700 | 5.91131600  | -0.99300500 |

|    |   |             |             |             |
|----|---|-------------|-------------|-------------|
| 51 | H | 1.29817400  | 2.02531100  | 0.89824000  |
| 52 | H | -1.93752700 | -2.15214800 | 2.47952100  |
| 53 | H | -2.90629000 | -3.00150000 | 1.27751900  |
| 54 | H | -0.94049000 | -3.67917400 | 0.03029100  |
| 55 | H | -4.70184800 | 0.60729400  | 1.80433200  |
| 56 | H | -4.38775100 | -1.12024500 | 1.90300700  |
| 57 | H | -2.47867700 | 0.99665500  | 0.78145400  |
| 58 | H | -2.28368500 | 0.12800900  | 2.29592000  |
| 59 | H | 1.63408100  | -2.54153600 | 2.48876700  |
| 60 | H | 1.63634400  | -0.84611300 | 2.01398700  |
| 61 | H | 0.24319700  | -1.51756600 | 2.88330900  |
| 62 | H | 0.54366400  | -4.86272000 | 1.65778700  |
| 63 | H | -0.23287700 | -3.99662700 | 2.99676400  |
| 64 | H | -1.17291400 | -5.10384500 | 1.98881600  |
| 65 | H | 1.43467800  | 6.44622600  | 1.36408300  |
| 66 | H | -0.10090100 | -2.59877800 | -1.62659400 |
| 67 | H | 2.58584600  | 3.69525400  | 1.98227000  |
| 68 | H | -6.04341800 | -2.07563100 | 0.45368500  |
| 69 | H | -6.84813600 | -0.49285900 | 0.54002500  |
| 70 | H | -6.53653800 | -1.24886300 | -1.03775500 |
| 71 | H | -5.29717700 | 0.74125300  | -1.86132500 |
| 72 | H | -5.56317800 | 1.61367000  | -0.33658300 |
| 73 | H | -3.91551900 | 1.40693500  | -0.98898800 |

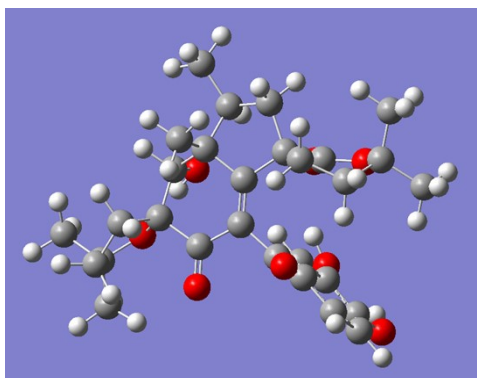

Conf (1*R*,2*S*,5*S*,6*R*,10*R*)-1a1 (99.90%)

Fig. S38. DFT-optimized structures for low-energy conformers and Boltzmann distributions of compound (1*R*,2*S*,5*S*,6*R*,10*R*)-1a [(1*R*,2*S*,5*S*,6*R*,10*R*)-1a1].

Table S4. The Cartesian coordinates for the lowest-energy conformer of (1*R*,2*S*,5*S*,6*R*,10*R*)-1a1 in the ECD calculations.

| Number | Atom | X           | Y           | Z           |
|--------|------|-------------|-------------|-------------|
| 1      | C    | -2.35575700 | -1.33340600 | 0.80127400  |
| 2      | C    | -2.87255200 | -0.32662000 | -0.25415400 |
| 3      | C    | -1.70636400 | 0.44497900  | -0.91725300 |
| 4      | C    | -0.32909000 | -0.10469200 | -0.85691900 |
| 5      | C    | -0.06036300 | -1.28918100 | -0.26737600 |
| 6      | C    | -1.15677900 | -2.17419500 | 0.31505400  |
| 7      | C    | 0.70053300  | 0.79007700  | -1.52714400 |
| 8      | C    | 1.17926000  | 1.98357600  | -0.80053500 |
| 9      | O    | -1.92876500 | 1.50196300  | -1.49353600 |
| 10     | O    | -3.67689100 | 0.61314500  | 0.47613000  |
| 11     | C    | -4.93099800 | 0.93701200  | -0.19508300 |
| 12     | C    | -4.80156500 | 0.26869200  | -1.57792300 |
| 13     | C    | -3.81999400 | -0.88757600 | -1.34241800 |

|    |   |             |             |             |
|----|---|-------------|-------------|-------------|
| 14 | C | -6.07068100 | 0.34090300  | 0.64035600  |
| 15 | C | -5.02959400 | 2.45985800  | -0.27354400 |
| 16 | O | 1.09997600  | 0.49452800  | -2.65013500 |
| 17 | C | 1.99687800  | 2.91291700  | -1.46508200 |
| 18 | C | 2.49203500  | 4.02498100  | -0.79548200 |
| 19 | C | 2.19550700  | 4.20926200  | 0.55805500  |
| 20 | C | 1.38202800  | 3.27573100  | 1.22754700  |
| 21 | C | 0.85935600  | 2.18659600  | 0.55435000  |
| 22 | C | 1.32252100  | -1.93985200 | -0.03905700 |
| 23 | C | 0.97139100  | -3.18103200 | 0.86570000  |
| 24 | C | -0.40408300 | -2.88409400 | 1.48054000  |
| 25 | C | 2.17462100  | -1.02899900 | 0.87402700  |
| 26 | O | 3.49836700  | -0.90122000 | 0.66901300  |
| 27 | C | 4.23686200  | -1.52225200 | -0.43880400 |
| 28 | C | 3.32323700  | -1.60681200 | -1.65978500 |
| 29 | C | 2.02478900  | -2.36357900 | -1.37320900 |
| 30 | C | -1.61682200 | -3.19652300 | -0.75750400 |
| 31 | C | -1.08975000 | -4.10354000 | 2.09811100  |
| 32 | O | 1.68783100  | -0.47430100 | 1.83816800  |
| 33 | O | 2.69902000  | 5.27514500  | 1.22875000  |
| 34 | C | 4.74529100  | -2.88392600 | 0.04848100  |
| 35 | O | -1.95646900 | -0.60582900 | 1.95376900  |
| 36 | O | 1.16518100  | 3.54227100  | 2.56264300  |
| 37 | H | -3.18724500 | -2.01237000 | 1.05791800  |
| 38 | H | -5.76696600 | -0.07552800 | -1.96294100 |
| 39 | H | -4.37663000 | 0.97642900  | -2.29424100 |
| 40 | H | -4.33428600 | -1.77640600 | -0.95847000 |
| 41 | H | -3.29931700 | -1.17394100 | -2.25967500 |
| 42 | H | -6.01730600 | 0.70885600  | 1.67057500  |
| 43 | H | -6.01507300 | -0.75329000 | 0.66747300  |
| 44 | H | -7.04529100 | 0.62423900  | 0.22643700  |
| 45 | H | -5.07188600 | 2.89738900  | 0.73012100  |
| 46 | H | -4.15444100 | 2.85832000  | -0.79267000 |
| 47 | H | -5.93552700 | 2.75921600  | -0.81374700 |
| 48 | H | 2.22808000  | 2.74510000  | -2.51153100 |
| 49 | H | 3.12177900  | 4.75589300  | -1.29282600 |
| 50 | H | 0.24358300  | 1.46811800  | 1.08699300  |
| 51 | H | 0.93357000  | -4.08358800 | 0.24426100  |
| 52 | H | 1.73049800  | -3.35947200 | 1.63440600  |
| 53 | H | -0.26509000 | -2.12937600 | 2.25849400  |
| 54 | C | 5.40392500  | -0.56543700 | -0.68442000 |
| 55 | H | 3.09603200  | -0.59318800 | -2.00193900 |
| 56 | H | 3.86235900  | -2.10198300 | -2.47655700 |
| 57 | H | 1.33984100  | -2.20773000 | -2.21057900 |
| 58 | H | 2.23201000  | -3.43835900 | -1.32916400 |
| 59 | H | -1.91120800 | -2.70401700 | -1.68615700 |
| 60 | H | -0.81795800 | -3.89944800 | -1.01016600 |
| 61 | H | -2.46914800 | -3.78187500 | -0.39505600 |
| 62 | H | -0.49028700 | -4.49428700 | 2.92862200  |
| 63 | H | -2.07408300 | -3.84245900 | 2.50352700  |
| 64 | H | -1.22303600 | -4.91870700 | 1.37717200  |
| 65 | H | 2.41330500  | 5.19034500  | 2.15638100  |
| 66 | H | 5.33859100  | -2.75826300 | 0.95958000  |
| 67 | H | 3.92571100  | -3.57389900 | 0.27085200  |
| 68 | H | 5.38031000  | -3.34629400 | -0.71554600 |
| 69 | H | -2.64724400 | 0.07212700  | 2.06748100  |
| 70 | H | 0.88172700  | 2.72660900  | 3.00486300  |
| 71 | H | 5.03261600  | 0.42371500  | -0.96869300 |
| 72 | H | 6.04152600  | -0.94501500 | -1.49036800 |
| 73 | H | 6.01145100  | -0.45969000 | 0.21995000  |

### Conformers and energy analysis of (3*S*, 5*S*)-2

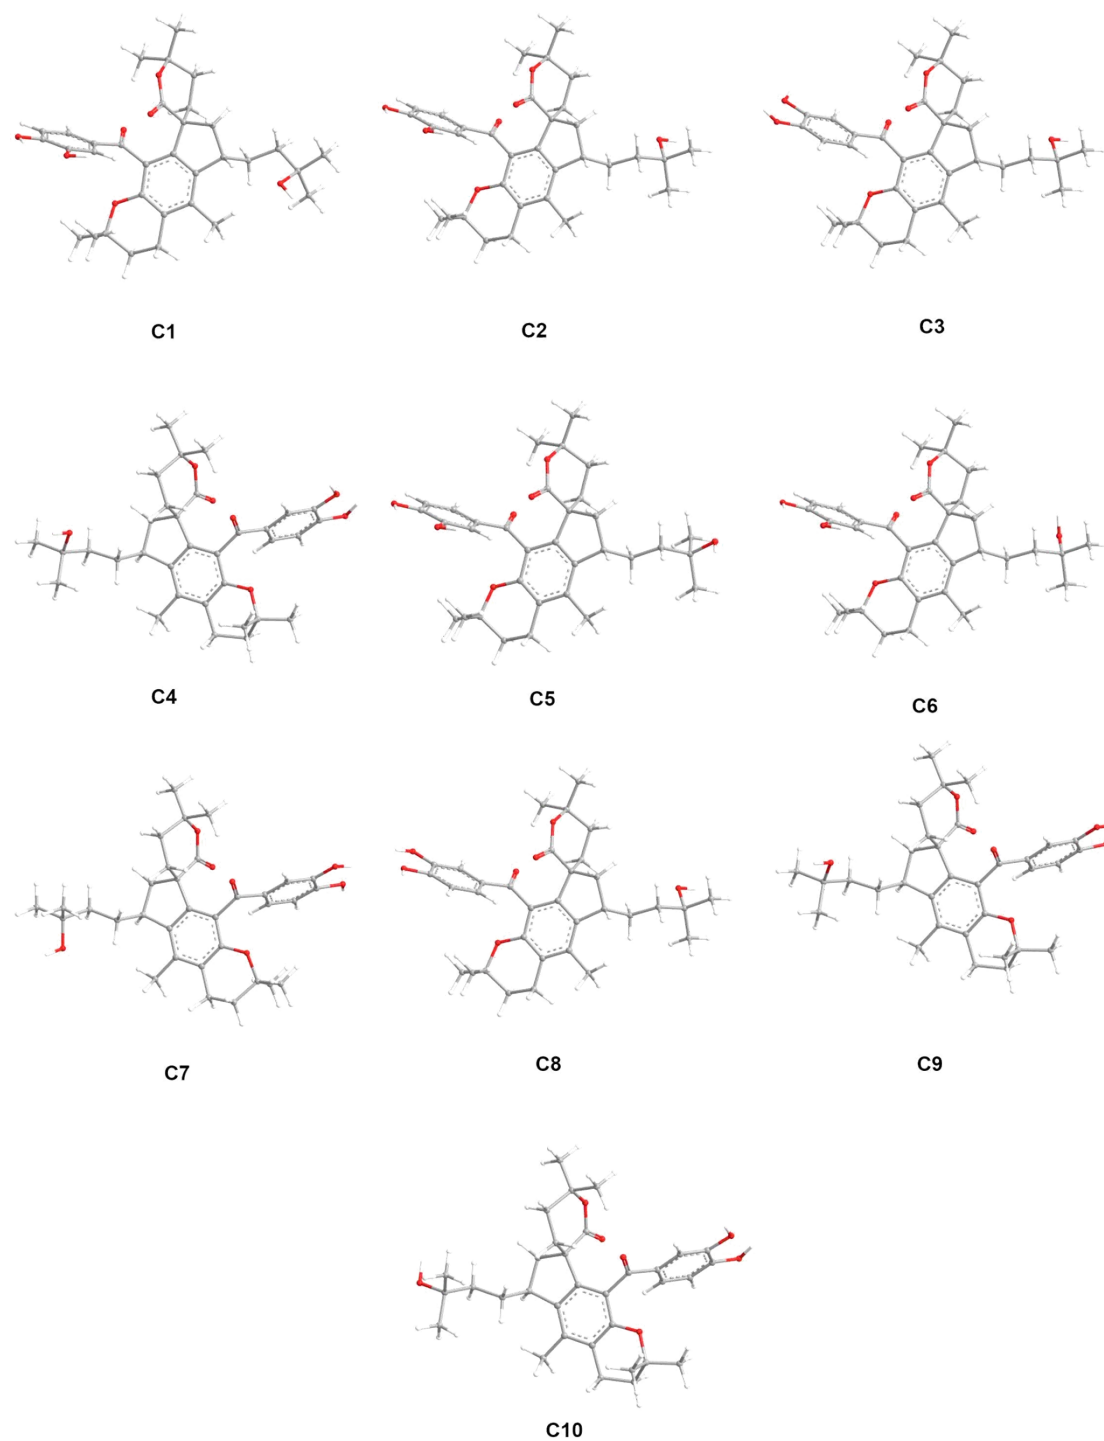

Figure S39. B3LYP/6-31G(d) optimized lowest energy conformers for (3*S*, 5*S*)-2.

Table S5. Energy (298.15 K) analysis for (3*S*, 5*S*)-2.

| Conf. | G (Hartree)  | $\Delta G$ (Kcal/mol) | Boltzmann Distribution |
|-------|--------------|-----------------------|------------------------|
| C1    | -1808.782395 | 1.39809228            | 0.027674862            |



|     |              |            |             |
|-----|--------------|------------|-------------|
| C2  | -1808.784623 | 0          | 0.29337097  |
| C3  | -1808.783907 | 0.44929716 | 0.137376355 |
| C4  | -1808.784    | 0.39093873 | 0.151604063 |
| C5  | -1808.783405 | 0.76430718 | 0.080703101 |
| C6  | -1808.784128 | 0.31061745 | 0.173626811 |
| C7  | -1808.782525 | 1.31651598 | 0.031762291 |
| C8  | -1808.782244 | 1.49284629 | 0.023582772 |
| C9  | -1808.782489 | 1.33910634 | 0.030573456 |
| C10 | -1808.782948 | 1.05107925 | 0.049725319 |

### ECD simulation

ECD spectrum of each conformation is simulated according to the overlapping Gaussian functions expressed as:

$$\Delta\varepsilon(E) = \frac{1}{2.296 \times 10^{-39} \sqrt{\pi} \sigma} \sum_i^A \Delta E_i R_i e^{[-(E - \Delta E_i)^2 / \sigma^2]}$$

Where  $\sigma$  is half the bandwidth at 1/e peak height and expressed in energy units. The parameters  $\Delta E_i$  and  $R_i$  are the excitation energies and rotational strengths for the transition  $i$ , respectively.

The above function is converted to  $\Delta\varepsilon$ ,  $\lambda$  (wavelength) correlations as:

$$\Delta\varepsilon(\lambda) = \frac{1}{2.296 \times 10^{-39} \sqrt{\pi} \sigma} \sum_i^A \Delta E_i R_i e^{[-(1240/\lambda - \Delta E_i)^2 / \sigma^2]}$$

and then simulation were

accomplished by using the Excel 2003 and the Origin 7.0 software.

To get the final spectra, all the simulated spectra of conformations of each compound were averaged according to their energy and the Boltzmann distribution theory expressed as:

$$\frac{N_i^*}{N} = \frac{g_i e^{-\varepsilon_i / k_B T}}{\sum g_i e^{-\varepsilon_i / k_B T}}$$

**Table S6. Calculated ECD Data for (3S, 5S)-2 in methanol.**

| State | C1                      |                     | C2                      |                     |
|-------|-------------------------|---------------------|-------------------------|---------------------|
|       | Excitation energies(eV) | Rotatory Strengths* | Excitation energies(eV) | Rotatory Strengths* |
| 1     | 3.7969                  | 34.6698             | 3.7975                  | 32.6194             |
| 2     | 4.2368                  | 5.9546              | 4.2602                  | 9.4797              |
| 3     | 4.5694                  | -36.3022            | 4.5672                  | -36.1223            |
| 4     | 4.8256                  | 15.4115             | 4.8417                  | 20.7841             |
| 5     | 4.931                   | -19.2027            | 4.9292                  | -26.2577            |
| 6     | 5.1205                  | -19.3757            | 5.1263                  | -19.3929            |

|    |        |          |        |          |
|----|--------|----------|--------|----------|
| 7  | 5.4528 | 5.741    | 5.4516 | 4.7105   |
| 8  | 5.7816 | 57.4481  | 5.7843 | 66.4423  |
| 9  | 5.8141 | -77.5999 | 5.814  | -90.3352 |
| 10 | 6.1317 | 53.6999  | 6.1463 | 61.7638  |
| 11 | 6.2223 | -6.4113  | 6.2209 | -14.8961 |
| 12 | 6.245  | 1.8595   | 6.2574 | -2.4996  |
| 13 | 6.3182 | -56.0615 | 6.3361 | -56.4547 |
| 14 | 6.455  | -8.8872  | 6.4592 | -7.4255  |
| 15 | 6.477  | -53.902  | 6.4777 | -45.1981 |
| 16 | 6.5022 | 8.7803   | 6.5165 | 15.9448  |
| 17 | 6.6052 | 29.6862  | 6.6074 | 2.5428   |
| 18 | 6.6118 | -0.6286  | 6.6115 | 17.9747  |
| 19 | 6.6359 | 5.5731   | 6.6501 | 4.8969   |
| 20 | 6.7365 | 4.5537   | 6.7526 | 2.332    |
| 21 | 6.8938 | 2.9713   | 6.8884 | 7.5489   |
| 22 | 6.904  | -6.8494  | 6.9242 | -19.5283 |
| 23 | 6.9597 | 62.3066  | 6.9658 | 117.2837 |
| 24 | 6.9792 | -21.4435 | 6.9817 | -68.9156 |
| 25 | 7.0276 | 1.7434   | 7.019  | -1.478   |
| 26 | 7.0501 | 4.6636   | 7.0681 | 1.2669   |
| 27 | 7.144  | -1.6597  | 7.1293 | 1.6268   |
| 28 | 7.2255 | 8.7167   | 7.2301 | 11.7992  |
| 29 | 7.2405 | -1.9204  | 7.2596 | -2.4337  |
| 30 | 7.2511 | -0.7103  | 7.2656 | -3.4282  |
| 31 | 7.329  | 8.3755   | 7.3346 | 8.4978   |
| 32 | 7.3506 | 6.1418   | 7.3514 | 9.4945   |
| 33 | 7.3876 | -41.3357 | 7.3779 | -28.1675 |
| 34 | 7.4072 | -6.356   | 7.4011 | -16.3305 |
| 35 | 7.4259 | -17.1763 | 7.4315 | 12.5532  |
| 36 | 7.4457 | 2.6465   | 7.457  | -21.1089 |
| 37 | 7.4542 | 14.3646  | 7.4663 | -7.2766  |
| 38 | 7.4904 | -24.2796 | 7.4947 | -6.5993  |
| 39 | 7.5095 | -1.8434  | 7.5137 | -6.3005  |
| 40 | 7.5218 | -15.8978 | 7.5214 | -6.9781  |
| 41 | 7.5612 | -20.6637 | 7.5764 | -28.0264 |
| 42 | 7.5818 | 9.6083   | 7.5989 | -4.1183  |
| 43 | 7.6123 | 12.2855  | 7.6336 | 41.4776  |
| 44 | 7.6194 | 36.1739  | 7.6357 | 2.2747   |
| 45 | 7.6291 | 9.4535   | 7.6685 | 62.7345  |
| 46 | 7.6858 | 2.0814   | 7.6935 | 5.2507   |
| 47 | 7.69   | -1.304   | 7.7032 | 8.6445   |
| 48 | 7.7377 | 32.5494  | 7.7485 | 13.6583  |
| 49 | 7.7516 | 9.8322   | 7.7632 | -8.9161  |
| 50 | 7.7551 | -29.6561 | 7.7678 | -10.6568 |
| 51 | 7.7916 | -4.7408  | 7.811  | 18.535   |
| 52 | 7.8192 | 30.6025  | 7.8268 | 5.1214   |
| 53 | 7.8232 | 11.8131  | 7.8442 | 1.0446   |
| 54 | 7.8787 | -18.7462 | 7.88   | -17.2354 |
| 55 | 7.9135 | -0.7659  | 7.9328 | -0.0707  |
| 56 | 7.9388 | -13.7862 | 7.9588 | -17.902  |
| 57 | 7.9839 | -6.1224  | 7.9664 | 6.5353   |
| 58 | 8.008  | -9.3502  | 8.0021 | -3.5418  |
| 59 | 8.0341 | 11.17    | 8.0498 | -31.8466 |
| 60 | 8.0514 | -32.3674 | 8.0642 | -3.7987  |

| State | C3                      |                     | C4                      |                     |
|-------|-------------------------|---------------------|-------------------------|---------------------|
|       | Excitation energies(eV) | Rotatory Strengths* | Excitation energies(eV) | Rotatory Strengths* |
| 1     | 3.817                   | 30.351              | 3.8119                  | 26.256              |
| 2     | 4.2209                  | 35.9547             | 4.1839                  | 53.5816             |
| 3     | 4.5258                  | -96.8221            | 4.513                   | -96.1712            |
| 4     | 4.8291                  | -2.6745             | 4.8057                  | 7.0912              |
| 5     | 4.9563                  | 27.8173             | 4.9392                  | 25.0237             |
| 6     | 5.1875                  | -16.9398            | 5.1719                  | -18.7709            |
| 7     | 5.4836                  | 5.8712              | 5.4852                  | 5.8569              |
| 8     | 5.8142                  | 50.7692             | 5.8232                  | 35.4695             |
| 9     | 5.8347                  | -6.0745             | 5.8544                  | 22.876              |
| 10    | 6.1812                  | -100.1582           | 6.1952                  | -59.647             |
| 11    | 6.2133                  | 82.229              | 6.2221                  | 81.7854             |
| 12    | 6.2674                  | -66.3713            | 6.2587                  | -98.876             |
| 13    | 6.3872                  | -39.2101            | 6.3788                  | -20.057             |
| 14    | 6.4015                  | 7.0454              | 6.3835                  | 14.8179             |
| 15    | 6.4872                  | 157.7165            | 6.4835                  | 127.392             |
| 16    | 6.512                   | 62.4326             | 6.5316                  | 16.2091             |
| 17    | 6.6144                  | 24.7869             | 6.6201                  | 85.9601             |
| 18    | 6.6216                  | -18.7913            | 6.6285                  | -21.8906            |
| 19    | 6.6687                  | -103.8906           | 6.6959                  | -111.7088           |
| 20    | 6.7428                  | -2.8685             | 6.7346                  | -1.8996             |
| 21    | 6.8909                  | -15.5527            | 6.8588                  | 2.9039              |
| 22    | 6.9069                  | 4.4298              | 6.9074                  | -15.9731            |
| 23    | 6.9943                  | -0.9854             | 7.0112                  | 4.4148              |
| 24    | 7.0286                  | -3.8821             | 7.023                   | -9.6727             |
| 25    | 7.0394                  | 8.1037              | 7.0622                  | 8.4387              |
| 26    | 7.0753                  | 21.4985             | 7.0721                  | 10.9973             |
| 27    | 7.0908                  | -27.6147            | 7.1006                  | -1.6444             |
| 28    | 7.204                   | -1.7592             | 7.1951                  | 7.374               |
| 29    | 7.2366                  | -5.0708             | 7.2431                  | 7.8029              |
| 30    | 7.3031                  | 2.4508              | 7.297                   | -1.4334             |
| 31    | 7.3217                  | -7.0625             | 7.3506                  | -1.0275             |
| 32    | 7.3634                  | 3.6031              | 7.3686                  | -5.7718             |
| 33    | 7.3871                  | 2.2555              | 7.4004                  | -8.9279             |
| 34    | 7.3927                  | -11.2127            | 7.4089                  | -12.2019            |
| 35    | 7.4232                  | -90.022             | 7.4248                  | -41.8177            |
| 36    | 7.4488                  | 0.382               | 7.4743                  | -1.5276             |
| 37    | 7.4803                  | 14.1471             | 7.4779                  | 5.842               |
| 38    | 7.496                   | -9.7509             | 7.4952                  | -6.7573             |
| 39    | 7.5237                  | 9.0654              | 7.5101                  | -11.7673            |
| 40    | 7.5739                  | 1.4991              | 7.5467                  | -1.3176             |
| 41    | 7.6117                  | 5.3304              | 7.6015                  | -3.7926             |
| 42    | 7.6242                  | 11.9684             | 7.6351                  | -1.2092             |
| 43    | 7.6498                  | 27.943              | 7.6581                  | -3.0176             |
| 44    | 7.6836                  | 4.636               | 7.6757                  | 11.1435             |
| 45    | 7.7                     | 6.2611              | 7.6972                  | 18.5592             |
| 46    | 7.7122                  | 16.8363             | 7.7202                  | 17.9332             |
| 47    | 7.7407                  | 27.0391             | 7.7412                  | -21.6908            |
| 48    | 7.7527                  | 14.5971             | 7.7462                  | 15.4034             |
| 49    | 7.768                   | -1.1029             | 7.77                    | -25.4116            |
| 50    | 7.8068                  | -2.5328             | 7.8203                  | 27.4998             |
| 51    | 7.8422                  | -20.5508            | 7.8441                  | -7.2544             |
| 52    | 7.8598                  | -11.6582            | 7.8622                  | -14.3494            |

|    |        |          |        |         |
|----|--------|----------|--------|---------|
| 53 | 7.8765 | -37.6821 | 7.87   | 10.1338 |
| 54 | 7.8886 | 32.8804  | 7.908  | 10.7819 |
| 55 | 7.9359 | 6.2044   | 7.9227 | -4.9946 |
| 56 | 7.9544 | -9.9647  | 7.9658 | -3.026  |
| 57 | 7.9785 | 5.986    | 7.9773 | 7.8884  |
| 58 | 7.9894 | -5.1976  | 8.0013 | 2.4083  |
| 59 | 8.0353 | -4.5062  | 8.0128 | 7.6712  |
| 60 | 8.044  | 13.2327  | 8.0407 | 5.8958  |

| State | C5                      |                     | C6                      |                     |
|-------|-------------------------|---------------------|-------------------------|---------------------|
|       | Excitation energies(eV) | Rotatory Strengths* | Excitation energies(eV) | Rotatory Strengths* |
| 1     | 3.7956                  | 32.2436             | 3.7975                  | 33.3294             |
| 2     | 4.2637                  | 10.9726             | 4.2567                  | 10.5599             |
| 3     | 4.5611                  | -35.5423            | 4.5649                  | -37.8976            |
| 4     | 4.845                   | 20.653              | 4.8428                  | 17.7335             |
| 5     | 4.9251                  | -26.5438            | 4.9285                  | -23.4947            |
| 6     | 5.1293                  | -19.5398            | 5.1333                  | -18.7757            |
| 7     | 5.4516                  | 4.7711              | 5.4536                  | 4.921               |
| 8     | 5.7823                  | 65.8468             | 5.7855                  | 72.8499             |
| 9     | 5.8116                  | -87.7891            | 5.8128                  | -95.1751            |
| 10    | 6.1498                  | 65.4293             | 6.1476                  | 62.902              |
| 11    | 6.218                   | -18.7344            | 6.2173                  | -17.4893            |
| 12    | 6.2594                  | -3.2142             | 6.2539                  | -0.0584             |
| 13    | 6.3425                  | -55.1036            | 6.3369                  | -55.3527            |
| 14    | 6.4604                  | -10.9691            | 6.4566                  | -8.0152             |
| 15    | 6.474                   | -45.0132            | 6.477                   | -51.116             |
| 16    | 6.5193                  | 17.4551             | 6.5125                  | 16.0141             |
| 17    | 6.6059                  | 4.5831              | 6.609                   | 18.4402             |
| 18    | 6.6116                  | 14.7104             | 6.6106                  | 4.2759              |
| 19    | 6.657                   | 4.9427              | 6.6468                  | 4.9282              |
| 20    | 6.7538                  | 1.9286              | 6.7471                  | 3.5318              |
| 21    | 6.8802                  | 8.8689              | 6.8836                  | 8.4192              |
| 22    | 6.9191                  | -16.8033            | 6.9202                  | -17.673             |
| 23    | 6.9602                  | 91.9445             | 6.9624                  | 105.2711            |
| 24    | 6.9881                  | -50.5384            | 6.985                   | -58.6012            |
| 25    | 7.0167                  | -3.4186             | 7.0257                  | -4.01               |
| 26    | 7.0531                  | 3.9772              | 7.0528                  | 4.3176              |
| 27    | 7.1162                  | 4.1962              | 7.1241                  | 2.099               |
| 28    | 7.2296                  | 12.9711             | 7.2251                  | 5.7403              |
| 29    | 7.2665                  | -7.0127             | 7.2416                  | 8.0226              |
| 30    | 7.2782                  | 0.5694              | 7.2544                  | -0.6465             |
| 31    | 7.3354                  | 7.1748              | 7.2916                  | -13.1819            |
| 32    | 7.344                   | 11.0223             | 7.3329                  | 8.4485              |
| 33    | 7.3617                  | -16.7225            | 7.3494                  | 4.2395              |
| 34    | 7.3962                  | -21.1076            | 7.4005                  | -24.4564            |
| 35    | 7.43                    | 15.6021             | 7.4306                  | 13.3704             |
| 36    | 7.4581                  | -40.6985            | 7.4535                  | -62.5572            |
| 37    | 7.4723                  | -1.273              | 7.4615                  | 19.0905             |
| 38    | 7.5002                  | -3.5037             | 7.4756                  | 17.1503             |
| 39    | 7.5122                  | -11.9535            | 7.494                   | -13.049             |
| 40    | 7.5507                  | 3.8162              | 7.5063                  | 3.1497              |
| 41    | 7.5668                  | -31.8192            | 7.518                   | -33.5559            |
| 42    | 7.5844                  | -6.618              | 7.5608                  | -1.5159             |
| 43    | 7.6263                  | 11.692              | 7.5845                  | -16.8358            |
| 44    | 7.6319                  | 8.9567              | 7.6198                  | 11.0733             |

|    |        |          |        |          |
|----|--------|----------|--------|----------|
| 45 | 7.6673 | 94.5769  | 7.6271 | 11.9953  |
| 46 | 7.6941 | 8.2075   | 7.6684 | 87.6494  |
| 47 | 7.7153 | 7.4666   | 7.6882 | 8.3771   |
| 48 | 7.7458 | 16.1223  | 7.7462 | 13.4008  |
| 49 | 7.7649 | -22.484  | 7.7606 | -15.6191 |
| 50 | 7.8044 | 35.4497  | 7.7631 | 5.3974   |
| 51 | 7.8069 | -1.5531  | 7.8107 | 25.9193  |
| 52 | 7.8325 | -40.2005 | 7.8299 | -13.3642 |
| 53 | 7.8474 | 1.8944   | 7.8482 | 6.9399   |
| 54 | 7.8677 | 27.3646  | 7.8743 | 17.098   |
| 55 | 7.8868 | -11.282  | 7.8945 | -15.1498 |
| 56 | 7.9494 | -11.4789 | 7.9559 | -16.9166 |
| 57 | 8.0051 | -4.6173  | 7.9872 | 2.3752   |
| 58 | 8.0274 | -73.2184 | 8.0206 | -4.6203  |
| 59 | 8.0609 | -15.0789 | 8.0262 | -60.7422 |
| 60 | 8.0665 | 1.1216   | 8.0503 | -0.8135  |

| State | C7                      |                     | C8                      |                     |
|-------|-------------------------|---------------------|-------------------------|---------------------|
|       | Excitation energies(eV) | Rotatory Strengths* | Excitation energies(eV) | Rotatory Strengths* |
| 1     | 3.8096                  | 30.1524             | 3.8115                  | 29.6878             |
| 2     | 4.2391                  | 28.4647             | 4.245                   | 28.9051             |
| 3     | 4.5164                  | -73.3402            | 4.5186                  | -72.9043            |
| 4     | 4.8352                  | -19.9661            | 4.8385                  | -20.2388            |
| 5     | 5.0015                  | 28.4077             | 5.0038                  | 28.0009             |
| 6     | 5.1895                  | -21.4439            | 5.1886                  | -21.2783            |
| 7     | 5.4765                  | 5.4299              | 5.4775                  | 5.094               |
| 8     | 5.8096                  | 77.0888             | 5.8107                  | 73.8334             |
| 9     | 5.8162                  | -48.0363            | 5.8167                  | -44.5764            |
| 10    | 6.1664                  | -91.4608            | 6.1681                  | -93.1768            |
| 11    | 6.1947                  | 52.1733             | 6.1965                  | 51.6611             |
| 12    | 6.2602                  | -63.5756            | 6.2644                  | -66.1814            |
| 13    | 6.3767                  | -18.1868            | 6.3791                  | -16.2407            |
| 14    | 6.4385                  | 16.9516             | 6.4367                  | 15.559              |
| 15    | 6.4864                  | 206.8489            | 6.487                   | 204.7677            |
| 16    | 6.5117                  | 89.0225             | 6.5113                  | 96.2522             |
| 17    | 6.5943                  | -20.022             | 6.5936                  | -20.6354            |
| 18    | 6.629                   | -73.4372            | 6.6226                  | -42.3361            |
| 19    | 6.6536                  | -59.6096            | 6.6505                  | -89.3929            |
| 20    | 6.7354                  | -14.229             | 6.7414                  | -14.1794            |
| 21    | 6.8877                  | -25.138             | 6.8924                  | -23.0461            |
| 22    | 6.9114                  | 0.9064              | 6.9149                  | -0.5993             |
| 23    | 6.9624                  | -14.9818            | 6.9656                  | -15.5751            |
| 24    | 7.0398                  | -0.6614             | 7.0419                  | -2.2267             |
| 25    | 7.0544                  | 16.7831             | 7.0551                  | 19.2162             |
| 26    | 7.0732                  | 3.4505              | 7.0749                  | 3.5296              |
| 27    | 7.0926                  | -12.6804            | 7.0947                  | -13.611             |
| 28    | 7.2113                  | -0.2518             | 7.2193                  | -1.1524             |
| 29    | 7.2553                  | -5.1118             | 7.2433                  | -4.7385             |
| 30    | 7.3112                  | -5.9204             | 7.3087                  | -6.2832             |
| 31    | 7.3435                  | 3.6528              | 7.3427                  | 2.7798              |
| 32    | 7.3572                  | -0.3604             | 7.3569                  | 4.1351              |
| 33    | 7.3792                  | -20.6887            | 7.3812                  | -19.9248            |
| 34    | 7.3916                  | -11.7289            | 7.391                   | -8.8879             |
| 35    | 7.4161                  | -33.5577            | 7.418                   | -44.329             |
| 36    | 7.4652                  | -40.4186            | 7.4684                  | -27.8619            |

|    |        |          |        |          |
|----|--------|----------|--------|----------|
| 37 | 7.477  | 9.497    | 7.4787 | 8.2598   |
| 38 | 7.5008 | 13.8848  | 7.5139 | -6.3089  |
| 39 | 7.5399 | 0.7408   | 7.5233 | 17.5299  |
| 40 | 7.5721 | 18.3664  | 7.5748 | 7.9177   |
| 41 | 7.5898 | -4.5093  | 7.6078 | 9.7662   |
| 42 | 7.6074 | 17.1525  | 7.6157 | 17.5208  |
| 43 | 7.6459 | 11.5468  | 7.6368 | 25.5507  |
| 44 | 7.6791 | 18.3083  | 7.6901 | 4.3994   |
| 45 | 7.6999 | 23.7717  | 7.6998 | -14.4541 |
| 46 | 7.7034 | -27.67   | 7.7032 | 44.2469  |
| 47 | 7.723  | 38.7022  | 7.7117 | 16.008   |
| 48 | 7.7512 | -1.5511  | 7.7535 | 1.2895   |
| 49 | 7.7619 | 8.4448   | 7.765  | 10.3919  |
| 50 | 7.7954 | -7.2923  | 7.8105 | -3.3844  |
| 51 | 7.8103 | 7.0559   | 7.8416 | 15.0568  |
| 52 | 7.8415 | 19.827   | 7.8548 | -44.0877 |
| 53 | 7.861  | -34.3197 | 7.8619 | -40.622  |
| 54 | 7.8663 | -14.4394 | 7.8728 | 20.3928  |
| 55 | 7.9209 | -5.0488  | 7.9371 | 10.5208  |
| 56 | 7.9368 | 7.9253   | 7.9592 | 3.9266   |
| 57 | 7.9886 | -4.0559  | 7.9917 | -2.7368  |
| 58 | 8.0039 | -8.3878  | 8.0016 | -8.822   |
| 59 | 8.0326 | -16.4566 | 8.0294 | -0.9957  |
| 60 | 8.0347 | 12.2031  | 8.0401 | -12.9143 |

| State | C9                      |                     | C10                     |                     |
|-------|-------------------------|---------------------|-------------------------|---------------------|
|       | Excitation energies(eV) | Rotatory Strengths* | Excitation energies(eV) | Rotatory Strengths* |
| 1     | 3.8034                  | 24.4188             | 3.8094                  | 26.1905             |
| 2     | 4.2143                  | 46.2295             | 4.1838                  | 55.8962             |
| 3     | 4.506                   | -72.9165            | 4.5081                  | -97.4897            |
| 4     | 4.8124                  | -9.1146             | 4.8073                  | 5.9757              |
| 5     | 4.9843                  | 28.3535             | 4.9342                  | 25.5245             |
| 6     | 5.1662                  | -25.8272            | 5.1754                  | -18.842             |
| 7     | 5.4735                  | 4.9614              | 5.4832                  | 6.0395              |
| 8     | 5.8211                  | 22.679              | 5.82                    | 37.3467             |
| 9     | 5.8384                  | 18.6468             | 5.8509                  | 19.0157             |
| 10    | 6.1847                  | -66.1264            | 6.1878                  | -48.7505            |
| 11    | 6.2081                  | 59.6314             | 6.2218                  | 66.1731             |
| 12    | 6.2544                  | -92.3136            | 6.2576                  | -89.9928            |
| 13    | 6.373                   | -19.4988            | 6.3863                  | -17.0001            |
| 14    | 6.424                   | 29.941              | 6.3901                  | 12.7078             |
| 15    | 6.4824                  | 214.3725            | 6.4818                  | 126.8546            |
| 16    | 6.5399                  | 20.2896             | 6.5326                  | 16.3259             |
| 17    | 6.6148                  | -10.4008            | 6.6225                  | 70.1741             |
| 18    | 6.626                   | 52.4632             | 6.6281                  | -17.5001            |
| 19    | 6.6667                  | -130.707            | 6.6943                  | -107.0565           |
| 20    | 6.7294                  | -14.6105            | 6.7315                  | -0.5244             |
| 21    | 6.868                   | 7.9523              | 6.8584                  | 1.5663              |
| 22    | 6.9098                  | -24.7017            | 6.8955                  | -15.2825            |
| 23    | 6.9924                  | -28.5895            | 7.0097                  | 7.5024              |
| 24    | 7.0297                  | -0.9378             | 7.0146                  | -9.3714             |
| 25    | 7.0586                  | 12.6392             | 7.0558                  | 3.9872              |
| 26    | 7.0868                  | 7.3833              | 7.0811                  | 11.1471             |
| 27    | 7.119                   | 0.6031              | 7.0931                  | -3.0405             |
| 28    | 7.2149                  | 8.8794              | 7.161                   | 5.8581              |

|    |        |          |        |          |
|----|--------|----------|--------|----------|
| 29 | 7.2548 | 6.2511   | 7.2457 | 9.122    |
| 30 | 7.3441 | 5.5921   | 7.2911 | -0.6432  |
| 31 | 7.3559 | -12.3705 | 7.3321 | 6.9792   |
| 32 | 7.3576 | -5.7837  | 7.369  | -4.3484  |
| 33 | 7.3937 | -0.9958  | 7.3999 | -7.0829  |
| 34 | 7.4038 | -3.8037  | 7.4084 | -27.0768 |
| 35 | 7.4514 | -61.6639 | 7.417  | -24.326  |
| 36 | 7.4772 | 6.7424   | 7.4692 | 27.6035  |
| 37 | 7.4898 | -4.0383  | 7.4794 | -36.014  |
| 38 | 7.4957 | -10.3212 | 7.5017 | 1.1554   |
| 39 | 7.5101 | 4.2991   | 7.512  | -22.6176 |
| 40 | 7.5528 | 5.5002   | 7.5562 | 2.6512   |
| 41 | 7.6014 | -7.0845  | 7.5826 | -4.6655  |
| 42 | 7.6254 | 16.7451  | 7.6393 | 1.1411   |
| 43 | 7.6486 | 6.9263   | 7.664  | 11.0146  |
| 44 | 7.6661 | -0.8351  | 7.6658 | -3.4928  |
| 45 | 7.6978 | 19.767   | 7.7104 | -4.2716  |
| 46 | 7.7152 | 45.3321  | 7.7411 | 2.3621   |
| 47 | 7.7358 | -25.1559 | 7.7545 | 2.4621   |
| 48 | 7.7483 | 7.2947   | 7.7788 | -8.0951  |
| 49 | 7.7574 | -38.8978 | 7.7861 | 12.6118  |
| 50 | 7.8147 | -9.3049  | 7.7995 | -27.8525 |
| 51 | 7.8271 | 22.7183  | 7.8331 | 24.6466  |
| 52 | 7.8568 | -7.8776  | 7.851  | -28.9077 |
| 53 | 7.8772 | 0.7322   | 7.8716 | 50.6259  |
| 54 | 7.8905 | -6.056   | 7.8961 | 15.8172  |
| 55 | 7.9621 | 5.3176   | 7.916  | -20.085  |
| 56 | 7.9689 | -8.5715  | 7.9702 | 16.0797  |
| 57 | 7.9857 | 17.987   | 7.9978 | 3.3208   |
| 58 | 7.9995 | -3.3669  | 8.0033 | -2.7558  |
| 59 | 8.0042 | 8.7896   | 8.0178 | 7.7222   |
| 60 | 8.0437 | 1.3643   | 8.0642 | -6.0996  |

\* R(velocity) 10\*\*<sup>-40</sup> erg-esu-cm

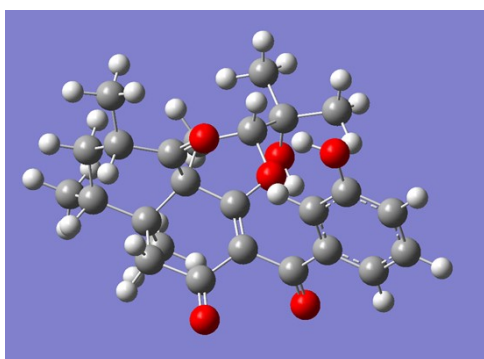

(1*R*,3*S*,5*R*,6*S*,17*R*)-Conf 3a1 (22.91%)

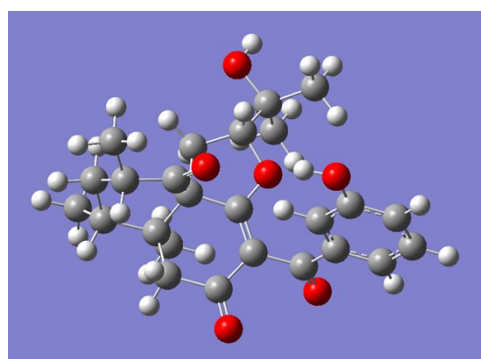

(1*R*,3*S*,5*R*,6*S*,17*R*)-Conf 3a2 (2.25%)

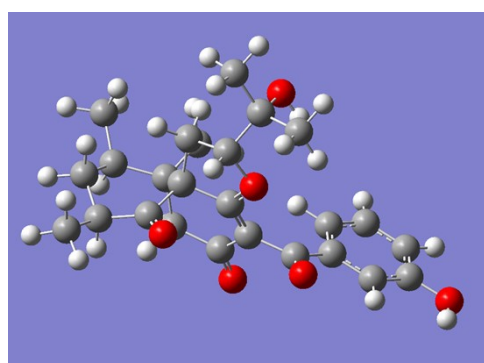

(1*R*,3*S*,5*R*,6*S*,17*R*)-Conf 3a3 (37.62%)

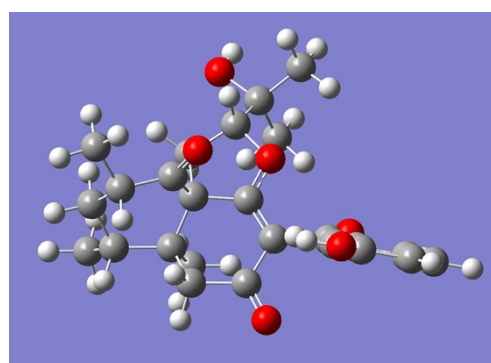

(1*R*,3*S*,5*R*,6*S*,17*R*)-Conf 3a4 (10.37%)

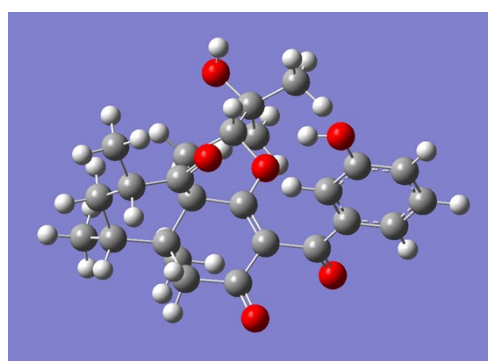

(1*R*,3*S*,5*R*,6*S*,17*R*)-Conf 3a5 (3.57%)

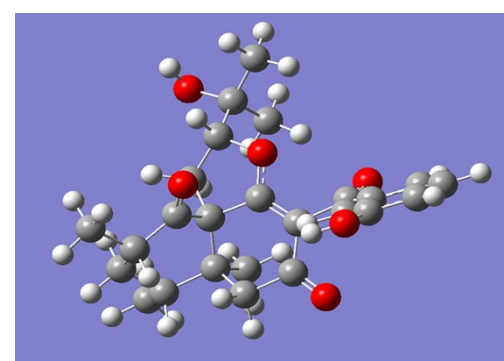

(1*R*,3*S*,5*R*,6*S*,17*R*)-Conf 3a6 (15.92%)

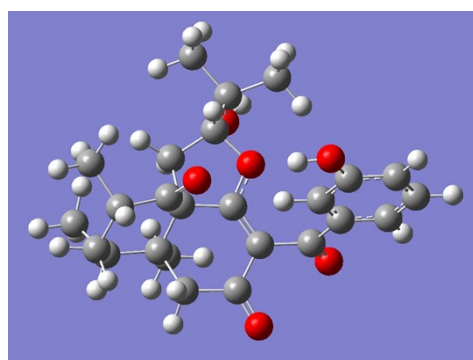

(1*R*,3*S*,5*R*,6*S*,17*R*)-Conf 3a7 (1.61%)

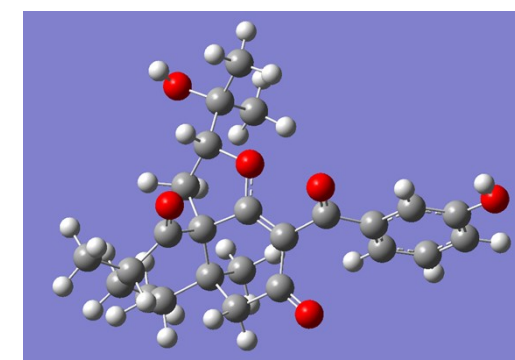

(1*R*,3*S*,5*R*,6*S*,17*R*)-Conf 3a8 (4.34%)

Fig. S40. DFT-optimized structures for low-energy conformers and Boltzmann distributions of compound (1*R*,3*S*,5*R*,6*S*,17*R*)-3a [(1*R*,3*S*,5*R*,6*S*,17*R*)-3a1-(1*R*,3*S*,5*R*,6*S*,17*R*)-3a8].

Table S7. The Cartesian coordinates for the lowest-energy conformer of (1*R*,3*S*,5*R*,6*S*,17*R*)-3a1 in the ECD calculations.

| Number | Atom | X           | Y           | Z           |
|--------|------|-------------|-------------|-------------|
| 1      | C    | -3.88296500 | -1.02164500 | 1.23713100  |
| 2      | C    | -2.63674600 | -1.34874800 | 2.06552400  |
| 3      | C    | -1.40831800 | -0.63254600 | 1.50987400  |
| 4      | C    | -1.47715000 | -0.10514900 | 0.04803300  |
| 5      | C    | -2.33110800 | -1.04098100 | -0.87519300 |
| 6      | C    | -3.76776400 | -1.33256600 | -0.27262500 |
| 7      | C    | -0.05666600 | -0.00524300 | -0.47101500 |
| 8      | C    | 0.63761100  | -0.99987400 | -1.06578200 |
| 9      | C    | -0.05258300 | -2.27205400 | -1.34117000 |



|    |   |             |             |             |
|----|---|-------------|-------------|-------------|
| 10 | C | -1.53791500 | -2.37639400 | -0.95788000 |
| 11 | C | 2.04171600  | -0.80734400 | -1.59367500 |
| 12 | C | 3.16694200  | -0.67505900 | -0.61907600 |
| 13 | O | 0.51667400  | -3.23800000 | -1.82717000 |
| 14 | C | -2.42545200 | -0.47895200 | -2.31173800 |
| 15 | O | -0.41685500 | -0.44225900 | 2.19400400  |
| 16 | C | -2.81583100 | -1.07104300 | 3.56470800  |
| 17 | C | -4.94775000 | -0.64642600 | -0.98478000 |
| 18 | C | -1.85980800 | 1.40392800  | 0.13403800  |
| 19 | C | -0.51364100 | 2.10366000  | 0.36173000  |
| 20 | O | 0.45818800  | 1.22464300  | -0.27765900 |
| 21 | C | -0.36349700 | 3.50064600  | -0.27896600 |
| 22 | C | 1.05331900  | 4.04595100  | -0.04224700 |
| 23 | C | -1.41674500 | 4.45661500  | 0.28603900  |
| 24 | O | -0.62988700 | 3.40530000  | -1.68065200 |
| 25 | O | 2.22803800  | -0.77548400 | -2.79999200 |
| 26 | C | 4.47048200  | -0.52662500 | -1.11495000 |
| 27 | C | 5.53506800  | -0.40259900 | -0.22560100 |
| 28 | C | 5.31972100  | -0.41897900 | 1.15322400  |
| 29 | C | 4.01880600  | -0.56393800 | 1.64706000  |
| 30 | C | 2.94549300  | -0.69769800 | 0.76474700  |
| 31 | O | 3.85009400  | -0.56834100 | 3.00469800  |
| 32 | H | -4.74020400 | -1.57046200 | 1.64579500  |
| 33 | H | -4.12498100 | 0.04208800  | 1.37321200  |
| 34 | H | -2.41501200 | -2.42234200 | 1.95022800  |
| 35 | H | -3.92182900 | -2.41418100 | -0.39069300 |
| 36 | H | -2.00097000 | -3.04742600 | -1.68911100 |
| 37 | H | -1.57491700 | -2.91325900 | -0.00001400 |
| 38 | H | -2.93599600 | -1.20005900 | -2.95836000 |
| 39 | H | -2.98027500 | 0.46067700  | -2.36825300 |
| 40 | H | -1.43361200 | -0.30935300 | -2.73915900 |
| 41 | H | -3.61790300 | -1.69438700 | 3.97340400  |
| 42 | H | -3.08109200 | -0.02158200 | 3.73978700  |
| 43 | H | -1.89350900 | -1.28082100 | 4.11096200  |
| 44 | H | -5.88444600 | -0.92937300 | -0.49001700 |
| 45 | H | -5.03357600 | -0.93599500 | -2.03521700 |
| 46 | H | -4.87447500 | 0.44666900  | -0.93933700 |
| 47 | H | -2.57222400 | 1.62792600  | 0.93181400  |
| 48 | H | -2.28082100 | 1.74224700  | -0.81575700 |
| 49 | H | -0.25446800 | 2.14434200  | 1.42521100  |
| 50 | H | 1.80908500  | 3.36405700  | -0.44511500 |
| 51 | H | 1.25704400  | 4.17794900  | 1.02662200  |
| 52 | H | 1.15734200  | 5.01591700  | -0.53812000 |
| 53 | H | -2.42855200 | 4.11522000  | 0.04661800  |
| 54 | H | -1.32275800 | 4.54964600  | 1.37351100  |
| 55 | H | -1.28389300 | 5.44758900  | -0.15809200 |
| 56 | H | 0.05799200  | 2.83261300  | -2.06032500 |
| 57 | H | 4.62155900  | -0.51520800 | -2.18864200 |
| 58 | H | 6.54757500  | -0.29153600 | -0.60433800 |
| 59 | H | 6.14123000  | -0.32103000 | 1.85621000  |
| 60 | H | 1.93895700  | -0.80789200 | 1.15838500  |
| 61 | H | 2.90340600  | -0.66052400 | 3.19850300  |

**Table S8. The Cartesian coordinates for the lowest-energy conformer of (1*R*,3*S*,5*R*,6*S*,17*R*)-**3a2** in the ECD calculations.**

| Number | Atom | X           | Y           | Z          |
|--------|------|-------------|-------------|------------|
| 1      | C    | -3.90572400 | -0.86720600 | 1.28140500 |
| 2      | C    | -2.66821800 | -1.16799200 | 2.13210900 |

|    |   |             |             |             |
|----|---|-------------|-------------|-------------|
| 3  | C | -1.41911800 | -0.53071700 | 1.52813100  |
| 4  | C | -1.48097200 | -0.09012200 | 0.03765400  |
| 5  | C | -2.35663000 | -1.06453800 | -0.82333700 |
| 6  | C | -3.79793400 | -1.28723300 | -0.20209900 |
| 7  | C | -0.05852600 | -0.05144100 | -0.48956200 |
| 8  | C | 0.61398200  | -1.09771000 | -1.01941800 |
| 9  | C | -0.10420100 | -2.36952900 | -1.21130600 |
| 10 | C | -1.59086100 | -2.41783900 | -0.82028400 |
| 11 | C | 2.02227700  | -0.97368700 | -1.55520200 |
| 12 | C | 3.14587700  | -0.76594800 | -0.59049500 |
| 13 | O | 0.44130400  | -3.37846000 | -1.63327900 |
| 14 | C | -2.44159800 | -0.59393000 | -2.29295900 |
| 15 | O | -0.41637900 | -0.33824100 | 2.19476400  |
| 16 | C | -2.83765600 | -0.77603500 | 3.60693800  |
| 17 | C | -4.96691800 | -0.63379400 | -0.96164800 |
| 18 | C | -1.83594800 | 1.42931200  | 0.03477700  |
| 19 | C | -0.46846200 | 2.09994900  | 0.21800200  |
| 20 | O | 0.47982600  | 1.17722000  | -0.37708400 |
| 21 | C | -0.27466500 | 3.49326000  | -0.41341200 |
| 22 | C | -0.41332100 | 3.48605500  | -1.94117300 |
| 23 | C | 1.08864500  | 4.06206300  | 0.00342300  |
| 24 | O | -1.33765000 | 4.25146400  | 0.18692400  |
| 25 | O | 2.21651000  | -1.06055000 | -2.75741600 |
| 26 | C | 4.45067400  | -0.65835100 | -1.09346100 |
| 27 | C | 5.51394900  | -0.46845200 | -0.21419000 |
| 28 | C | 5.29640200  | -0.37977000 | 1.16160500  |
| 29 | C | 3.99439600  | -0.48525400 | 1.66228800  |
| 30 | C | 2.92241900  | -0.68358400 | 0.79053400  |
| 31 | O | 3.82253000  | -0.38746900 | 3.01617700  |
| 32 | H | -4.77651000 | -1.36450300 | 1.72593800  |
| 33 | H | -4.12042100 | 0.20908700  | 1.34184900  |
| 34 | H | -2.47700400 | -2.25305700 | 2.09592300  |
| 35 | H | -3.97098400 | -2.37169300 | -0.24252600 |
| 36 | H | -2.06919900 | -3.12623400 | -1.50497800 |
| 37 | H | -1.63671600 | -2.88896500 | 0.17130500  |
| 38 | H | -2.98329400 | 0.34827900  | -2.40936400 |
| 39 | H | -1.44710000 | -0.46785600 | -2.72920100 |
| 40 | H | -2.96443800 | -1.34580800 | -2.89299500 |
| 41 | H | -1.92109900 | -0.97234400 | 4.16773300  |
| 42 | H | -3.65706000 | -1.34435700 | 4.05927100  |
| 43 | H | -3.07193900 | 0.29067700  | 3.70414500  |
| 44 | H | -5.90795500 | -0.86816800 | -0.45006300 |
| 45 | H | -5.05677500 | -0.99349300 | -1.98995800 |
| 46 | H | -4.87775500 | 0.45871900  | -0.99029700 |
| 47 | H | -2.52551300 | 1.72852600  | 0.82624600  |
| 48 | H | -2.28693800 | 1.70843000  | -0.91944600 |
| 49 | H | -0.22441500 | 2.17041200  | 1.28309300  |
| 50 | H | -0.26199200 | 4.50040000  | -2.33004500 |
| 51 | H | -1.41005200 | 3.15905400  | -2.25191600 |
| 52 | H | 0.33244000  | 2.83393200  | -2.40517100 |
| 53 | H | 1.90746500  | 3.43420700  | -0.36115400 |
| 54 | H | 1.22478600  | 5.06927900  | -0.41042000 |
| 55 | H | 1.15651900  | 4.12705700  | 1.09441700  |
| 56 | H | -1.22850500 | 5.17500900  | -0.08999600 |
| 57 | H | 4.60353100  | -0.72932300 | -2.16462000 |
| 58 | H | 6.52731400  | -0.38794700 | -0.59848900 |
| 59 | H | 6.11687000  | -0.23003800 | 1.85668200  |
| 60 | H | 1.91544200  | -0.76384100 | 1.19000400  |
| 61 | H | 2.87495300  | -0.46216600 | 3.21342700  |

**Table S9. The Cartesian coordinates for the lowest-energy conformer of (1*R*,3*S*,5*R*,6*S*,17*R*)-3a3 in the ECD calculations.**

| Number | Atom | X           | Y           | Z           |
|--------|------|-------------|-------------|-------------|
| 1      | C    | 4.16205100  | -1.65902500 | 0.07659100  |
| 2      | C    | 3.59962400  | -1.53094100 | -1.34381300 |
| 3      | C    | 2.48804900  | -0.48416800 | -1.36932400 |
| 4      | C    | 1.70608600  | -0.21414400 | -0.04357100 |
| 5      | C    | 1.68554600  | -1.45482300 | 0.91141400  |
| 6      | C    | 3.13119700  | -2.05347100 | 1.15903800  |
| 7      | C    | 0.29271400  | 0.19818000  | -0.42307400 |
| 8      | C    | -0.76676800 | -0.64158100 | -0.56769700 |
| 9      | C    | -0.56282800 | -2.07221500 | -0.30763400 |
| 10     | C    | 0.81539000  | -2.52595300 | 0.19489500  |
| 11     | C    | -2.09543000 | -0.12852100 | -1.06571800 |
| 12     | C    | -3.34151000 | -0.37615800 | -0.27167100 |
| 13     | O    | -1.43805100 | -2.90832700 | -0.49800300 |
| 14     | C    | 0.98835400  | -1.12322200 | 2.25034700  |
| 15     | O    | 2.25172200  | 0.17870400  | -2.36068600 |
| 16     | C    | 4.67452500  | -1.22542000 | -2.39409000 |
| 17     | C    | 3.75687700  | -1.75627800 | 2.53412500  |
| 18     | C    | 2.25333300  | 1.13506200  | 0.51430500  |
| 19     | C    | 1.45300200  | 2.19048700  | -0.25788600 |
| 20     | O    | 0.18835100  | 1.52541800  | -0.55767000 |
| 21     | C    | 1.11815700  | 3.48524300  | 0.51258700  |
| 22     | C    | 0.25475400  | 4.41244100  | -0.35648600 |
| 23     | C    | 2.40580600  | 4.18799600  | 0.94845400  |
| 24     | O    | 0.42432000  | 3.15053300  | 1.71919100  |
| 25     | O    | -2.14054300 | 0.52067000  | -2.10161800 |
| 26     | C    | -3.33069800 | -0.87017900 | 1.03817800  |
| 27     | C    | -4.53220600 | -1.01082700 | 1.73446600  |
| 28     | C    | -5.74447000 | -0.67217000 | 1.13944400  |
| 29     | C    | -5.75616600 | -0.17940600 | -0.17241900 |
| 30     | C    | -4.56056100 | -0.02508800 | -0.86942100 |
| 31     | O    | -6.97223900 | 0.13862900  | -0.71195400 |
| 32     | H    | 4.97617400  | -2.39404800 | 0.07904200  |
| 33     | H    | 4.63004700  | -0.70204100 | 0.35039000  |
| 34     | H    | 3.12437200  | -2.48554900 | -1.61877500 |
| 35     | H    | 3.00744600  | -3.14403300 | 1.10491100  |
| 36     | H    | 0.63806200  | -3.37711200 | 0.86128900  |
| 37     | H    | 1.33908300  | -2.94052700 | -0.67573700 |
| 38     | H    | 0.88010700  | -2.03390700 | 2.84905000  |
| 39     | H    | 1.54108200  | -0.39955100 | 2.85351600  |
| 40     | H    | -0.01439300 | -0.71927100 | 2.08664900  |
| 41     | H    | 5.20956900  | -0.30035600 | -2.14933500 |
| 42     | H    | 4.22763400  | -1.09986000 | -3.38274800 |
| 43     | H    | 5.40566800  | -2.03968600 | -2.43651500 |
| 44     | H    | 3.16533200  | -2.15302600 | 3.36341000  |
| 45     | H    | 3.89373000  | -0.68072600 | 2.69853600  |
| 46     | H    | 4.74864100  | -2.22068100 | 2.58887900  |
| 47     | H    | 3.33012900  | 1.25592800  | 0.37187000  |
| 48     | H    | 2.02794200  | 1.22646500  | 1.57950500  |
| 49     | H    | 1.91743900  | 2.42744500  | -1.21932400 |
| 50     | H    | -0.66334200 | 3.90853900  | -0.67572800 |
| 51     | H    | 0.79225900  | 4.72777000  | -1.25797500 |
| 52     | H    | -0.01457600 | 5.30414700  | 0.21811500  |
| 53     | H    | 2.98308900  | 3.56266400  | 1.63648200  |
| 54     | H    | 3.03239900  | 4.43409800  | 0.08433500  |
| 55     | H    | 2.15515300  | 5.11683700  | 1.46952100  |
| 56     | H    | -0.42130800 | 2.75250400  | 1.45249300  |

|    |   |             |             |             |
|----|---|-------------|-------------|-------------|
| 57 | H | -2.39679800 | -1.15009100 | 1.51140000  |
| 58 | H | -4.52554600 | -1.39283400 | 2.75163900  |
| 59 | H | -6.68640000 | -0.78306500 | 1.66757600  |
| 60 | H | -4.54295200 | 0.37029600  | -1.88196000 |
| 61 | H | -6.83748700 | 0.44972800  | -1.62083900 |

**Table S10. The Cartesian coordinates for the lowest-energy conformer of (1*R*,3*S*,5*R*,6*S*,17*R*)-**3a4** in the ECD calculations.**

| Number | Atom | X           | Y           | Z           |
|--------|------|-------------|-------------|-------------|
| 1      | C    | -3.47764700 | -2.36237700 | 0.47558300  |
| 2      | C    | -2.33809400 | -2.39072300 | 1.49813400  |
| 3      | C    | -1.45176400 | -1.15380400 | 1.35711400  |
| 4      | C    | -1.51558000 | -0.36781500 | 0.01413400  |
| 5      | C    | -1.77215600 | -1.30930600 | -1.21210400 |
| 6      | C    | -3.02585400 | -2.25634700 | -0.99782900 |
| 7      | C    | -0.20142700 | 0.37354500  | -0.15281600 |
| 8      | C    | 0.90965100  | -0.11105300 | -0.76252400 |
| 9      | C    | 0.84217900  | -1.43257800 | -1.39584000 |
| 10     | C    | -0.49374500 | -2.18774600 | -1.33144400 |
| 11     | C    | 2.11122400  | 0.77693400  | -0.98964300 |
| 12     | C    | 3.43719200  | 0.37291300  | -0.43832900 |
| 13     | O    | 1.79971400  | -1.94039900 | -1.96848900 |
| 14     | C    | -1.89406000 | -0.50204900 | -2.52491700 |
| 15     | O    | -0.74874500 | -0.76179500 | 2.26955900  |
| 16     | C    | -2.82436700 | -2.56302900 | 2.94366400  |
| 17     | C    | -4.26733800 | -1.93467800 | -1.84959100 |
| 18     | C    | -2.49048300 | 0.82964100  | 0.24580500  |
| 19     | C    | -1.58528200 | 1.90428300  | 0.86457500  |
| 20     | O    | -0.25168800 | 1.59631500  | 0.38461900  |
| 21     | C    | -1.89893100 | 3.37245400  | 0.50790000  |
| 22     | C    | -1.72425500 | 3.66803000  | -0.98794700 |
| 23     | C    | -1.01618100 | 4.30550500  | 1.34796200  |
| 24     | O    | -3.27590900 | 3.50083200  | 0.89855500  |
| 25     | O    | 1.97361500  | 1.82186600  | -1.61248800 |
| 26     | C    | 4.57737400  | 1.08105800  | -0.84214500 |
| 27     | C    | 5.82130600  | 0.74159500  | -0.31574200 |
| 28     | C    | 5.94263400  | -0.28732600 | 0.61795100  |
| 29     | C    | 4.80290200  | -0.98763100 | 1.02852000  |
| 30     | C    | 3.55356100  | -0.66085200 | 0.49962900  |
| 31     | O    | 4.97447300  | -1.98076300 | 1.95444900  |
| 32     | H    | -4.08978000 | -3.26517300 | 0.59235800  |
| 33     | H    | -4.14457700 | -1.52209600 | 0.71543700  |
| 34     | H    | -1.68228200 | -3.24480300 | 1.26206800  |
| 35     | H    | -2.69311000 | -3.25813400 | -1.30373200 |
| 36     | H    | -0.54271700 | -2.81182300 | -2.22990000 |
| 37     | H    | -0.42353900 | -2.88616400 | -0.48590400 |
| 38     | H    | -1.02804300 | 0.14772700  | -2.67684600 |
| 39     | H    | -1.94093000 | -1.18609500 | -3.37868500 |
| 40     | H    | -2.79085300 | 0.12144900  | -2.55937000 |
| 41     | H    | -3.52173000 | -1.76321200 | 3.21955400  |
| 42     | H    | -1.98433100 | -2.53065100 | 3.64108100  |
| 43     | H    | -3.34445000 | -3.51985400 | 3.05898700  |
| 44     | H    | -4.67276300 | -0.94096700 | -1.62490400 |
| 45     | H    | -5.05644500 | -2.66333000 | -1.62914400 |
| 46     | H    | -4.06819800 | -1.98464200 | -2.92329000 |
| 47     | H    | -3.32628500 | 0.59645500  | 0.90832400  |
| 48     | H    | -2.90887200 | 1.16756800  | -0.70383600 |
| 49     | H    | -1.56300100 | 1.80399200  | 1.95416600  |

|    |   |             |             |             |
|----|---|-------------|-------------|-------------|
| 50 | H | -1.93777200 | 4.72636100  | -1.18221200 |
| 51 | H | -2.41582800 | 3.07611700  | -1.59556700 |
| 52 | H | -0.70114200 | 3.46156500  | -1.31666800 |
| 53 | H | 0.04414500  | 4.14767400  | 1.12776400  |
| 54 | H | -1.25352200 | 5.35436400  | 1.12926000  |
| 55 | H | -1.18429200 | 4.13074200  | 2.41591600  |
| 56 | H | -3.52805700 | 4.42898700  | 0.77038400  |
| 57 | H | 4.46508300  | 1.88282800  | -1.56332900 |
| 58 | H | 6.70988100  | 1.28168800  | -0.63131800 |
| 59 | H | 6.90529900  | -0.56108500 | 1.03851200  |
| 60 | H | 2.66648800  | -1.19781200 | 0.82633400  |
| 61 | H | 4.11479300  | -2.39199200 | 2.13431600  |

**Table S11. The Cartesian coordinates for the lowest-energy conformer of (1*R*,3*S*,5*R*,6*S*,17*R*)-**3a5** in the ECD calculations.**

| Number | Atom | X           | Y           | Z           |
|--------|------|-------------|-------------|-------------|
| 1      | C    | -3.90587700 | -0.85991800 | 1.28564000  |
| 2      | C    | -2.66626200 | -1.16160800 | 2.13344900  |
| 3      | C    | -1.42160200 | -0.51568500 | 1.52964100  |
| 4      | C    | -1.48008900 | -0.08930000 | 0.03496500  |
| 5      | C    | -2.35915600 | -1.06587100 | -0.81989500 |
| 6      | C    | -3.80210500 | -1.27651900 | -0.19933200 |
| 7      | C    | -0.05713200 | -0.06048600 | -0.49235600 |
| 8      | C    | 0.61123700  | -1.11465500 | -1.01189600 |
| 9      | C    | -0.11192800 | -2.38555900 | -1.19208500 |
| 10     | C    | -1.60050800 | -2.42321000 | -0.80714300 |
| 11     | C    | 2.01982000  | -1.00096800 | -1.54907700 |
| 12     | C    | 3.14363900  | -0.77815500 | -0.58778200 |
| 13     | O    | 0.43084900  | -3.40171300 | -1.59968100 |
| 14     | C    | -2.44058000 | -0.60595000 | -2.29312400 |
| 15     | O    | -0.42567000 | -0.30104800 | 2.20025000  |
| 16     | C    | -2.83513700 | -0.77800300 | 3.61029300  |
| 17     | C    | -4.96467100 | -0.60919600 | -0.95667400 |
| 18     | C    | -1.82887300 | 1.43155200  | 0.02035700  |
| 19     | C    | -0.45958000 | 2.10117800  | 0.19558700  |
| 20     | O    | 0.48512000  | 1.16757600  | -0.39296700 |
| 21     | C    | -0.26856300 | 3.50062200  | -0.43369100 |
| 22     | C    | -0.50107800 | 3.51481200  | -1.94477100 |
| 23     | C    | 1.12827900  | 4.03514000  | -0.09558200 |
| 24     | O    | -1.28410100 | 4.34467500  | 0.13420400  |
| 25     | O    | 2.21427000  | -1.10774200 | -2.74952400 |
| 26     | C    | 4.44691200  | -0.66701900 | -1.09373700 |
| 27     | C    | 5.51051600  | -0.46304700 | -0.21796200 |
| 28     | C    | 5.29487300  | -0.36479000 | 1.15745900  |
| 29     | C    | 3.99444600  | -0.47467400 | 1.66119100  |
| 30     | C    | 2.92217300  | -0.68587800 | 0.79294500  |
| 31     | O    | 3.82428300  | -0.36745700 | 3.01486600  |
| 32     | H    | -4.77577100 | -1.35745800 | 1.73153400  |
| 33     | H    | -4.12000500 | 0.21649300  | 1.34874200  |
| 34     | H    | -2.47193700 | -2.24578300 | 2.09151100  |
| 35     | H    | -3.98534400 | -2.35913900 | -0.24337100 |
| 36     | H    | -2.07991300 | -3.13163700 | -1.49106800 |
| 37     | H    | -1.65310900 | -2.89083100 | 0.18558600  |
| 38     | H    | -2.97409300 | 0.33986000  | -2.41731300 |
| 39     | H    | -1.44526500 | -0.49190800 | -2.73080100 |
| 40     | H    | -2.97007300 | -1.35825000 | -2.88678900 |
| 41     | H    | -1.91731200 | -0.97330700 | 4.16935800  |
| 42     | H    | -3.65179900 | -1.35168200 | 4.06071000  |

|    |   |             |             |             |
|----|---|-------------|-------------|-------------|
| 43 | H | -3.07388200 | 0.28725900  | 3.71339400  |
| 44 | H | -5.90772400 | -0.83354300 | -0.44429000 |
| 45 | H | -5.05968400 | -0.96682700 | -1.98518600 |
| 46 | H | -4.86333100 | 0.48227900  | -0.98453500 |
| 47 | H | -2.52073300 | 1.73587200  | 0.80820000  |
| 48 | H | -2.27837800 | 1.70465300  | -0.93613700 |
| 49 | H | -0.20954700 | 2.16710400  | 1.26221200  |
| 50 | H | -0.29129000 | 4.51489000  | -2.33544400 |
| 51 | H | -1.54088900 | 3.27862900  | -2.18921700 |
| 52 | H | 0.15391700  | 2.79651500  | -2.44568900 |
| 53 | H | 1.90876300  | 3.39966600  | -0.52430300 |
| 54 | H | 1.24432900  | 5.05107000  | -0.48633100 |
| 55 | H | 1.28432000  | 4.06243200  | 0.99159000  |
| 56 | H | -1.00296600 | 4.58456100  | 1.03207200  |
| 57 | H | 4.59841400  | -0.74596800 | -2.16452700 |
| 58 | H | 6.52262100  | -0.37913900 | -0.60478200 |
| 59 | H | 6.11563000  | -0.20463500 | 1.84985800  |
| 60 | H | 1.91626200  | -0.76884200 | 1.19461900  |
| 61 | H | 2.87826500  | -0.45353200 | 3.21467800  |

**Table S12. The Cartesian coordinates for the lowest-energy conformer of (1*R*,3*S*,5*R*,6*S*,17*R*)-**3a6** in the ECD calculations.**

| Number | Atom | X           | Y           | Z           |
|--------|------|-------------|-------------|-------------|
| 1      | C    | -3.46756100 | -2.38381200 | 0.46751700  |
| 2      | C    | -2.32588500 | -2.40741000 | 1.48860100  |
| 3      | C    | -1.46695000 | -1.15003900 | 1.36189000  |
| 4      | C    | -1.51738200 | -0.37068800 | 0.01404800  |
| 5      | C    | -1.76635800 | -1.31265500 | -1.21302900 |
| 6      | C    | -3.02116600 | -2.25885400 | -1.00636400 |
| 7      | C    | -0.20155500 | 0.37020300  | -0.14576600 |
| 8      | C    | 0.91296200  | -0.11505000 | -0.74949100 |
| 9      | C    | 0.84917600  | -1.43733500 | -1.38166800 |
| 10     | C    | -0.48767100 | -2.19136500 | -1.32728100 |
| 11     | C    | 2.11094800  | 0.77815000  | -0.97769700 |
| 12     | C    | 3.44146700  | 0.38167600  | -0.43165200 |
| 13     | O    | 1.81054200  | -1.94747700 | -1.94581200 |
| 14     | C    | -1.88122300 | -0.50651600 | -2.52727100 |
| 15     | O    | -0.80139100 | -0.73146400 | 2.29077900  |
| 16     | C    | -2.80714000 | -2.60896600 | 2.93159400  |
| 17     | C    | -4.26542500 | -1.92197300 | -1.84819000 |
| 18     | C    | -2.49369100 | 0.82754900  | 0.23672400  |
| 19     | C    | -1.59403000 | 1.90710600  | 0.85555600  |
| 20     | O    | -0.25503400 | 1.59397900  | 0.38887100  |
| 21     | C    | -1.91865800 | 3.37743000  | 0.49785300  |
| 22     | C    | -1.80495400 | 3.65770200  | -1.00141800 |
| 23     | C    | -1.00393900 | 4.31752400  | 1.29180500  |
| 24     | O    | -3.29536300 | 3.59471800  | 0.84935000  |
| 25     | O    | 1.96502200  | 1.82341200  | -1.59794300 |
| 26     | C    | 4.57179100  | 1.11292300  | -0.82209800 |
| 27     | C    | 5.82028800  | 0.78214500  | -0.30105500 |
| 28     | C    | 5.95626800  | -0.26225100 | 0.61319500  |
| 29     | C    | 4.82669800  | -0.98681800 | 1.00942900  |
| 30     | C    | 3.57274100  | -0.66745300 | 0.48706400  |
| 31     | O    | 5.01265300  | -1.99566100 | 1.91551000  |
| 32     | H    | -4.06964300 | -3.29406500 | 0.57796100  |
| 33     | H    | -4.14306100 | -1.55287600 | 0.71671500  |
| 34     | H    | -1.65570900 | -3.24614900 | 1.23934100  |
| 35     | H    | -2.69201000 | -3.25697600 | -1.32764200 |

|    |   |             |             |             |
|----|---|-------------|-------------|-------------|
| 36 | H | -0.53195200 | -2.81160400 | -2.22863100 |
| 37 | H | -0.42174400 | -2.89379200 | -0.48505500 |
| 38 | H | -2.77572400 | 0.11984400  | -2.56624300 |
| 39 | H | -1.01273700 | 0.14042200  | -2.67721900 |
| 40 | H | -1.92724100 | -1.19196100 | -3.38000000 |
| 41 | H | -1.96761600 | -2.57221300 | 3.62940600  |
| 42 | H | -3.31064200 | -3.57611600 | 3.03325300  |
| 43 | H | -3.51797000 | -1.82547000 | 3.21983800  |
| 44 | H | -5.05728300 | -2.64871400 | -1.63124400 |
| 45 | H | -4.07202300 | -1.96183900 | -2.92330200 |
| 46 | H | -4.66436100 | -0.92845700 | -1.61132100 |
| 47 | H | -3.33363000 | 0.59026800  | 0.89304700  |
| 48 | H | -2.90745700 | 1.16280100  | -0.71567700 |
| 49 | H | -1.57252300 | 1.80424900  | 1.94729800  |
| 50 | H | -0.80785300 | 3.39928900  | -1.36942900 |
| 51 | H | -1.98820800 | 4.72041200  | -1.18624200 |
| 52 | H | -2.55125200 | 3.09376700  | -1.56930000 |
| 53 | H | 0.04587100  | 4.15812900  | 1.02817700  |
| 54 | H | -1.26626100 | 5.35952200  | 1.08275500  |
| 55 | H | -1.10653600 | 4.14456900  | 2.37207500  |
| 56 | H | -3.34264800 | 3.69514600  | 1.81396300  |
| 57 | H | 4.44813000  | 1.92585300  | -1.52874900 |
| 58 | H | 6.70095400  | 1.34097000  | -0.60596300 |
| 59 | H | 6.92270400  | -0.53021800 | 1.02879900  |
| 60 | H | 2.69420800  | -1.22486100 | 0.80194900  |
| 61 | H | 4.16028300  | -2.42731900 | 2.08161700  |

**Table S13. The Cartesian coordinates for the lowest-energy conformer of (1*R*,3*S*,5*R*,6*S*,17*R*)-**3a7** in the ECD calculations.**

| Number | Atom | X           | Y           | Z           |
|--------|------|-------------|-------------|-------------|
| 1      | C    | -3.64190600 | -1.86722900 | 1.27899300  |
| 2      | C    | -2.75297700 | -0.99613900 | 2.19608100  |
| 3      | C    | -1.46906200 | -0.49436800 | 1.52909600  |
| 4      | C    | -1.47233400 | -0.14203500 | 0.01488400  |
| 5      | C    | -2.29843900 | -1.18438000 | -0.81571000 |
| 6      | C    | -3.71646500 | -1.44093700 | -0.20604400 |
| 7      | C    | -0.03102600 | -0.10179800 | -0.46738500 |
| 8      | C    | 0.67419800  | -1.13909100 | -0.97487600 |
| 9      | C    | -0.01263700 | -2.42300100 | -1.18476800 |
| 10     | C    | -1.48398500 | -2.50716700 | -0.75964600 |
| 11     | C    | 2.09454300  | -0.98851700 | -1.46884400 |
| 12     | C    | 3.18066000  | -0.72567900 | -0.47263900 |
| 13     | O    | 0.54882300  | -3.41297500 | -1.63021200 |
| 14     | C    | -2.42499100 | -0.77431700 | -2.29849400 |
| 15     | O    | -0.47214000 | -0.30624900 | 2.20773600  |
| 16     | C    | -3.50557400 | 0.17954100  | 2.86503600  |
| 17     | C    | -4.74815800 | -0.31974900 | -0.44245100 |
| 18     | C    | -1.83510600 | 1.37326800  | -0.08831100 |
| 19     | C    | -0.48712400 | 2.07534200  | 0.13406200  |
| 20     | O    | 0.49599300  | 1.12791500  | -0.34891000 |
| 21     | C    | -0.30411400 | 3.41533000  | -0.60123400 |
| 22     | C    | 1.16278900  | 3.86275300  | -0.54358200 |
| 23     | C    | -1.22669600 | 4.47415400  | 0.02680600  |
| 24     | O    | -0.69866200 | 3.17256200  | -1.95722200 |
| 25     | O    | 2.33496600  | -1.10419000 | -2.65981600 |
| 26     | C    | 4.49489700  | -0.57467000 | -0.93829200 |
| 27     | C    | 5.52420400  | -0.33505100 | -0.03106300 |
| 28     | C    | 5.26353300  | -0.24020200 | 1.33684800  |

|    |   |             |             |             |
|----|---|-------------|-------------|-------------|
| 29 | C | 3.95224400  | -0.38989700 | 1.80028500  |
| 30 | C | 2.91454100  | -0.63751500 | 0.90026100  |
| 31 | O | 3.73600800  | -0.28441300 | 3.14779900  |
| 32 | H | -3.27264600 | -2.89695700 | 1.32938400  |
| 33 | H | -4.65650900 | -1.90160200 | 1.69529000  |
| 34 | H | -2.38796300 | -1.61983100 | 3.02094100  |
| 35 | H | -4.10454400 | -2.31579300 | -0.74802000 |
| 36 | H | -1.95191000 | -3.27271600 | -1.38741200 |
| 37 | H | -1.47218500 | -2.91559800 | 0.26013100  |
| 38 | H | -1.44579100 | -0.68249500 | -2.77629100 |
| 39 | H | -2.98826100 | -1.54266100 | -2.84097900 |
| 40 | H | -2.94934700 | 0.17427800  | -2.43606000 |
| 41 | H | -4.30310200 | -0.21819300 | 3.50200900  |
| 42 | H | -3.97158300 | 0.85304000  | 2.14066600  |
| 43 | H | -2.82565400 | 0.76114100  | 3.49605000  |
| 44 | H | -4.93953400 | -0.16618400 | -1.50820800 |
| 45 | H | -4.44883900 | 0.64375800  | -0.02090300 |
| 46 | H | -5.70231900 | -0.59546000 | 0.02104300  |
| 47 | H | -2.57806400 | 1.69621600  | 0.64237900  |
| 48 | H | -2.20286400 | 1.60945400  | -1.08779400 |
| 49 | H | -0.28505300 | 2.22724000  | 1.20060700  |
| 50 | H | 1.49874300  | 3.99904500  | 0.49035400  |
| 51 | H | 1.28098200  | 4.82522400  | -1.05813800 |
| 52 | H | 1.80742200  | 3.12293500  | -1.02294100 |
| 53 | H | -1.10221800 | 5.42976100  | -0.49538200 |
| 54 | H | -2.27759300 | 4.18083600  | -0.06176800 |
| 55 | H | -0.99477600 | 4.64047500  | 1.08524800  |
| 56 | H | -0.36202300 | 3.90161200  | -2.50023900 |
| 57 | H | 4.68145900  | -0.65183100 | -2.00369000 |
| 58 | H | 6.54463800  | -0.22032100 | -0.38705500 |
| 59 | H | 6.05706700  | -0.05223200 | 2.05361300  |
| 60 | H | 1.89996400  | -0.75090400 | 1.27144100  |
| 61 | H | 2.78650500  | -0.39533000 | 3.31666300  |

**Table S14. The Cartesian coordinates for the lowest-energy conformer of (1*R*,3*S*,5*R*,6*S*,17*R*)-**3a8** in the ECD calculations.**

| Number | Atom | X           | Y           | Z           |
|--------|------|-------------|-------------|-------------|
| 1      | C    | 4.13903300  | -1.69825100 | 0.06384600  |
| 2      | C    | 3.57815100  | -1.53960600 | -1.35401200 |
| 3      | C    | 2.47159800  | -0.48691300 | -1.36091400 |
| 4      | C    | 1.69476400  | -0.23333300 | -0.02934500 |
| 5      | C    | 1.66418600  | -1.49256000 | 0.90086700  |
| 6      | C    | 3.10491100  | -2.10697000 | 1.13775500  |
| 7      | C    | 0.28274700  | 0.19931600  | -0.39770100 |
| 8      | C    | -0.78153100 | -0.63100300 | -0.56344000 |
| 9      | C    | -0.58762400 | -2.06749300 | -0.33459500 |
| 10     | C    | 0.78617600  | -2.54197900 | 0.16217200  |
| 11     | C    | -2.10464000 | -0.10053300 | -1.05832800 |
| 12     | C    | -3.35626900 | -0.35444500 | -0.27508000 |
| 13     | O    | -1.46701100 | -2.89463700 | -0.54551000 |
| 14     | C    | 0.96732100  | -1.18375800 | 2.24544600  |
| 15     | O    | 2.23712000  | 0.19198900  | -2.34199300 |
| 16     | C    | 4.65563600  | -1.21962900 | -2.39739000 |
| 17     | C    | 3.73209600  | -1.84192800 | 2.51875200  |
| 18     | C    | 2.26174900  | 1.09974700  | 0.55092000  |
| 19     | C    | 1.45763100  | 2.16967100  | -0.19822200 |
| 20     | O    | 0.18692200  | 1.52924400  | -0.49928000 |
| 21     | C    | 1.20099800  | 3.50845700  | 0.53101500  |



|    |   |             |             |             |
|----|---|-------------|-------------|-------------|
| 22 | C | 0.44909000  | 3.34060200  | 1.85161000  |
| 23 | C | 0.45166300  | 4.46901000  | -0.40036600 |
| 24 | O | 2.49148100  | 4.04029900  | 0.87456900  |
| 25 | O | -2.14090100 | 0.56374000  | -2.08485000 |
| 26 | C | -3.35539600 | -0.87408800 | 1.02472600  |
| 27 | C | -4.56139500 | -1.02227800 | 1.71147900  |
| 28 | C | -5.76866800 | -0.66554200 | 1.11670400  |
| 29 | C | -5.77030300 | -0.14681200 | -0.18504100 |
| 30 | C | -4.57010200 | 0.01448600  | -0.87243200 |
| 31 | O | -6.98176600 | 0.18863800  | -0.72520800 |
| 32 | H | 4.94848100  | -2.43835800 | 0.05257800  |
| 33 | H | 4.61242700  | -0.74960700 | 0.35636200  |
| 34 | H | 3.09813800  | -2.48612800 | -1.64798500 |
| 35 | H | 2.97290000  | -3.19527600 | 1.06181700  |
| 36 | H | 0.60045900  | -3.40436900 | 0.81166900  |
| 37 | H | 1.30832200  | -2.94422100 | -0.71510400 |
| 38 | H | 1.52504500  | -0.47736600 | 2.86488100  |
| 39 | H | -0.03294800 | -0.77101400 | 2.08865000  |
| 40 | H | 0.85335400  | -2.10560500 | 2.82569100  |
| 41 | H | 4.21019000  | -1.07203700 | -3.38366000 |
| 42 | H | 5.38211000  | -2.03711000 | -2.45542500 |
| 43 | H | 5.19602000  | -0.30284500 | -2.13379500 |
| 44 | H | 4.71976700  | -2.31586100 | 2.56496900  |
| 45 | H | 3.13671600  | -2.24994000 | 3.33987100  |
| 46 | H | 3.87873900  | -0.77105400 | 2.70405700  |
| 47 | H | 3.33474600  | 1.22592000  | 0.39255100  |
| 48 | H | 2.07818300  | 1.15440600  | 1.62559900  |
| 49 | H | 1.92808500  | 2.38526500  | -1.16411500 |
| 50 | H | -0.50659200 | 2.83339700  | 1.69218400  |
| 51 | H | 0.25620100  | 4.32518500  | 2.28780100  |
| 52 | H | 1.03839200  | 2.77042500  | 2.57580900  |
| 53 | H | 0.31791300  | 5.43836300  | 0.09044900  |
| 54 | H | 1.01242700  | 4.62625400  | -1.33166800 |
| 55 | H | -0.52977600 | 4.06927500  | -0.67222400 |
| 56 | H | 2.88880900  | 4.39888900  | 0.06432900  |
| 57 | H | -2.42522100 | -1.16685200 | 1.49745200  |
| 58 | H | -4.56240200 | -1.42423900 | 2.72099300  |
| 59 | H | -6.71410900 | -0.78178200 | 1.63740100  |
| 60 | H | -4.54472300 | 0.42935100  | -1.87699800 |
| 61 | H | -6.83933000 | 0.51774000  | -1.62653300 |

**Table S15. The NO inhibitory effects of compounds 1–3 at the maximum safe concentrations on LPS-induced RAW264.7 macrophages.**

| compound | concentration ( $\mu\text{M}$ ) | NO inhibition rate |
|----------|---------------------------------|--------------------|
| <b>1</b> | 100                             | 70.88 $\pm$ 0.10%  |
| <b>2</b> | 50                              | 73.39 $\pm$ 0.02%  |
| <b>3</b> | 50                              | 26.60 $\pm$ 0.23%  |
| DEX      | 10                              | 71.90 $\pm$ 0.10%  |

cleaved IL-1 $\beta$

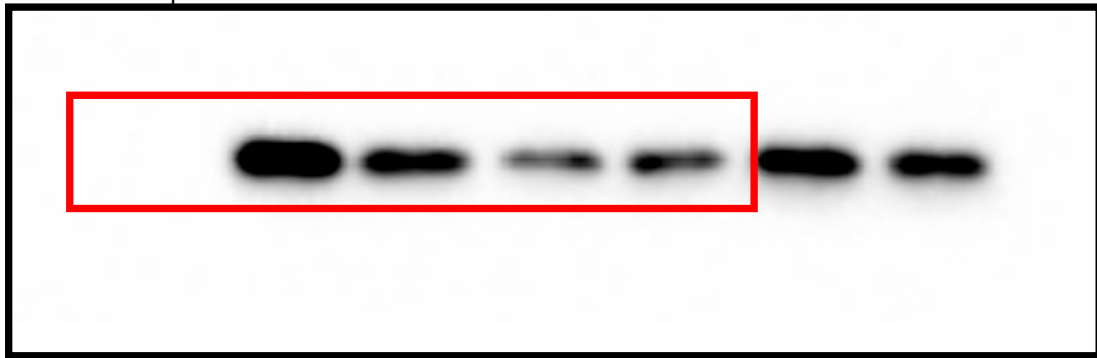

NLRP3

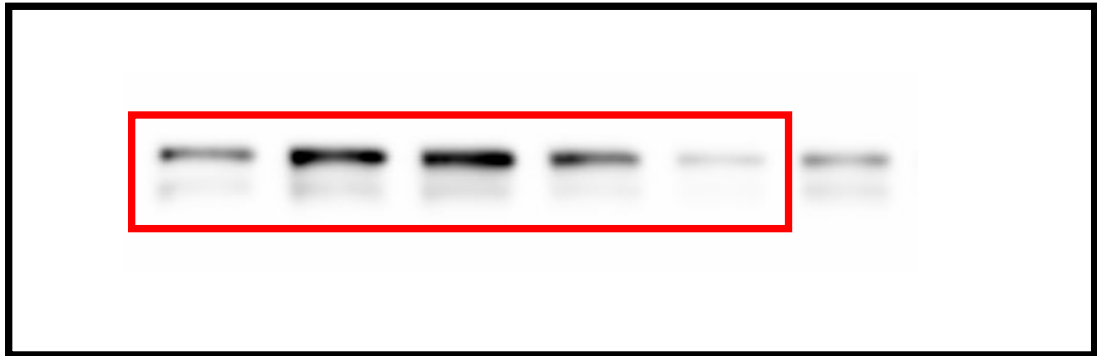

pro-IL-1 $\beta$

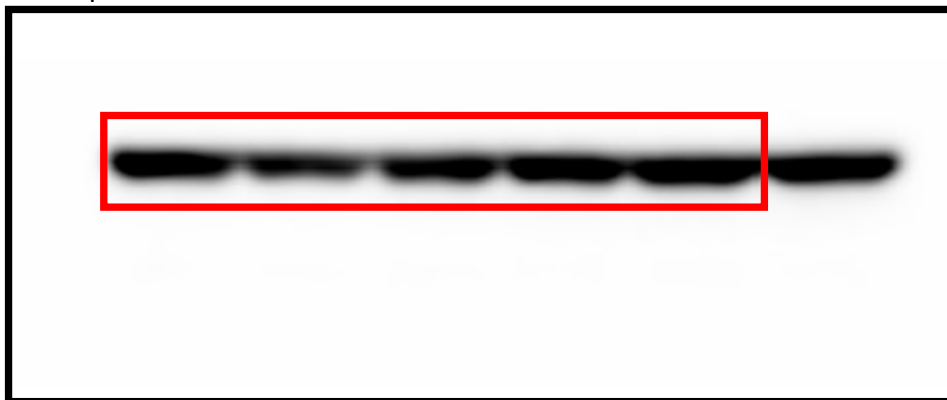

pro-caspase 1

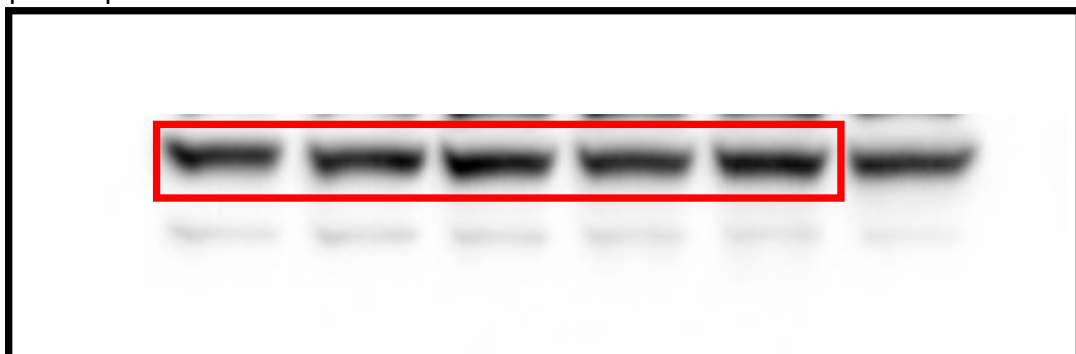

cleaved caspase 1

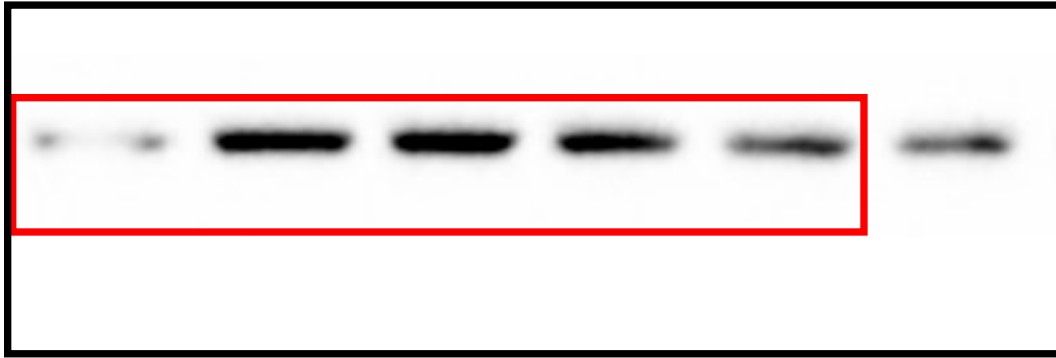

$\beta$ -actin

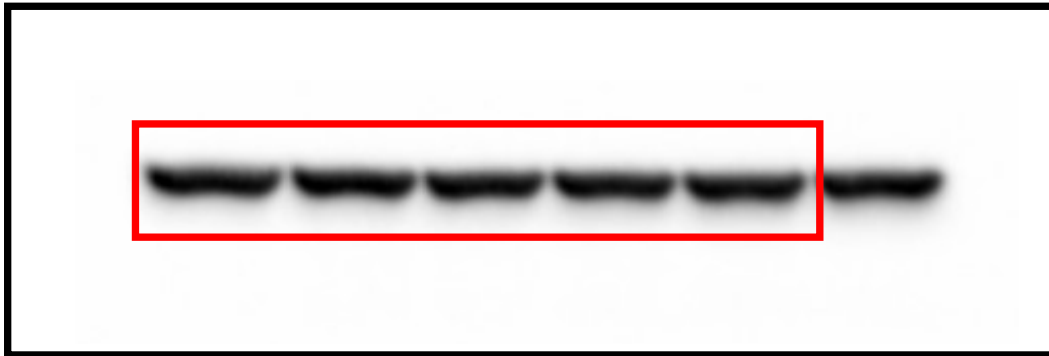

pro-GSDMD

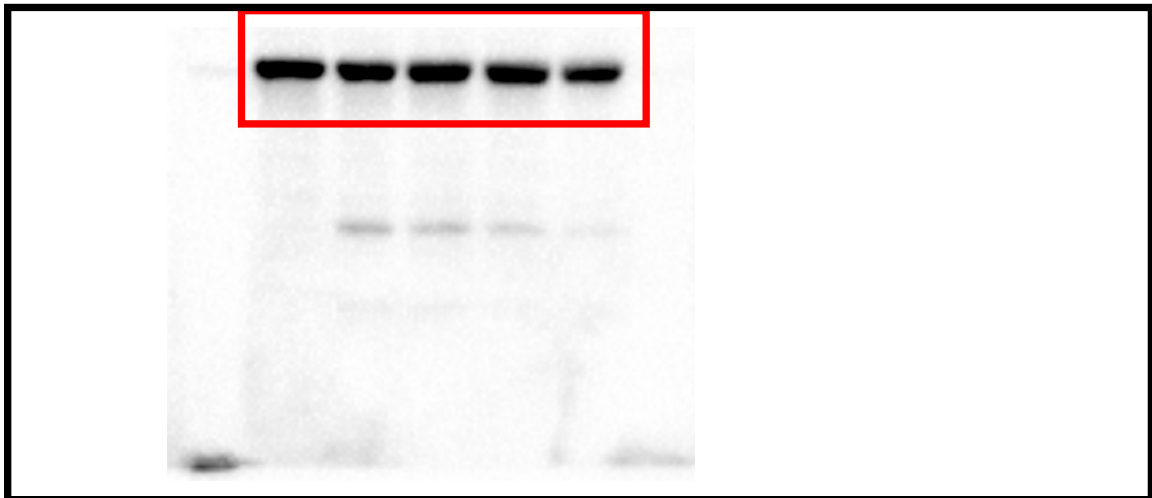

GSDMD-N

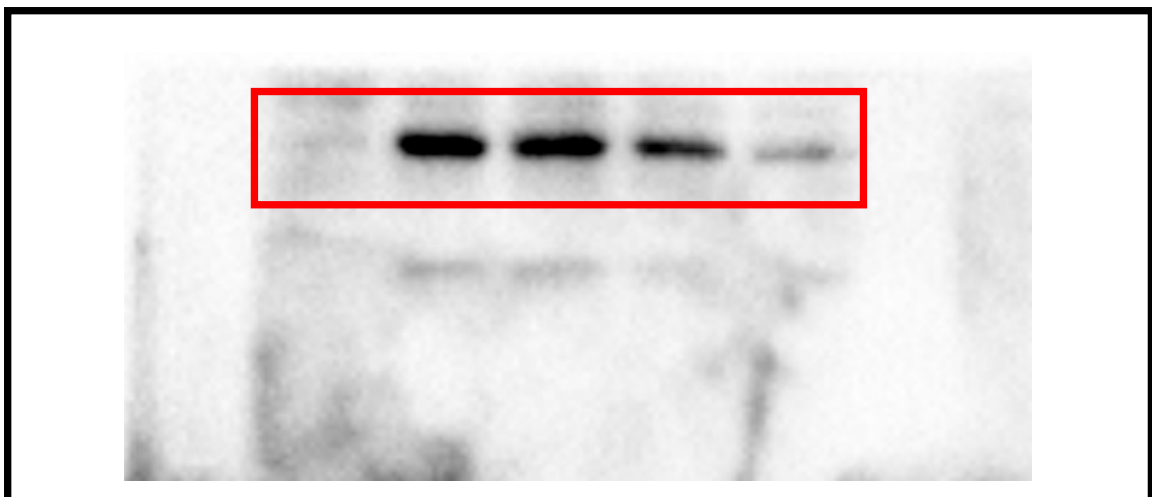

$\beta$ -actin

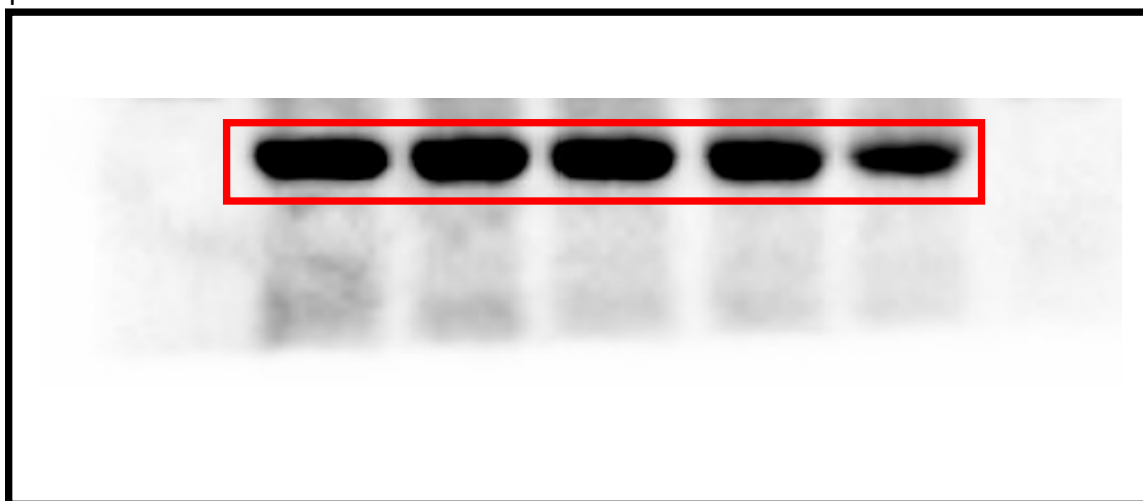

**Fig. S41. Uncropped blots.**

#### References

1. Goto, H.; Osawa, E.; *J. Chem. Soc., Perkin Trans.*, 1993, 2, 187–198.
2. Frisch, M.J., Trucks, G.W., Schlegel, H.B., Scuseria, G.E., Robb, M.A., Cheeseman, J.R.; Scalmani, G.; Barone, V.; Petersson, G.A.; Nakatsuji, H.; Li, X.; Caricato, M.; Marenich, A.V.; Bloino, J., Janesko, B.G., Gomperts, R., Mennucci, B., Hratchian, H.P., Ortiz, J.V., Izmaylov, A.F., Sonnenberg, J.L., Williams-Young, D., Ding, F., Lipparini, F., Egidi, F., Goings, J., Peng, B., Petrone, A., Henderson, T., Ranasinghe, D., Zakrzewski, V.G., Gao, J., Rega, N., Zheng, G., Liang, W., Hada, M., Ehara, M., Toyota, K., Fukuda, R., Hasegawa, J., Ishida, M., Nakajima, T., Honda, Y., Kitao, O., Nakai, H., Vreven, T., Throssell, K., Montgomery Jr., J.A., Peralta, J.E., Ogliaro, F., Bearpark, M.J., Heyd, J.J., Brothers, E.N., Kudin, K.N., Staroverov, V.N., Keith, T.A., Kobayashi, R., Normand, J., Raghavachari, K., Rendell, A.P., Burant, J.C., Iyengar, S.S., Tomasi, J., Cossi, M., Millam, J.M., Klene, M., Adamo, C., Cammi, R., Ochterski, J.W., Martin, R.L., Morokuma, K., Farkas, O., Foresman, J.B., Fox, D.J. *Gaussian 16*, Revision B.01, Gaussian, Inc., Wallingford CT (2016) *GaussView 5.0*. Wallingford, E.U.A.
3. Bruhn, T.; Hemberger, Y.; Schaumlöffel, A.; Bringmann, G. *Spec Dis*, version 1.51, University of Würzburg, Germany, 2010
4. *Spartan 18*; Wavefunction Inc.:Irvine, CA.
5. Frisch, M. J.; Trucks, G. W.; Schlegel, H. B.; Scuseria, G. E.; Robb, M. A.; Cheeseman, J. R.; Scalmani, G.; Barone, V.; Mennucci, B.; Petersson, G. A.; Nakatsuji, H.; Caricato, M.; Li, X.; Hratchian, H. P.; Izmaylov, A. F.; Bloino, J.; Zheng, G.; Sonnenberg, J. L.; Hada, M.; Ehara, M.; Toyota, K.; Fukuda, R.; Hasegawa, J.; Ishida, M.; Nakajima, T.; Honda, Y.; Kitao, O.; Nakai, H.; Vreven, T.; Montgomery, Jr., J. A.; Peralta, J. E.; Ogliaro, F.; Bearpark, M.; Heyd, J. J.; Brothers,

E.; Kudin, K. N.; Staroverov, V. N.; Kobayashi, R.; Normand, J.; Raghavachari, K.; Rendell, A.; Burant, J. C.; Iyengar, S. S.; Tomasi, J.; Cossi, M.; Rega, N.; Millam, J. M.; Klene, M.; Knox, J. E.; Cross, J. B.; Bakken, V.; Adamo, C.; Jaramillo, J.; Gomperts, R.; Stratmann, R. E.; Yazyev, O.; Austin, A. J.; Cammi, R.; Pomelli, C.; Ochterski, J. W.; Martin, R. L.; Morokuma, K.; Zakrzewski, V. G.; Voth, G. A.; Salvador, P.; Dannenberg, J. J.; Dapprich, S.; Daniels, A. D.; Farkas, Ö.; Foresman, J. B.; Ortiz, J. V.; Cioslowski, J.; Fox, D. J. *Gaussian 09*, Revision A.1, Gaussian, Inc., Wallingford CT, 2009.

6. Stephens, P. J.; Harada, N. ECD cotton effect approximated by the Gaussian curve and other methods. *Chirality* 2010, 22, 229–233.
